# Supplementary material for: Gas phase H+, H3O+ and NH4+ affinities of oxygen-bearing volatile organic compounds; DFT calculations for soft chemical ionisation mass spectrometry
Source: Royal Society of Chemistry journal article supplement (doi:10.1039/d3cp03604a), 2023-01-01
Supplement: d3cp03604a1.pdf [file d3cp03604a1.pdf]

## Electronic supplementary information

### Gas phase $\text{H}^+$ , $\text{H}_3\text{O}^+$ and $\text{NH}_4^+$ affinities of oxygen-bearing volatile organic compounds; DFT calculations for soft chemical ionisation mass spectrometry

Maroua Omezzine Gnioua<sup>1,2</sup>, Anatolii Spesyvyi<sup>1</sup> and Patrik Španěl<sup>1</sup>

<sup>1</sup>J. Heyrovsky Institute of Physical Chemistry, Academy of Sciences of the Czech Republic, Prague, Czech Republic.

<sup>2</sup> Charles University Prague, Faculty of Mathematics and Physics, Prague, Czech Republic

---

## H<sub>2</sub>O

CARTESIAN COORDINATES (ANGSTROEM)

INPUT GEOMETRY OPTIMIZATION CYCLE  
O -3.133500 0.572570 0.000000  
H -2.163500 0.572570 0.000000  
H -3.456830 -0.082380 0.638280

FINAL GEOMETRY OPTIMIZATION CYCLE  
O -3.154794 0.628826 0.146509  
H -2.205451 0.583985 -0.094060  
H -3.466262 -0.150137 0.653801  
H -3.738102 0.867536 -0.604500

VIBRATIONAL FREQUENCIES

Scaling factor for frequencies = 1.00000000 (already applied!)

0: 0.00 cm<sup>-1</sup>  
1: 0.00 cm<sup>-1</sup>  
2: 0.00 cm<sup>-1</sup>  
3: 0.00 cm<sup>-1</sup>  
4: 0.00 cm<sup>-1</sup>  
5: 0.00 cm<sup>-1</sup>  
6: 1602.07 cm<sup>-1</sup>  
7: 3812.37 cm<sup>-1</sup>  
8: 3916.85 cm<sup>-1</sup>

GIBBS FREE ENERGY

The Gibbs free energy is  $G = H - T \cdot S$

|                          |     |                 |                 |
|--------------------------|-----|-----------------|-----------------|
| Total enthalpy           | ... | -76.65643341 Eh |                 |
| Total entropy correction | ... | -0.02301514 Eh  | -14.44 kcal/mol |
| -----                    |     |                 |                 |
| Final Gibbs free energy  | ... | -76.67944855 Eh |                 |

H<sub>3</sub>O<sup>+</sup>

CARTESIAN COORDINATES (ANGSTROEM)

INPUT GEOMETRY OPTIMIZATION CYCLE

|   |           |           |           |
|---|-----------|-----------|-----------|
| O | -3.143300 | 0.582520  | -0.009690 |
| H | -2.181760 | 0.555870  | 0.016270  |
| H | -3.428770 | -0.075630 | 0.631700  |
| H | -3.810780 | 0.867450  | -0.536530 |

FINAL GEOMETRY OPTIMIZATION CYCLE

|   |           |           |           |
|---|-----------|-----------|-----------|
| O | -3.143249 | 0.582466  | -0.009644 |
| H | -2.181963 | 0.555810  | 0.016334  |
| H | -3.428618 | -0.075516 | 0.631590  |

VIBRATIONAL FREQUENCIES

Scaling factor for frequencies = 1.00000000 (already applied!)

|     |         |                    |
|-----|---------|--------------------|
| 0:  | 0.00    | cm** <sup>-1</sup> |
| 1:  | 0.00    | cm** <sup>-1</sup> |
| 2:  | 0.00    | cm** <sup>-1</sup> |
| 3:  | 0.00    | cm** <sup>-1</sup> |
| 4:  | 0.00    | cm** <sup>-1</sup> |
| 5:  | 0.00    | cm** <sup>-1</sup> |
| 6:  | 765.88  | cm** <sup>-1</sup> |
| 7:  | 1672.08 | cm** <sup>-1</sup> |
| 8:  | 1673.09 | cm** <sup>-1</sup> |
| 9:  | 3579.20 | cm** <sup>-1</sup> |
| 10: | 3673.93 | cm** <sup>-1</sup> |
| 11: | 3674.28 | cm** <sup>-1</sup> |

GIBBS FREE ENERGY

The Gibbs free energy is  $G = H - T*S$

|                          |     |                 |                 |
|--------------------------|-----|-----------------|-----------------|
| Total enthalpy           | ... | -76.65643341 Eh |                 |
| Total entropy correction | ... | -0.02301514 Eh  | -14.44 kcal/mol |
| -----                    |     |                 |                 |
| Final Gibbs free energy  | ... | -76.67944855    |                 |

**NH<sub>3</sub>**

CARTESIAN COORDINATES (ANGSTROEM)

## INPUT GEOMETRY OPTIMIZATION CYCLE

|   |           |           |           |
|---|-----------|-----------|-----------|
| N | -1.132050 | 0.684240  | 0.000000  |
| H | -0.112050 | 0.684240  | 0.000000  |
| H | -1.472050 | 0.891200  | 0.939130  |
| H | -1.472050 | -0.232550 | -0.290330 |

## FINAL GEOMETRY OPTIMIZATION CYCLE

|   |           |           |           |
|---|-----------|-----------|-----------|
| N | -1.138118 | 0.696873  | -0.011584 |
| H | -0.123677 | 0.676480  | 0.007135  |
| H | -1.463183 | 0.880309  | 0.932104  |
| H | -1.463222 | -0.226532 | -0.278854 |

## VIBRATIONAL FREQUENCIES

Scaling factor for frequencies = 1.00000000 (already applied!)

|     |         |                    |
|-----|---------|--------------------|
| 0:  | 0.00    | cm** <sup>-1</sup> |
| 1:  | 0.00    | cm** <sup>-1</sup> |
| 2:  | 0.00    | cm** <sup>-1</sup> |
| 3:  | 0.00    | cm** <sup>-1</sup> |
| 4:  | 0.00    | cm** <sup>-1</sup> |
| 5:  | 0.00    | cm** <sup>-1</sup> |
| 6:  | 1006.15 | cm** <sup>-1</sup> |
| 7:  | 1667.64 | cm** <sup>-1</sup> |
| 8:  | 1667.71 | cm** <sup>-1</sup> |
| 9:  | 3476.45 | cm** <sup>-1</sup> |
| 10: | 3602.45 | cm** <sup>-1</sup> |
| 11: | 3602.87 | cm** <sup>-1</sup> |

## GIBBS FREE ENERGY

The Gibbs free energy is  $G = H - T*S$ 

|                          |     |                 |                 |
|--------------------------|-----|-----------------|-----------------|
| Total enthalpy           | ... | -56.50901226 Eh |                 |
| Total entropy correction | ... | -0.02185055 Eh  | -13.71 kcal/mol |
| -----                    |     |                 |                 |
| Final Gibbs free energy  | ... | -56.53086281    |                 |

**NH<sub>4</sub><sup>+</sup>**

CARTESIAN COORDINATES (ANGSTROEM)

## INPUT GEOMETRY OPTIMIZATION CYCLE

|   |           |           |           |
|---|-----------|-----------|-----------|
| N | -1.138030 | 0.696680  | -0.011400 |
| H | -0.123580 | 0.676570  | 0.007040  |
| H | -1.463280 | 0.880440  | 0.932140  |
| H | -1.463310 | -0.226560 | -0.278980 |
| H | -0.710250 | 0.157670  | -0.396260 |

## FINAL GEOMETRY OPTIMIZATION CYCLE

|   |           |           |           |
|---|-----------|-----------|-----------|
| N | -1.125544 | 0.690092  | -0.109914 |
| H | -0.213311 | 1.164189  | 0.069980  |
| H | -1.286626 | 0.600905  | 0.942534  |
| H | -1.922125 | 0.037184  | -0.263798 |
| H | -0.350844 | -0.307570 | -0.386262 |

## VIBRATIONAL FREQUENCIES

Scaling factor for frequencies = 1.00000000 (already applied!)

|     |         |                    |
|-----|---------|--------------------|
| 0:  | 0.00    | cm** <sup>-1</sup> |
| 1:  | 0.00    | cm** <sup>-1</sup> |
| 2:  | 0.00    | cm** <sup>-1</sup> |
| 3:  | 0.00    | cm** <sup>-1</sup> |
| 4:  | 0.00    | cm** <sup>-1</sup> |
| 5:  | 0.00    | cm** <sup>-1</sup> |
| 6:  | 1488.64 | cm** <sup>-1</sup> |
| 7:  | 1488.79 | cm** <sup>-1</sup> |
| 8:  | 1488.94 | cm** <sup>-1</sup> |
| 9:  | 1726.32 | cm** <sup>-1</sup> |
| 10: | 1726.41 | cm** <sup>-1</sup> |
| 11: | 3368.50 | cm** <sup>-1</sup> |
| 12: | 3471.05 | cm** <sup>-1</sup> |
| 13: | 3471.10 | cm** <sup>-1</sup> |
| 14: | 3471.16 | cm** <sup>-1</sup> |

## GIBBS FREE ENERGY

The Gibbs free energy is  $G = H - T*S$ 

|                          |     |                 |                 |
|--------------------------|-----|-----------------|-----------------|
| Total enthalpy           | ... | -56.83127180 Eh |                 |
| Total entropy correction | ... | -0.02279770 Eh  | -14.31 kcal/mol |
| -----                    |     |                 |                 |
| Final Gibbs free energy  | ... | -56.85406951    |                 |

**ACETONE C<sub>3</sub>H<sub>6</sub>O**

CARTESIAN COORDINATES (ANGSTROEM)

## INPUT GEOMETRY OPTIMIZATION CYCLE

|   |          |          |           |
|---|----------|----------|-----------|
| C | 1.302070 | 5.535510 | 0.395750  |
| C | 1.664750 | 4.137780 | 0.817770  |
| H | 2.062630 | 6.236460 | 0.750840  |
| H | 0.334710 | 5.808020 | 0.824240  |
| H | 1.261500 | 5.590780 | -0.695110 |
| C | 0.803800 | 3.016300 | 0.302750  |
| H | 0.225390 | 2.595310 | 1.128540  |
| H | 1.440900 | 2.249180 | -0.144780 |
| H | 0.114740 | 3.383300 | -0.462600 |
| O | 2.604130 | 3.919790 | 1.582740  |

## FINAL GEOMETRY OPTIMIZATION CYCLE

|   |           |          |           |
|---|-----------|----------|-----------|
| C | 1.262204  | 5.541412 | 0.513412  |
| C | 1.766104  | 4.121529 | 0.688764  |
| H | 2.034985  | 6.250616 | 0.807348  |
| H | 0.367467  | 5.699283 | 1.124686  |
| H | 0.972136  | 5.717611 | -0.527343 |
| C | 0.818387  | 3.013304 | 0.272473  |
| H | -0.141266 | 3.116887 | 0.788936  |
| H | 1.256351  | 2.041341 | 0.496071  |
| H | 0.610856  | 3.083975 | -0.800540 |
| O | 2.867395  | 3.886475 | 1.136334  |

## VIBRATIONAL FREQUENCIES

Scaling factor for frequencies = 1.00000000 (already applied!)

|     |         |                    |
|-----|---------|--------------------|
| 0:  | 0.00    | cm** <sup>-1</sup> |
| 1:  | 0.00    | cm** <sup>-1</sup> |
| 2:  | 0.00    | cm** <sup>-1</sup> |
| 3:  | 0.00    | cm** <sup>-1</sup> |
| 4:  | 0.00    | cm** <sup>-1</sup> |
| 5:  | 0.00    | cm** <sup>-1</sup> |
| 6:  | 20.63   | cm** <sup>-1</sup> |
| 7:  | 127.68  | cm** <sup>-1</sup> |
| 8:  | 382.04  | cm** <sup>-1</sup> |
| 9:  | 489.61  | cm** <sup>-1</sup> |
| 10: | 535.56  | cm** <sup>-1</sup> |
| 11: | 784.66  | cm** <sup>-1</sup> |
| 12: | 882.98  | cm** <sup>-1</sup> |
| 13: | 887.38  | cm** <sup>-1</sup> |
| 14: | 1083.16 | cm** <sup>-1</sup> |
| 15: | 1116.02 | cm** <sup>-1</sup> |
| 16: | 1232.75 | cm** <sup>-1</sup> |
| 17: | 1385.29 | cm** <sup>-1</sup> |
| 18: | 1386.15 | cm** <sup>-1</sup> |
| 19: | 1459.58 | cm** <sup>-1</sup> |
| 20: | 1464.01 | cm** <sup>-1</sup> |
| 21: | 1470.11 | cm** <sup>-1</sup> |
| 22: | 1486.79 | cm** <sup>-1</sup> |
| 23: | 1785.09 | cm** <sup>-1</sup> |
| 24: | 3021.89 | cm** <sup>-1</sup> |
| 25: | 3029.07 | cm** <sup>-1</sup> |
| 26: | 3076.28 | cm** <sup>-1</sup> |
| 27: | 3083.59 | cm** <sup>-1</sup> |
| 28: | 3136.80 | cm** <sup>-1</sup> |
| 29: | 3137.84 | cm** <sup>-1</sup> |

## GIBBS FREE ENERGY

The Gibbs free energy is  $G = H - T*S$ 

|                          |     |                  |                 |
|--------------------------|-----|------------------|-----------------|
| Total enthalpy           | ... | -193.01976255 Eh |                 |
| Total entropy correction | ... | -0.03450410 Eh   | -21.65 kcal/mol |

-----  
Final Gibbs free energy           ...   -193.05426665

**PROTONATED ACETONE C<sub>3</sub>H<sub>7</sub>O<sup>+</sup>**  
CARTESIAN COORDINATES (ANGSTROEM)

INPUT GEOMETRY OPTIMIZATION CYCLE

|   |           |          |           |
|---|-----------|----------|-----------|
| C | 1.261780  | 5.541500 | 0.514800  |
| C | 1.766090  | 4.121620 | 0.688520  |
| H | 2.036930  | 6.250960 | 0.801700  |
| H | 0.372170  | 5.700210 | 1.133370  |
| H | 0.962970  | 5.716600 | -0.523670 |
| C | 0.818630  | 3.013320 | 0.271530  |
| H | -0.144900 | 3.121240 | 0.779680  |
| H | 1.253070  | 2.041560 | 0.502740  |
| H | 0.620160  | 3.078990 | -0.803580 |
| O | 2.867730  | 3.886420 | 1.135050  |
| H | 3.910310  | 4.256720 | 1.574000  |

FINAL GEOMETRY OPTIMIZATION CYCLE

|   |           |          |           |
|---|-----------|----------|-----------|
| C | 1.332383  | 5.519144 | 0.581991  |
| C | 1.732448  | 4.104210 | 0.674091  |
| H | 2.168282  | 6.214584 | 0.674610  |
| H | 0.618774  | 5.709296 | 1.398215  |
| H | 0.782822  | 5.698408 | -0.346391 |
| C | 0.851481  | 3.002305 | 0.265626  |
| H | -0.193640 | 3.235256 | 0.481038  |
| H | 1.157958  | 2.051865 | 0.700586  |
| H | 0.931154  | 2.923321 | -0.831043 |
| O | 2.880373  | 3.761633 | 1.120737  |
| H | 3.462906  | 4.509118 | 1.354681  |

VIBRATIONAL FREQUENCIES

Scaling factor for frequencies = 1.00000000 (already applied!)

|     |         |                    |
|-----|---------|--------------------|
| 0:  | 0.00    | cm** <sup>-1</sup> |
| 1:  | 0.00    | cm** <sup>-1</sup> |
| 2:  | 0.00    | cm** <sup>-1</sup> |
| 3:  | 0.00    | cm** <sup>-1</sup> |
| 4:  | 0.00    | cm** <sup>-1</sup> |
| 5:  | 0.00    | cm** <sup>-1</sup> |
| 6:  | 103.54  | cm** <sup>-1</sup> |
| 7:  | 134.94  | cm** <sup>-1</sup> |
| 8:  | 396.77  | cm** <sup>-1</sup> |
| 9:  | 482.49  | cm** <sup>-1</sup> |
| 10: | 511.94  | cm** <sup>-1</sup> |
| 11: | 718.22  | cm** <sup>-1</sup> |
| 12: | 830.94  | cm** <sup>-1</sup> |
| 13: | 922.95  | cm** <sup>-1</sup> |
| 14: | 950.72  | cm** <sup>-1</sup> |
| 15: | 1075.28 | cm** <sup>-1</sup> |
| 16: | 1092.71 | cm** <sup>-1</sup> |
| 17: | 1158.21 | cm** <sup>-1</sup> |
| 18: | 1363.14 | cm** <sup>-1</sup> |
| 19: | 1373.75 | cm** <sup>-1</sup> |
| 20: | 1406.43 | cm** <sup>-1</sup> |
| 21: | 1426.15 | cm** <sup>-1</sup> |
| 22: | 1444.08 | cm** <sup>-1</sup> |
| 23: | 1466.41 | cm** <sup>-1</sup> |
| 24: | 1489.48 | cm** <sup>-1</sup> |
| 25: | 1586.34 | cm** <sup>-1</sup> |
| 26: | 2993.14 | cm** <sup>-1</sup> |
| 27: | 3005.63 | cm** <sup>-1</sup> |
| 28: | 3077.00 | cm** <sup>-1</sup> |
| 29: | 3087.22 | cm** <sup>-1</sup> |
| 30: | 3132.41 | cm** <sup>-1</sup> |
| 31: | 3157.31 | cm** <sup>-1</sup> |
| 32: | 3663.76 | cm** <sup>-1</sup> |

GIBBS FREE ENERGY

The Gibbs free energy is  $G = H - T \cdot S$

|                          |     |                  |                 |
|--------------------------|-----|------------------|-----------------|
| Total enthalpy           | ... | -193.32788035 Eh |                 |
| Total entropy correction | ... | -0.03402944 Eh   | -21.35 kcal/mol |
| -----                    |     |                  |                 |
| Final Gibbs free energy  | ... | -193.36190979    |                 |



**PROPANOL C<sub>3</sub>H<sub>8</sub>O**

CARTESIAN COORDINATES (ANGSTROM)

## INPUT GEOMETRY OPTIMIZATION CYCLE

|   |           |           |           |
|---|-----------|-----------|-----------|
| C | -8.224000 | 0.622250  | 0.000000  |
| C | -5.713600 | 2.996620  | 0.000000  |
| H | -8.062390 | -0.067670 | -0.801750 |
| H | -9.170600 | 1.104030  | -0.129380 |
| H | -8.216380 | 0.095140  | 0.931130  |
| C | -3.529230 | 0.229250  | 0.000000  |
| H | -5.668840 | 3.612760  | 0.873650  |
| H | -5.656220 | 3.786460  | -0.719550 |
| O | -1.018830 | 2.800120  | 0.000000  |
| H | -3.561740 | -0.387660 | -0.873650 |
| H | -3.571450 | -0.571880 | 0.708030  |
| H | -1.184810 | 3.414100  | -0.732380 |

## FINAL GEOMETRY OPTIMIZATION CYCLE

|   |           |          |           |
|---|-----------|----------|-----------|
| C | -6.651485 | 1.382288 | -0.594038 |
| C | -5.694778 | 1.769659 | 0.535828  |
| H | -6.308008 | 1.785221 | -1.548776 |
| H | -7.658257 | 1.764563 | -0.404508 |
| H | -6.721226 | 0.293821 | -0.693737 |
| C | -4.274755 | 1.269611 | 0.318948  |
| H | -6.053579 | 1.365833 | 1.489887  |
| H | -5.663177 | 2.859308 | 0.645468  |
| O | -3.752936 | 1.894661 | -0.858331 |
| H | -4.276953 | 0.175831 | 0.202298  |
| H | -3.653591 | 1.517035 | 1.190609  |
| H | -2.869344 | 1.555689 | -1.027549 |

## VIBRATIONAL FREQUENCIES

Scaling factor for frequencies = 1.00000000 (already applied!)

|     |         |                    |
|-----|---------|--------------------|
| 0:  | 0.00    | cm** <sup>-1</sup> |
| 1:  | 0.00    | cm** <sup>-1</sup> |
| 2:  | 0.00    | cm** <sup>-1</sup> |
| 3:  | 0.00    | cm** <sup>-1</sup> |
| 4:  | 0.00    | cm** <sup>-1</sup> |
| 5:  | 0.00    | cm** <sup>-1</sup> |
| 6:  | 143.06  | cm** <sup>-1</sup> |
| 7:  | 223.17  | cm** <sup>-1</sup> |
| 8:  | 239.63  | cm** <sup>-1</sup> |
| 9:  | 325.28  | cm** <sup>-1</sup> |
| 10: | 478.13  | cm** <sup>-1</sup> |
| 11: | 774.84  | cm** <sup>-1</sup> |
| 12: | 862.37  | cm** <sup>-1</sup> |
| 13: | 926.07  | cm** <sup>-1</sup> |
| 14: | 979.19  | cm** <sup>-1</sup> |
| 15: | 1061.54 | cm** <sup>-1</sup> |
| 16: | 1108.77 | cm** <sup>-1</sup> |
| 17: | 1156.14 | cm** <sup>-1</sup> |
| 18: | 1238.73 | cm** <sup>-1</sup> |
| 19: | 1270.16 | cm** <sup>-1</sup> |
| 20: | 1321.45 | cm** <sup>-1</sup> |
| 21: | 1379.56 | cm** <sup>-1</sup> |
| 22: | 1409.35 | cm** <sup>-1</sup> |
| 23: | 1442.64 | cm** <sup>-1</sup> |
| 24: | 1477.50 | cm** <sup>-1</sup> |
| 25: | 1494.33 | cm** <sup>-1</sup> |
| 26: | 1508.52 | cm** <sup>-1</sup> |
| 27: | 1517.33 | cm** <sup>-1</sup> |
| 28: | 2969.26 | cm** <sup>-1</sup> |
| 29: | 2998.70 | cm** <sup>-1</sup> |
| 30: | 3020.62 | cm** <sup>-1</sup> |
| 31: | 3021.47 | cm** <sup>-1</sup> |

32: 3050.65 cm\*\*<sup>-1</sup>  
33: 3080.15 cm\*\*<sup>-1</sup>  
34: 3105.47 cm\*\*<sup>-1</sup>  
35: 3845.34 cm\*\*<sup>-1</sup>

GIBBS FREE ENERGY

The Gibbs free energy is  $G = H - T*S$

|                          |     |                  |                 |
|--------------------------|-----|------------------|-----------------|
| Total enthalpy           | ... | -194.19057708 Eh |                 |
| Total entropy correction | ... | -0.03425568 Eh   | -21.50 kcal/mol |
| -----                    |     |                  |                 |
| Final Gibbs free energy  | ... | -194.22483276    |                 |

**PROTONATED PROPANOL C<sub>3</sub>H<sub>9</sub>O<sup>+</sup>**  
CARTESIAN COORDINATES (ANGSTROEM)

INPUT GEOMETRY OPTIMIZATION CYCLE

|   |           |          |           |
|---|-----------|----------|-----------|
| C | -6.651440 | 1.382460 | -0.594040 |
| C | -5.694680 | 1.769850 | 0.535990  |
| H | -6.308230 | 1.786600 | -1.548370 |
| H | -7.658680 | 1.763270 | -0.404280 |
| H | -6.719780 | 0.294000 | -0.694840 |
| C | -4.274750 | 1.269390 | 0.319090  |
| H | -6.053640 | 1.366390 | 1.490150  |
| H | -5.663360 | 2.859500 | 0.645360  |
| O | -3.753340 | 1.893830 | -0.858690 |
| H | -4.277500 | 0.175670 | 0.203030  |
| H | -3.653220 | 1.517140 | 1.190270  |
| H | -2.869470 | 1.555420 | -1.027570 |
| H | -4.080580 | 1.239280 | -1.778090 |

FINAL GEOMETRY OPTIMIZATION CYCLE

|   |           |          |           |
|---|-----------|----------|-----------|
| C | -6.626012 | 1.351842 | -0.622128 |
| C | -5.695942 | 1.775574 | 0.521260  |
| H | -6.336366 | 1.779769 | -1.591697 |
| H | -7.636199 | 1.718577 | -0.436794 |
| H | -6.680467 | 0.264620 | -0.722660 |
| C | -4.307016 | 1.207871 | 0.428074  |
| H | -6.084016 | 1.400814 | 1.476399  |
| H | -5.645329 | 2.863591 | 0.618538  |
| O | -3.678129 | 1.748400 | -0.903419 |
| H | -4.265321 | 0.123336 | 0.331739  |
| H | -3.608381 | 1.584257 | 1.171485  |
| H | -2.804822 | 1.382609 | -1.133154 |
| H | -4.290669 | 1.671539 | -1.659633 |

VIBRATIONAL FREQUENCIES

Scaling factor for frequencies = 1.00000000 (already applied!)

|     |         |                    |
|-----|---------|--------------------|
| 0:  | 0.00    | cm** <sup>-1</sup> |
| 1:  | 0.00    | cm** <sup>-1</sup> |
| 2:  | 0.00    | cm** <sup>-1</sup> |
| 3:  | 0.00    | cm** <sup>-1</sup> |
| 4:  | 0.00    | cm** <sup>-1</sup> |
| 5:  | 0.00    | cm** <sup>-1</sup> |
| 6:  | 131.09  | cm** <sup>-1</sup> |
| 7:  | 196.95  | cm** <sup>-1</sup> |
| 8:  | 235.77  | cm** <sup>-1</sup> |
| 9:  | 313.43  | cm** <sup>-1</sup> |
| 10: | 444.56  | cm** <sup>-1</sup> |
| 11: | 635.11  | cm** <sup>-1</sup> |
| 12: | 688.35  | cm** <sup>-1</sup> |
| 13: | 768.51  | cm** <sup>-1</sup> |
| 14: | 852.05  | cm** <sup>-1</sup> |
| 15: | 921.45  | cm** <sup>-1</sup> |
| 16: | 967.27  | cm** <sup>-1</sup> |
| 17: | 1032.03 | cm** <sup>-1</sup> |
| 18: | 1134.70 | cm** <sup>-1</sup> |
| 19: | 1153.24 | cm** <sup>-1</sup> |
| 20: | 1253.73 | cm** <sup>-1</sup> |
| 21: | 1298.33 | cm** <sup>-1</sup> |
| 22: | 1378.31 | cm** <sup>-1</sup> |
| 23: | 1410.01 | cm** <sup>-1</sup> |
| 24: | 1432.33 | cm** <sup>-1</sup> |
| 25: | 1465.93 | cm** <sup>-1</sup> |
| 26: | 1485.24 | cm** <sup>-1</sup> |
| 27: | 1494.35 | cm** <sup>-1</sup> |
| 28: | 1511.90 | cm** <sup>-1</sup> |
| 29: | 1643.83 | cm** <sup>-1</sup> |

30: 2996.19 cm\*\*<sup>-1</sup>  
31: 3035.98 cm\*\*<sup>-1</sup>  
32: 3069.49 cm\*\*<sup>-1</sup>  
33: 3086.29 cm\*\*<sup>-1</sup>  
34: 3101.48 cm\*\*<sup>-1</sup>  
35: 3123.21 cm\*\*<sup>-1</sup>  
36: 3182.77 cm\*\*<sup>-1</sup>  
37: 3638.85 cm\*\*<sup>-1</sup>  
38: 3732.55 cm\*\*<sup>-1</sup>

#### GIBBS FREE ENERGY

The Gibbs free energy is  $G = H - T \cdot S$

|                          |     |                  |                 |
|--------------------------|-----|------------------|-----------------|
| Total enthalpy           | ... | -194.48710792 Eh |                 |
| Total entropy correction | ... | -0.03497473 Eh   | -21.95 kcal/mol |
| -----                    |     |                  |                 |
| Final Gibbs free energy  | ... | -194.52208264    |                 |

## 2-BUTENAL C<sub>4</sub>H<sub>6</sub>O

CARTESIAN COORDINATES (ANGSTROM)

### INPUT GEOMETRY OPTIMIZATION CYCLE

|   |           |           |           |
|---|-----------|-----------|-----------|
| C | -5.884730 | 1.584110  | 0.007920  |
| C | -4.624080 | 0.816000  | 0.039200  |
| C | -3.439970 | 1.439000  | -0.036680 |
| C | -2.138420 | 0.705760  | -0.005320 |
| H | -2.156130 | -0.111910 | 0.722220  |
| H | -1.333300 | 1.388840  | 0.283750  |
| H | -1.902780 | 0.303120  | -0.994920 |
| H | -4.721570 | -0.261090 | 0.113110  |
| H | -3.384150 | 2.521740  | -0.123640 |
| O | -6.972130 | 1.023690  | 0.036870  |
| H | -5.788740 | 2.681580  | -0.042510 |

### FINAL GEOMETRY OPTIMIZATION CYCLE

|   |           |           |           |
|---|-----------|-----------|-----------|
| C | -5.888147 | 1.575900  | 0.019316  |
| C | -4.641512 | 0.813237  | 0.145493  |
| C | -3.455968 | 1.382544  | -0.109084 |
| C | -2.126157 | 0.709675  | -0.020795 |
| H | -2.215718 | -0.332768 | 0.290060  |
| H | -1.476415 | 1.232214  | 0.690210  |
| H | -1.614442 | 0.742627  | -0.989323 |
| H | -4.728892 | -0.226260 | 0.449699  |
| H | -3.447633 | 2.430405  | -0.410461 |
| O | -6.995990 | 1.126411  | 0.222502  |
| H | -5.755126 | 2.636856  | -0.287616 |

### VIBRATIONAL FREQUENCIES

Scaling factor for frequencies = 1.00000000 (already applied!)

|     |         |                    |
|-----|---------|--------------------|
| 0:  | 0.00    | cm** <sup>-1</sup> |
| 1:  | 0.00    | cm** <sup>-1</sup> |
| 2:  | 0.00    | cm** <sup>-1</sup> |
| 3:  | 0.00    | cm** <sup>-1</sup> |
| 4:  | 0.00    | cm** <sup>-1</sup> |
| 5:  | 0.00    | cm** <sup>-1</sup> |
| 6:  | 126.72  | cm** <sup>-1</sup> |
| 7:  | 197.70  | cm** <sup>-1</sup> |
| 8:  | 209.46  | cm** <sup>-1</sup> |
| 9:  | 295.01  | cm** <sup>-1</sup> |
| 10: | 461.57  | cm** <sup>-1</sup> |
| 11: | 544.56  | cm** <sup>-1</sup> |
| 12: | 797.61  | cm** <sup>-1</sup> |
| 13: | 942.42  | cm** <sup>-1</sup> |
| 14: | 1002.19 | cm** <sup>-1</sup> |
| 15: | 1026.63 | cm** <sup>-1</sup> |
| 16: | 1070.17 | cm** <sup>-1</sup> |
| 17: | 1093.13 | cm** <sup>-1</sup> |
| 18: | 1166.00 | cm** <sup>-1</sup> |
| 19: | 1279.96 | cm** <sup>-1</sup> |
| 20: | 1328.00 | cm** <sup>-1</sup> |
| 21: | 1409.31 | cm** <sup>-1</sup> |
| 22: | 1416.00 | cm** <sup>-1</sup> |
| 23: | 1476.30 | cm** <sup>-1</sup> |
| 24: | 1482.85 | cm** <sup>-1</sup> |
| 25: | 1696.63 | cm** <sup>-1</sup> |
| 26: | 1760.22 | cm** <sup>-1</sup> |
| 27: | 2867.66 | cm** <sup>-1</sup> |
| 28: | 3015.14 | cm** <sup>-1</sup> |
| 29: | 3058.45 | cm** <sup>-1</sup> |
| 30: | 3099.84 | cm** <sup>-1</sup> |
| 31: | 3117.48 | cm** <sup>-1</sup> |
| 32: | 3157.47 | cm** <sup>-1</sup> |

GIBBS FREE ENERGY

The Gibbs free energy is  $G = H - T \cdot S$

|                          |     |                  |                 |
|--------------------------|-----|------------------|-----------------|
| Total enthalpy           | ... | -231.08172136 Eh |                 |
| Total entropy correction | ... | -0.03540424 Eh   | -22.22 kcal/mol |
| -----                    |     |                  |                 |
| Final Gibbs free energy  | ... | -231.11712560    |                 |

**PROTONATED 2-BUTENAL C<sub>4</sub>H<sub>6</sub>O<sup>+</sup>**  
CARTESIAN COORDINATES (ANGSTROM)

INPUT GEOMETRY OPTIMIZATION CYCLE

|   |           |           |           |
|---|-----------|-----------|-----------|
| C | -5.888100 | 1.575870  | 0.019440  |
| C | -4.641300 | 0.813400  | 0.145310  |
| C | -3.455800 | 1.382770  | -0.109220 |
| C | -2.126190 | 0.709700  | -0.020910 |
| H | -2.216250 | -0.332710 | 0.290000  |
| H | -1.476710 | 1.231960  | 0.690560  |
| H | -1.614200 | 0.742420  | -0.989290 |
| H | -4.728750 | -0.226070 | 0.449580  |
| H | -3.447360 | 2.430630  | -0.410610 |
| O | -6.995790 | 1.126070  | 0.222900  |
| H | -5.755540 | 2.636800  | -0.287760 |
| H | -6.840770 | 0.091670  | 0.514260  |

FINAL GEOMETRY OPTIMIZATION CYCLE

|   |           |           |           |
|---|-----------|-----------|-----------|
| C | -5.797987 | 1.534428  | 0.024174  |
| C | -4.632651 | 0.773098  | 0.155288  |
| C | -3.427330 | 1.369141  | -0.107688 |
| C | -2.116531 | 0.713555  | -0.022253 |
| H | -2.167562 | -0.330362 | 0.283317  |
| H | -1.475682 | 1.276844  | 0.670797  |
| H | -1.609765 | 0.795066  | -0.994479 |
| H | -4.691101 | -0.268766 | 0.458126  |
| H | -3.430929 | 2.416956  | -0.407190 |
| O | -7.002436 | 1.127763  | 0.228775  |
| H | -5.761077 | 2.579277  | -0.277196 |
| H | -7.073709 | 0.195511  | 0.502587  |

VIBRATIONAL FREQUENCIES

Scaling factor for frequencies = 1.00000000 (already applied!)

|     |         |                     |
|-----|---------|---------------------|
| 0:  | 0.00    | cm <sup>**</sup> -1 |
| 1:  | 0.00    | cm <sup>**</sup> -1 |
| 2:  | 0.00    | cm <sup>**</sup> -1 |
| 3:  | 0.00    | cm <sup>**</sup> -1 |
| 4:  | 0.00    | cm <sup>**</sup> -1 |
| 5:  | 0.00    | cm <sup>**</sup> -1 |
| 6:  | 128.27  | cm <sup>**</sup> -1 |
| 7:  | 183.18  | cm <sup>**</sup> -1 |
| 8:  | 210.41  | cm <sup>**</sup> -1 |
| 9:  | 312.96  | cm <sup>**</sup> -1 |
| 10: | 465.45  | cm <sup>**</sup> -1 |
| 11: | 522.44  | cm <sup>**</sup> -1 |
| 12: | 702.32  | cm <sup>**</sup> -1 |
| 13: | 838.80  | cm <sup>**</sup> -1 |
| 14: | 934.39  | cm <sup>**</sup> -1 |
| 15: | 962.46  | cm <sup>**</sup> -1 |
| 16: | 1047.24 | cm <sup>**</sup> -1 |
| 17: | 1081.50 | cm <sup>**</sup> -1 |
| 18: | 1150.91 | cm <sup>**</sup> -1 |
| 19: | 1162.49 | cm <sup>**</sup> -1 |
| 20: | 1281.42 | cm <sup>**</sup> -1 |
| 21: | 1303.25 | cm <sup>**</sup> -1 |
| 22: | 1350.02 | cm <sup>**</sup> -1 |
| 23: | 1373.33 | cm <sup>**</sup> -1 |
| 24: | 1421.79 | cm <sup>**</sup> -1 |
| 25: | 1442.16 | cm <sup>**</sup> -1 |
| 26: | 1464.75 | cm <sup>**</sup> -1 |
| 27: | 1579.38 | cm <sup>**</sup> -1 |
| 28: | 1639.43 | cm <sup>**</sup> -1 |
| 29: | 3000.01 | cm <sup>**</sup> -1 |
| 30: | 3033.77 | cm <sup>**</sup> -1 |
| 31: | 3130.41 | cm <sup>**</sup> -1 |

32: 3147.53 cm\*\*<sup>-1</sup>  
33: 3161.44 cm\*\*<sup>-1</sup>  
34: 3173.52 cm\*\*<sup>-1</sup>  
35: 3688.84 cm\*\*<sup>-1</sup>

GIBBS FREE ENERGY

The Gibbs free energy is  $G = H - T*S$

|                          |     |                  |                 |
|--------------------------|-----|------------------|-----------------|
| Total enthalpy           | ... | -231.39889650 Eh |                 |
| Total entropy correction | ... | -0.03564902 Eh   | -22.37 kcal/mol |
| -----                    |     |                  |                 |
| Final Gibbs free energy  | ... | -231.43454552    |                 |



**TRANS-2-HEPTANAL C<sub>7</sub>H<sub>12</sub>O**  
CARTESIAN COORDINATES (ANGSTROEM)

INPUT GEOMETRY OPTIMIZATION CYCLE

|   |           |           |           |
|---|-----------|-----------|-----------|
| C | -4.539210 | 0.216170  | 0.012540  |
| C | -3.193480 | -0.390030 | 0.000100  |
| C | -2.086170 | 0.366750  | -0.016930 |
| C | -0.714950 | -0.250110 | -0.041840 |
| C | 0.410100  | 0.788060  | 0.014770  |
| H | -0.609420 | -0.839950 | -0.960660 |
| H | -0.612820 | -0.934320 | 0.809590  |
| C | 1.778080  | 0.104230  | -0.038540 |
| H | 0.327860  | 1.378880  | 0.935740  |
| H | 0.315280  | 1.486980  | -0.825840 |
| C | 2.918190  | 1.108410  | -0.002070 |
| H | 1.857950  | -0.492980 | -0.954510 |
| H | 1.880930  | -0.585870 | 0.807100  |
| H | 2.862030  | 1.798190  | -0.850040 |
| H | 3.880070  | 0.587910  | -0.051930 |
| H | 2.896950  | 1.694160  | 0.922170  |
| H | -3.162260 | -1.473980 | -0.000440 |
| H | -2.157820 | 1.452120  | -0.021090 |
| O | -5.547780 | -0.477900 | 0.019070  |
| H | -4.581890 | 1.317620  | 0.013750  |

FINAL GEOMETRY OPTIMIZATION CYCLE

|   |           |           |           |
|---|-----------|-----------|-----------|
| C | -4.415771 | 0.367508  | 0.253079  |
| C | -3.093731 | -0.262274 | 0.328974  |
| C | -2.088585 | 0.142103  | -0.459005 |
| C | -0.697533 | -0.402800 | -0.453488 |
| C | 0.345950  | 0.661743  | -0.065711 |
| H | -0.458856 | -0.776587 | -1.458418 |
| H | -0.631338 | -1.256070 | 0.228874  |
| C | 1.780106  | 0.126170  | -0.095231 |
| H | 0.114367  | 1.040289  | 0.936662  |
| H | 0.261088  | 1.518528  | -0.745806 |
| C | 2.816761  | 1.182027  | 0.295745  |
| H | 2.002844  | -0.254757 | -1.099401 |
| H | 1.858020  | -0.733075 | 0.581798  |
| H | 2.784850  | 2.038098  | -0.385664 |
| H | 3.830576  | 0.773440  | 0.269541  |
| H | 2.635492  | 1.557514  | 1.307788  |
| H | -2.972109 | -1.064876 | 1.051358  |
| H | -2.281716 | 0.957091  | -1.158386 |
| O | -5.367463 | 0.059276  | 0.939111  |
| H | -4.501313 | 1.180993  | -0.500879 |

VIBRATIONAL FREQUENCIES

Scaling factor for frequencies = 1.00000000 (already applied!)

|     |        |                    |
|-----|--------|--------------------|
| 0:  | 0.00   | cm** <sup>-1</sup> |
| 1:  | 0.00   | cm** <sup>-1</sup> |
| 2:  | 0.00   | cm** <sup>-1</sup> |
| 3:  | 0.00   | cm** <sup>-1</sup> |
| 4:  | 0.00   | cm** <sup>-1</sup> |
| 5:  | 0.00   | cm** <sup>-1</sup> |
| 6:  | 43.74  | cm** <sup>-1</sup> |
| 7:  | 72.38  | cm** <sup>-1</sup> |
| 8:  | 105.57 | cm** <sup>-1</sup> |
| 9:  | 136.11 | cm** <sup>-1</sup> |
| 10: | 159.19 | cm** <sup>-1</sup> |
| 11: | 218.36 | cm** <sup>-1</sup> |
| 12: | 243.25 | cm** <sup>-1</sup> |
| 13: | 266.33 | cm** <sup>-1</sup> |
| 14: | 323.34 | cm** <sup>-1</sup> |
| 15: | 435.12 | cm** <sup>-1</sup> |

16: 502.92 cm\*\*-1  
 17: 569.89 cm\*\*-1  
 18: 738.80 cm\*\*-1  
 19: 795.21 cm\*\*-1  
 20: 836.59 cm\*\*-1  
 21: 904.39 cm\*\*-1  
 22: 939.14 cm\*\*-1  
 23: 1000.70 cm\*\*-1  
 24: 1007.43 cm\*\*-1  
 25: 1030.18 cm\*\*-1  
 26: 1046.41 cm\*\*-1  
 27: 1058.29 cm\*\*-1  
 28: 1110.27 cm\*\*-1  
 29: 1121.56 cm\*\*-1  
 30: 1175.83 cm\*\*-1  
 31: 1227.15 cm\*\*-1  
 32: 1265.73 cm\*\*-1  
 33: 1288.95 cm\*\*-1  
 34: 1318.87 cm\*\*-1  
 35: 1324.00 cm\*\*-1  
 36: 1336.02 cm\*\*-1  
 37: 1358.17 cm\*\*-1  
 38: 1392.96 cm\*\*-1  
 39: 1414.06 cm\*\*-1  
 40: 1417.32 cm\*\*-1  
 41: 1480.78 cm\*\*-1  
 42: 1488.14 cm\*\*-1  
 43: 1498.12 cm\*\*-1  
 44: 1499.46 cm\*\*-1  
 45: 1510.77 cm\*\*-1  
 46: 1691.74 cm\*\*-1  
 47: 1758.87 cm\*\*-1  
 48: 2867.53 cm\*\*-1  
 49: 2997.77 cm\*\*-1  
 50: 3002.20 cm\*\*-1  
 51: 3010.57 cm\*\*-1  
 52: 3018.56 cm\*\*-1  
 53: 3024.35 cm\*\*-1  
 54: 3043.03 cm\*\*-1  
 55: 3061.99 cm\*\*-1  
 56: 3079.61 cm\*\*-1  
 57: 3085.13 cm\*\*-1  
 58: 3104.01 cm\*\*-1  
 59: 3156.70 cm\*\*-1

GIBBS FREE ENERGY

The Gibbs free energy is  $G = H - T*S$

|                          |     |                  |                 |
|--------------------------|-----|------------------|-----------------|
| Total enthalpy           | ... | -348.89053871 Eh |                 |
| Total entropy correction | ... | -0.04525931 Eh   | -28.40 kcal/mol |
| -----                    |     |                  |                 |
| Final Gibbs free energy  | ... | -348.93579802    |                 |

**PROTONATED TRANS-2-HEPTANAL C<sub>7</sub>H<sub>12</sub>O<sup>+</sup>**  
CARTESIAN COORDINATES (ANGSTROEM)

INPUT GEOMETRY OPTIMIZATION CYCLE

|   |           |           |           |
|---|-----------|-----------|-----------|
| C | -4.414400 | 0.368230  | 0.255490  |
| C | -3.092160 | -0.261340 | 0.329720  |
| C | -2.088650 | 0.141130  | -0.461320 |
| C | -0.697470 | -0.403340 | -0.456250 |
| C | 0.345570  | 0.661750  | -0.068520 |
| H | -0.458430 | -0.777880 | -1.460760 |
| H | -0.630940 | -1.256110 | 0.226750  |
| C | 1.779830  | 0.126430  | -0.095940 |
| H | 0.112740  | 1.040830  | 0.933380  |
| H | 0.261160  | 1.518110  | -0.749190 |
| C | 2.815630  | 1.181770  | 0.298490  |
| H | 2.004510  | -0.253410 | -1.100100 |
| H | 1.856340  | -0.733680 | 0.580180  |
| H | 2.785480  | 2.038620  | -0.382040 |
| H | 3.829520  | 0.773240  | 0.274360  |
| H | 2.631900  | 1.556230  | 1.310480  |
| H | -2.969030 | -1.062020 | 1.053980  |
| H | -2.283680 | 0.954370  | -1.162220 |
| O | -5.364120 | 0.061990  | 0.945120  |
| H | -4.502150 | 1.179430  | -0.500690 |
| H | -4.798430 | -0.666120 | 0.040150  |

FINAL GEOMETRY OPTIMIZATION CYCLE

|   |           |           |           |
|---|-----------|-----------|-----------|
| C | -4.262599 | 0.369087  | 0.030411  |
| C | -3.033132 | -0.271151 | 0.169325  |
| C | -2.005919 | 0.078842  | -0.673106 |
| C | -0.646342 | -0.459170 | -0.625149 |
| C | 0.332354  | 0.653226  | -0.105618 |
| H | -0.326318 | -0.721721 | -1.640730 |
| H | -0.579679 | -1.343652 | 0.011002  |
| C | 1.777847  | 0.140127  | -0.079659 |
| H | 0.022935  | 0.959135  | 0.898400  |
| H | 0.257745  | 1.533530  | -0.751846 |
| C | 2.745788  | 1.201944  | 0.447580  |
| H | 2.069407  | -0.163822 | -1.090712 |
| H | 1.832889  | -0.756767 | 0.546607  |
| H | 2.738942  | 2.096599  | -0.181284 |
| H | 3.766879  | 0.814029  | 0.461641  |
| H | 2.491754  | 1.502930  | 1.467932  |
| H | -2.897630 | -1.040447 | 0.924789  |
| H | -2.198894 | 0.855401  | -1.413462 |
| O | -5.326046 | 0.143319  | 0.727000  |
| H | -4.418439 | 1.142093  | -0.718844 |
| H | -5.218323 | -0.545302 | 1.406793  |

VIBRATIONAL FREQUENCIES

Scaling factor for frequencies = 1.00000000 (already applied!)

|     |        |                    |
|-----|--------|--------------------|
| 0:  | 0.00   | cm** <sup>-1</sup> |
| 1:  | 0.00   | cm** <sup>-1</sup> |
| 2:  | 0.00   | cm** <sup>-1</sup> |
| 3:  | 0.00   | cm** <sup>-1</sup> |
| 4:  | 0.00   | cm** <sup>-1</sup> |
| 5:  | 0.00   | cm** <sup>-1</sup> |
| 6:  | 38.51  | cm** <sup>-1</sup> |
| 7:  | 66.31  | cm** <sup>-1</sup> |
| 8:  | 104.77 | cm** <sup>-1</sup> |
| 9:  | 138.08 | cm** <sup>-1</sup> |
| 10: | 163.94 | cm** <sup>-1</sup> |
| 11: | 217.86 | cm** <sup>-1</sup> |
| 12: | 240.13 | cm** <sup>-1</sup> |
| 13: | 262.40 | cm** <sup>-1</sup> |

14: 338.85 cm\*\*-1  
15: 434.95 cm\*\*-1  
16: 496.61 cm\*\*-1  
17: 546.70 cm\*\*-1  
18: 705.53 cm\*\*-1  
19: 742.86 cm\*\*-1  
20: 808.88 cm\*\*-1  
21: 861.34 cm\*\*-1  
22: 910.77 cm\*\*-1  
23: 925.55 cm\*\*-1  
24: 950.82 cm\*\*-1  
25: 985.66 cm\*\*-1  
26: 1033.63 cm\*\*-1  
27: 1050.34 cm\*\*-1  
28: 1070.01 cm\*\*-1  
29: 1095.36 cm\*\*-1  
30: 1163.71 cm\*\*-1  
31: 1173.39 cm\*\*-1  
32: 1214.74 cm\*\*-1  
33: 1244.16 cm\*\*-1  
34: 1279.99 cm\*\*-1  
35: 1289.70 cm\*\*-1  
36: 1316.64 cm\*\*-1  
37: 1326.57 cm\*\*-1  
38: 1338.42 cm\*\*-1  
39: 1350.56 cm\*\*-1  
40: 1374.53 cm\*\*-1  
41: 1415.86 cm\*\*-1  
42: 1418.85 cm\*\*-1  
43: 1481.73 cm\*\*-1  
44: 1488.26 cm\*\*-1  
45: 1495.81 cm\*\*-1  
46: 1496.72 cm\*\*-1  
47: 1509.12 cm\*\*-1  
48: 1570.31 cm\*\*-1  
49: 1628.79 cm\*\*-1  
50: 3019.05 cm\*\*-1  
51: 3022.49 cm\*\*-1  
52: 3028.30 cm\*\*-1  
53: 3035.88 cm\*\*-1  
54: 3048.98 cm\*\*-1  
55: 3075.77 cm\*\*-1  
56: 3094.40 cm\*\*-1  
57: 3101.04 cm\*\*-1  
58: 3101.97 cm\*\*-1  
59: 3133.64 cm\*\*-1  
60: 3159.19 cm\*\*-1  
61: 3175.53 cm\*\*-1  
62: 3695.28 cm\*\*-1

GIBBS FREE ENERGY

Total enthalpy ... -349.21225871 Eh  
Total entropy correction ... -0.04554981 Eh -28.58 kcal/mol  
-----  
Final Gibbs free energy ... -349.25780852

**2-HEPTANONE C<sub>7</sub>H<sub>14</sub>O**

CARTESIAN COORDINATES (ANGSTROM)

## INPUT GEOMETRY OPTIMIZATION CYCLE

|   |           |           |           |
|---|-----------|-----------|-----------|
| C | -5.561790 | 0.960400  | -0.005870 |
| C | -4.207470 | 1.618790  | 0.030200  |
| H | -5.759660 | 0.587770  | -1.013550 |
| H | -6.330590 | 1.688810  | 0.267800  |
| H | -5.594540 | 0.138640  | 0.713710  |
| C | -3.003130 | 0.693410  | -0.030160 |
| C | -1.685470 | 1.464290  | 0.018610  |
| H | -3.066820 | 0.113790  | -0.957560 |
| H | -3.064300 | 0.004150  | 0.819300  |
| C | -0.470590 | 0.535830  | -0.024190 |
| H | -1.650340 | 2.070120  | 0.932810  |
| H | -1.640290 | 2.164850  | -0.824660 |
| C | 0.828970  | 1.340960  | 0.035680  |
| H | -0.493480 | -0.061840 | -0.943460 |
| H | -0.510150 | -0.164280 | 0.819100  |
| C | 2.056520  | 0.445470  | -0.000520 |
| H | 0.851150  | 1.940240  | 0.953470  |
| H | 0.871260  | 2.040080  | -0.807760 |
| H | 2.061360  | -0.250470 | 0.844220  |
| H | 2.966490  | 1.051770  | 0.054840  |
| H | 2.092430  | -0.135510 | -0.927380 |
| O | -4.104440 | 2.844660  | 0.073560  |

## FINAL GEOMETRY OPTIMIZATION CYCLE

|   |           |           |           |
|---|-----------|-----------|-----------|
| C | -5.578732 | 0.932425  | -0.078561 |
| C | -4.246411 | 1.634434  | 0.106799  |
| H | -5.668395 | 0.585256  | -1.113520 |
| H | -6.395803 | 1.618767  | 0.141654  |
| H | -5.647912 | 0.048722  | 0.562875  |
| C | -3.008261 | 0.752921  | 0.038488  |
| C | -1.685381 | 1.514334  | 0.044662  |
| H | -3.090896 | 0.114117  | -0.850917 |
| H | -3.059580 | 0.060665  | 0.891040  |
| C | -0.469345 | 0.585576  | 0.003638  |
| H | -1.640761 | 2.149505  | 0.934680  |
| H | -1.660242 | 2.198123  | -0.810640 |
| C | 0.865423  | 1.336766  | 0.001961  |
| H | -0.523447 | -0.053313 | -0.888250 |
| H | -0.498384 | -0.094560 | 0.865681  |
| C | 2.079422  | 0.405015  | -0.030385 |
| H | 0.918096  | 1.977619  | 0.890441  |
| H | 0.896672  | 2.011624  | -0.862085 |
| H | 2.090828  | -0.258237 | 0.840731  |
| H | 3.016612  | 0.968590  | -0.031102 |
| H | 2.069869  | -0.225852 | -0.925251 |
| O | -4.178251 | 2.829431  | 0.296251  |

## VIBRATIONAL FREQUENCIES

Scaling factor for frequencies = 1.00000000 (already applied!)

|     |        |        |
|-----|--------|--------|
| 0:  | 0.00   | cm**-1 |
| 1:  | 0.00   | cm**-1 |
| 2:  | 0.00   | cm**-1 |
| 3:  | 0.00   | cm**-1 |
| 4:  | 0.00   | cm**-1 |
| 5:  | 0.00   | cm**-1 |
| 6:  | 34.08  | cm**-1 |
| 7:  | 55.26  | cm**-1 |
| 8:  | 86.87  | cm**-1 |
| 9:  | 95.99  | cm**-1 |
| 10: | 118.46 | cm**-1 |
| 11: | 132.75 | cm**-1 |

12: 225.16 cm\*\*<sup>-1</sup>  
 13: 244.15 cm\*\*<sup>-1</sup>  
 14: 288.73 cm\*\*<sup>-1</sup>  
 15: 401.93 cm\*\*<sup>-1</sup>  
 16: 459.99 cm\*\*<sup>-1</sup>  
 17: 477.38 cm\*\*<sup>-1</sup>  
 18: 601.43 cm\*\*<sup>-1</sup>  
 19: 723.69 cm\*\*<sup>-1</sup>  
 20: 747.76 cm\*\*<sup>-1</sup>  
 21: 818.32 cm\*\*<sup>-1</sup>  
 22: 827.83 cm\*\*<sup>-1</sup>  
 23: 909.17 cm\*\*<sup>-1</sup>  
 24: 931.21 cm\*\*<sup>-1</sup>  
 25: 942.96 cm\*\*<sup>-1</sup>  
 26: 1009.22 cm\*\*<sup>-1</sup>  
 27: 1025.55 cm\*\*<sup>-1</sup>  
 28: 1061.58 cm\*\*<sup>-1</sup>  
 29: 1067.83 cm\*\*<sup>-1</sup>  
 30: 1133.56 cm\*\*<sup>-1</sup>  
 31: 1147.67 cm\*\*<sup>-1</sup>  
 32: 1178.12 cm\*\*<sup>-1</sup>  
 33: 1225.46 cm\*\*<sup>-1</sup>  
 34: 1272.42 cm\*\*<sup>-1</sup>  
 35: 1291.34 cm\*\*<sup>-1</sup>  
 36: 1328.21 cm\*\*<sup>-1</sup>  
 37: 1333.59 cm\*\*<sup>-1</sup>  
 38: 1342.71 cm\*\*<sup>-1</sup>  
 39: 1383.04 cm\*\*<sup>-1</sup>  
 40: 1393.65 cm\*\*<sup>-1</sup>  
 41: 1403.09 cm\*\*<sup>-1</sup>  
 42: 1413.08 cm\*\*<sup>-1</sup>  
 43: 1451.40 cm\*\*<sup>-1</sup>  
 44: 1466.20 cm\*\*<sup>-1</sup>  
 45: 1476.84 cm\*\*<sup>-1</sup>  
 46: 1485.42 cm\*\*<sup>-1</sup>  
 47: 1489.55 cm\*\*<sup>-1</sup>  
 48: 1499.08 cm\*\*<sup>-1</sup>  
 49: 1500.66 cm\*\*<sup>-1</sup>  
 50: 1511.45 cm\*\*<sup>-1</sup>  
 51: 1781.54 cm\*\*<sup>-1</sup>  
 52: 2986.94 cm\*\*<sup>-1</sup>  
 53: 2996.28 cm\*\*<sup>-1</sup>  
 54: 3005.98 cm\*\*<sup>-1</sup>  
 55: 3007.95 cm\*\*<sup>-1</sup>  
 56: 3014.98 cm\*\*<sup>-1</sup>  
 57: 3019.92 cm\*\*<sup>-1</sup>  
 58: 3026.57 cm\*\*<sup>-1</sup>  
 59: 3030.65 cm\*\*<sup>-1</sup>  
 60: 3036.24 cm\*\*<sup>-1</sup>  
 61: 3069.07 cm\*\*<sup>-1</sup>  
 62: 3075.42 cm\*\*<sup>-1</sup>  
 63: 3081.24 cm\*\*<sup>-1</sup>  
 64: 3082.36 cm\*\*<sup>-1</sup>  
 65: 3134.65 cm\*\*<sup>-1</sup>

GIBBS FREE ENERGY

The Gibbs free energy is  $G = H - T \cdot S$

|                          |     |                  |                 |
|--------------------------|-----|------------------|-----------------|
| Total enthalpy           | ... | -350.09866777 Eh |                 |
| Total entropy correction | ... | -0.04713281 Eh   | -29.58 kcal/mol |
| -----                    |     |                  |                 |
| Final Gibbs free energy  | ... | -350.14580057    |                 |

**PROTONATED 2-HEPTANONE C<sub>7</sub>H<sub>14</sub>O<sup>+</sup>**  
CARTESIAN COORDINATES (ANGSTROM)

INPUT GEOMETRY OPTIMIZATION CYCLE

|   |           |           |           |
|---|-----------|-----------|-----------|
| C | -5.578810 | 0.933140  | -0.073220 |
| C | -4.245790 | 1.633830  | 0.109740  |
| H | -5.675040 | 0.597860  | -1.111620 |
| H | -6.394890 | 1.616500  | 0.159450  |
| H | -5.642970 | 0.041780  | 0.557970  |
| C | -3.008270 | 0.752540  | 0.031860  |
| C | -1.685360 | 1.513550  | 0.040270  |
| H | -3.094380 | 0.121010  | -0.862500 |
| H | -3.057650 | 0.052530  | 0.878160  |
| C | -0.469050 | 0.585110  | 0.002750  |
| H | -1.643050 | 2.149800  | 0.929640  |
| H | -1.658410 | 2.196710  | -0.815530 |
| C | 0.865320  | 1.336980  | -0.000580 |
| H | -0.522350 | -0.056900 | -0.886950 |
| H | -0.498430 | -0.092360 | 0.866880  |
| C | 2.079460  | 0.405520  | -0.024510 |
| H | 0.915660  | 1.983670  | 0.883800  |
| H | 0.898220  | 2.006500  | -0.868720 |
| H | 2.089180  | -0.252490 | 0.850610  |
| H | 3.016600  | 0.969210  | -0.026670 |
| H | 2.072050  | -0.230960 | -0.915430 |
| O | -4.176890 | 2.828390  | 0.302800  |
| H | -5.023640 | 3.793280  | 0.238820  |

FINAL GEOMETRY OPTIMIZATION CYCLE

|   |           |           |           |
|---|-----------|-----------|-----------|
| C | -5.564783 | 0.984957  | -0.168321 |
| C | -4.245738 | 1.582681  | 0.118842  |
| H | -5.662215 | 0.936066  | -1.263628 |
| H | -6.397064 | 1.572158  | 0.225880  |
| H | -5.613304 | -0.043059 | 0.195486  |
| C | -3.004971 | 0.796986  | 0.115257  |
| C | -1.679280 | 1.561900  | 0.039523  |
| H | -3.100209 | 0.029566  | -0.664710 |
| H | -3.064820 | 0.213190  | 1.054986  |
| C | -0.481940 | 0.605593  | 0.041393  |
| H | -1.605846 | 2.254615  | 0.882487  |
| H | -1.668004 | 2.171134  | -0.870398 |
| C | 0.858438  | 1.343415  | -0.041888 |
| H | -0.566097 | -0.090597 | -0.802586 |
| H | -0.504488 | -0.007446 | 0.951325  |
| C | 2.055931  | 0.391040  | -0.042511 |
| H | 0.939840  | 2.038460  | 0.802030  |
| H | 0.875688  | 1.957991  | -0.949726 |
| H | 2.084317  | -0.211880 | 0.870016  |
| H | 2.995730  | 0.943888  | -0.103618 |
| H | 2.018256  | -0.294079 | -0.894756 |
| O | -4.130978 | 2.832321  | 0.372483  |
| H | -4.976953 | 3.316299  | 0.399455  |

VIBRATIONAL FREQUENCIES

Scaling factor for frequencies = 1.00000000 (already applied!)

|    |        |                    |
|----|--------|--------------------|
| 0: | 0.00   | cm** <sup>-1</sup> |
| 1: | 0.00   | cm** <sup>-1</sup> |
| 2: | 0.00   | cm** <sup>-1</sup> |
| 3: | 0.00   | cm** <sup>-1</sup> |
| 4: | 0.00   | cm** <sup>-1</sup> |
| 5: | 0.00   | cm** <sup>-1</sup> |
| 6: | 41.67  | cm** <sup>-1</sup> |
| 7: | 55.11  | cm** <sup>-1</sup> |
| 8: | 95.65  | cm** <sup>-1</sup> |
| 9: | 104.58 | cm** <sup>-1</sup> |

10: 131.35 cm\*\*-1  
 11: 144.17 cm\*\*-1  
 12: 224.48 cm\*\*-1  
 13: 243.49 cm\*\*-1  
 14: 292.88 cm\*\*-1  
 15: 401.13 cm\*\*-1  
 16: 447.55 cm\*\*-1  
 17: 469.10 cm\*\*-1  
 18: 584.77 cm\*\*-1  
 19: 675.19 cm\*\*-1  
 20: 736.24 cm\*\*-1  
 21: 763.04 cm\*\*-1  
 22: 832.00 cm\*\*-1  
 23: 855.97 cm\*\*-1  
 24: 914.37 cm\*\*-1  
 25: 949.82 cm\*\*-1  
 26: 975.94 cm\*\*-1  
 27: 1004.13 cm\*\*-1  
 28: 1028.06 cm\*\*-1  
 29: 1043.76 cm\*\*-1  
 30: 1063.40 cm\*\*-1  
 31: 1112.02 cm\*\*-1  
 32: 1131.82 cm\*\*-1  
 33: 1150.84 cm\*\*-1  
 34: 1217.58 cm\*\*-1  
 35: 1253.21 cm\*\*-1  
 36: 1281.01 cm\*\*-1  
 37: 1317.84 cm\*\*-1  
 38: 1332.93 cm\*\*-1  
 39: 1339.06 cm\*\*-1  
 40: 1374.23 cm\*\*-1  
 41: 1379.13 cm\*\*-1  
 42: 1386.50 cm\*\*-1  
 43: 1401.99 cm\*\*-1  
 44: 1420.88 cm\*\*-1  
 45: 1421.56 cm\*\*-1  
 46: 1467.21 cm\*\*-1  
 47: 1483.54 cm\*\*-1  
 48: 1487.23 cm\*\*-1  
 49: 1490.05 cm\*\*-1  
 50: 1500.16 cm\*\*-1  
 51: 1501.37 cm\*\*-1  
 52: 1511.65 cm\*\*-1  
 53: 1563.48 cm\*\*-1  
 54: 2939.39 cm\*\*-1  
 55: 2999.57 cm\*\*-1  
 56: 3004.26 cm\*\*-1  
 57: 3012.56 cm\*\*-1  
 58: 3023.40 cm\*\*-1  
 59: 3026.18 cm\*\*-1  
 60: 3027.86 cm\*\*-1  
 61: 3036.50 cm\*\*-1  
 62: 3047.79 cm\*\*-1  
 63: 3082.08 cm\*\*-1  
 64: 3083.81 cm\*\*-1  
 65: 3087.39 cm\*\*-1  
 66: 3101.01 cm\*\*-1  
 67: 3134.41 cm\*\*-1  
 68: 3672.72 cm\*\*-1

GIBBS FREE ENERGY

The Gibbs free energy is  $G = H - T \cdot S$

|                          |     |                  |                 |
|--------------------------|-----|------------------|-----------------|
| Total enthalpy           | ... | -350.41296491 Eh |                 |
| Total entropy correction | ... | -0.04707257 Eh   | -29.54 kcal/mol |

-----



Final Gibbs free energy ... -350.46003747 E

# HEPTANAL C<sub>7</sub>H<sub>14</sub>O

CARTESIAN COORDINATES (ANGSTROEM)

## INPUT GEOMETRY OPTIMIZATION CYCLE

|   |           |           |           |
|---|-----------|-----------|-----------|
| O | 3.386700  | 1.080600  | -0.023500 |
| C | -0.535400 | -0.654400 | 0.008600  |
| C | -1.703400 | 0.333900  | 0.018200  |
| C | 0.810400  | 0.076500  | 0.033700  |
| C | -3.047000 | -0.392700 | -0.037700 |
| C | 1.994200  | -0.885000 | -0.005600 |
| C | -4.211000 | 0.584500  | 0.004900  |
| C | 3.305300  | -0.143400 | 0.001500  |
| H | -0.607200 | -1.321000 | 0.876500  |
| H | -0.592800 | -1.282700 | -0.888500 |
| H | -1.619000 | 1.013400  | -0.838700 |
| H | -1.654400 | 0.949400  | 0.924700  |
| H | 0.870300  | 0.698500  | 0.935900  |
| H | 0.865400  | 0.761200  | -0.822400 |
| H | -3.110000 | -0.989200 | -0.955300 |
| H | -3.130500 | -1.086700 | 0.806900  |
| H | 1.963200  | -1.502300 | -0.909400 |
| H | 1.979100  | -1.547100 | 0.866300  |
| H | -5.161600 | 0.043700  | -0.037100 |
| H | -4.174900 | 1.274600  | -0.844100 |
| H | -4.195600 | 1.173100  | 0.927600  |
| H | 4.209900  | -0.774600 | 0.018800  |

## FINAL GEOMETRY OPTIMIZATION CYCLE

|   |           |           |           |
|---|-----------|-----------|-----------|
| O | 3.558228  | 1.013463  | 0.038173  |
| C | -0.523375 | -0.614499 | -0.011984 |
| C | -1.725970 | 0.332077  | 0.012519  |
| C | 0.821405  | 0.116839  | 0.018002  |
| C | -3.074417 | -0.393220 | -0.022512 |
| C | 2.011186  | -0.838326 | -0.004043 |
| C | -4.270323 | 0.561279  | 0.009398  |
| C | 3.365729  | -0.177729 | 0.018169  |
| H | -0.585635 | -1.300364 | 0.843424  |
| H | -0.577160 | -1.244455 | -0.909906 |
| H | -1.663289 | 1.020647  | -0.840228 |
| H | -1.675337 | 0.959219  | 0.912170  |
| H | 0.883182  | 0.746990  | 0.911512  |
| H | 0.893126  | 0.801023  | -0.833871 |
| H | -3.125807 | -1.015043 | -0.924961 |
| H | -3.133938 | -1.084977 | 0.826956  |
| H | 1.989749  | -1.486083 | -0.893390 |
| H | 1.982830  | -1.536966 | 0.845380  |
| H | -5.218713 | 0.017360  | -0.019159 |
| H | -4.252733 | 1.244314  | -0.846095 |
| H | -4.263889 | 1.171793  | 0.918154  |
| H | 4.226850  | -0.883043 | 0.013592  |

## VIBRATIONAL FREQUENCIES

Scaling factor for frequencies = 1.00000000 (already applied!)

|     |        |                    |
|-----|--------|--------------------|
| 0:  | 0.00   | cm** <sup>-1</sup> |
| 1:  | 0.00   | cm** <sup>-1</sup> |
| 2:  | 0.00   | cm** <sup>-1</sup> |
| 3:  | 0.00   | cm** <sup>-1</sup> |
| 4:  | 0.00   | cm** <sup>-1</sup> |
| 5:  | 0.00   | cm** <sup>-1</sup> |
| 6:  | 49.17  | cm** <sup>-1</sup> |
| 7:  | 65.35  | cm** <sup>-1</sup> |
| 8:  | 84.02  | cm** <sup>-1</sup> |
| 9:  | 121.04 | cm** <sup>-1</sup> |
| 10: | 137.73 | cm** <sup>-1</sup> |

11: 179.34 cm\*\*<sup>-1</sup>  
 12: 191.27 cm\*\*<sup>-1</sup>  
 13: 244.00 cm\*\*<sup>-1</sup>  
 14: 274.03 cm\*\*<sup>-1</sup>  
 15: 382.05 cm\*\*<sup>-1</sup>  
 16: 454.64 cm\*\*<sup>-1</sup>  
 17: 667.30 cm\*\*<sup>-1</sup>  
 18: 703.64 cm\*\*<sup>-1</sup>  
 19: 733.35 cm\*\*<sup>-1</sup>  
 20: 761.15 cm\*\*<sup>-1</sup>  
 21: 840.65 cm\*\*<sup>-1</sup>  
 22: 881.96 cm\*\*<sup>-1</sup>  
 23: 912.42 cm\*\*<sup>-1</sup>  
 24: 933.97 cm\*\*<sup>-1</sup>  
 25: 1013.33 cm\*\*<sup>-1</sup>  
 26: 1016.62 cm\*\*<sup>-1</sup>  
 27: 1052.78 cm\*\*<sup>-1</sup>  
 28: 1063.39 cm\*\*<sup>-1</sup>  
 29: 1072.90 cm\*\*<sup>-1</sup>  
 30: 1138.59 cm\*\*<sup>-1</sup>  
 31: 1160.05 cm\*\*<sup>-1</sup>  
 32: 1220.32 cm\*\*<sup>-1</sup>  
 33: 1254.67 cm\*\*<sup>-1</sup>  
 34: 1273.91 cm\*\*<sup>-1</sup>  
 35: 1314.40 cm\*\*<sup>-1</sup>  
 36: 1316.62 cm\*\*<sup>-1</sup>  
 37: 1332.17 cm\*\*<sup>-1</sup>  
 38: 1336.25 cm\*\*<sup>-1</sup>  
 39: 1368.69 cm\*\*<sup>-1</sup>  
 40: 1398.87 cm\*\*<sup>-1</sup>  
 41: 1403.35 cm\*\*<sup>-1</sup>  
 42: 1413.28 cm\*\*<sup>-1</sup>  
 43: 1413.78 cm\*\*<sup>-1</sup>  
 44: 1447.39 cm\*\*<sup>-1</sup>  
 45: 1485.42 cm\*\*<sup>-1</sup>  
 46: 1486.05 cm\*\*<sup>-1</sup>  
 47: 1493.95 cm\*\*<sup>-1</sup>  
 48: 1499.03 cm\*\*<sup>-1</sup>  
 49: 1503.90 cm\*\*<sup>-1</sup>  
 50: 1512.66 cm\*\*<sup>-1</sup>  
 51: 1800.10 cm\*\*<sup>-1</sup>  
 52: 2859.45 cm\*\*<sup>-1</sup>  
 53: 2986.87 cm\*\*<sup>-1</sup>  
 54: 2990.40 cm\*\*<sup>-1</sup>  
 55: 2994.28 cm\*\*<sup>-1</sup>  
 56: 3004.88 cm\*\*<sup>-1</sup>  
 57: 3006.01 cm\*\*<sup>-1</sup>  
 58: 3007.14 cm\*\*<sup>-1</sup>  
 59: 3015.82 cm\*\*<sup>-1</sup>  
 60: 3019.63 cm\*\*<sup>-1</sup>  
 61: 3030.31 cm\*\*<sup>-1</sup>  
 62: 3041.49 cm\*\*<sup>-1</sup>  
 63: 3067.00 cm\*\*<sup>-1</sup>  
 64: 3075.87 cm\*\*<sup>-1</sup>  
 65: 3081.02 cm\*\*<sup>-1</sup>

GIBBS FREE ENERGY

The Gibbs free energy is  $G = H - T \cdot S$

|                          |     |                  |                 |
|--------------------------|-----|------------------|-----------------|
| Total enthalpy           | ... | -350.08692491 Eh |                 |
| Total entropy correction | ... | -0.04646215 Eh   | -29.16 kcal/mol |
| -----                    |     |                  |                 |
| Final Gibbs free energy  | ... | -350.13338706    |                 |

**PROTONATED HEPTANAL C<sub>7</sub>H<sub>14</sub>O<sup>+</sup>**  
CARTESIAN COORDINATES (ANGSTROEM)

INPUT GEOMETRY OPTIMIZATION CYCLE

|   |           |           |           |
|---|-----------|-----------|-----------|
| O | 3.557980  | 1.013590  | 0.041210  |
| C | -0.523470 | -0.614590 | -0.012640 |
| C | -1.725960 | 0.332100  | 0.012870  |
| C | 0.821400  | 0.116640  | 0.017520  |
| C | -3.074460 | -0.393200 | -0.021740 |
| C | 2.011270  | -0.838330 | -0.004210 |
| C | -4.270380 | 0.561370  | 0.009120  |
| C | 3.365790  | -0.177550 | 0.018520  |
| H | -0.585500 | -1.301170 | 0.842210  |
| H | -0.577490 | -1.243750 | -0.911090 |
| H | -1.663740 | 1.020960  | -0.839670 |
| H | -1.674820 | 0.958910  | 0.912710  |
| H | 0.883050  | 0.747060  | 0.910830  |
| H | 0.893250  | 0.800650  | -0.834510 |
| H | -3.125680 | -1.015870 | -0.923600 |
| H | -3.134100 | -1.084180 | 0.828350  |
| H | 1.990310  | -1.486560 | -0.893210 |
| H | 1.982960  | -1.536730 | 0.845480  |
| H | -5.218810 | 0.017490  | -0.018980 |
| H | -4.252710 | 1.243540  | -0.847050 |
| H | -4.264070 | 1.172810  | 0.917250  |
| H | 4.226890  | -0.882890 | 0.011960  |
| H | 3.374950  | 2.132280  | 0.087140  |

FINAL GEOMETRY OPTIMIZATION CYCLE

|   |           |           |           |
|---|-----------|-----------|-----------|
| O | 3.591834  | 1.051215  | 0.055955  |
| C | -0.497288 | -0.587033 | -0.013467 |
| C | -1.700261 | 0.359065  | 0.012944  |
| C | 0.843309  | 0.164196  | 0.018148  |
| C | -3.041749 | -0.381801 | -0.017854 |
| C | 2.037579  | -0.791895 | -0.004482 |
| C | -4.241021 | 0.568061  | 0.009085  |
| C | 3.363180  | -0.192386 | 0.021294  |
| H | -0.544527 | -1.269540 | 0.843256  |
| H | -0.536748 | -1.210535 | -0.914395 |
| H | -1.645006 | 1.043681  | -0.842987 |
| H | -1.652356 | 0.984635  | 0.913348  |
| H | 0.878001  | 0.781307  | 0.926059  |
| H | 0.888423  | 0.837750  | -0.848199 |
| H | -3.087449 | -1.007049 | -0.917327 |
| H | -3.094673 | -1.066916 | 0.836451  |
| H | 2.037101  | -1.461407 | -0.885073 |
| H | 2.025378  | -1.517367 | 0.830036  |
| H | -5.181749 | 0.013762  | -0.015159 |
| H | -4.231754 | 1.243191  | -0.851984 |
| H | -4.240977 | 1.182010  | 0.914796  |
| H | 4.273818  | -0.793648 | 0.011215  |
| H | 2.773593  | 1.593284  | 0.066811  |

VIBRATIONAL FREQUENCIES

Scaling factor for frequencies = 1.00000000 (already applied!)

|    |        |                    |
|----|--------|--------------------|
| 0: | 0.00   | cm** <sup>-1</sup> |
| 1: | 0.00   | cm** <sup>-1</sup> |
| 2: | 0.00   | cm** <sup>-1</sup> |
| 3: | 0.00   | cm** <sup>-1</sup> |
| 4: | 0.00   | cm** <sup>-1</sup> |
| 5: | 0.00   | cm** <sup>-1</sup> |
| 6: | 45.22  | cm** <sup>-1</sup> |
| 7: | 63.87  | cm** <sup>-1</sup> |
| 8: | 81.73  | cm** <sup>-1</sup> |
| 9: | 115.16 | cm** <sup>-1</sup> |

10: 135.48 cm\*\*-1  
 11: 180.98 cm\*\*-1  
 12: 187.27 cm\*\*-1  
 13: 243.95 cm\*\*-1  
 14: 271.27 cm\*\*-1  
 15: 375.90 cm\*\*-1  
 16: 451.51 cm\*\*-1  
 17: 560.70 cm\*\*-1  
 18: 653.39 cm\*\*-1  
 19: 737.37 cm\*\*-1  
 20: 757.96 cm\*\*-1  
 21: 809.43 cm\*\*-1  
 22: 892.83 cm\*\*-1  
 23: 895.10 cm\*\*-1  
 24: 930.22 cm\*\*-1  
 25: 989.80 cm\*\*-1  
 26: 1008.77 cm\*\*-1  
 27: 1036.51 cm\*\*-1  
 28: 1044.13 cm\*\*-1  
 29: 1051.04 cm\*\*-1  
 30: 1064.67 cm\*\*-1  
 31: 1133.11 cm\*\*-1  
 32: 1156.76 cm\*\*-1  
 33: 1218.41 cm\*\*-1  
 34: 1227.14 cm\*\*-1  
 35: 1264.70 cm\*\*-1  
 36: 1270.66 cm\*\*-1  
 37: 1312.81 cm\*\*-1  
 38: 1323.83 cm\*\*-1  
 39: 1338.23 cm\*\*-1  
 40: 1341.02 cm\*\*-1  
 41: 1344.10 cm\*\*-1  
 42: 1376.34 cm\*\*-1  
 43: 1396.84 cm\*\*-1  
 44: 1402.17 cm\*\*-1  
 45: 1420.92 cm\*\*-1  
 46: 1455.95 cm\*\*-1  
 47: 1486.19 cm\*\*-1  
 48: 1487.35 cm\*\*-1  
 49: 1494.49 cm\*\*-1  
 50: 1501.31 cm\*\*-1  
 51: 1503.21 cm\*\*-1  
 52: 1512.72 cm\*\*-1  
 53: 1604.94 cm\*\*-1  
 54: 2958.87 cm\*\*-1  
 55: 2962.13 cm\*\*-1  
 56: 2990.07 cm\*\*-1  
 57: 2998.10 cm\*\*-1  
 58: 3009.80 cm\*\*-1  
 59: 3017.29 cm\*\*-1  
 60: 3020.24 cm\*\*-1  
 61: 3025.24 cm\*\*-1  
 62: 3026.74 cm\*\*-1  
 63: 3043.92 cm\*\*-1  
 64: 3062.19 cm\*\*-1  
 65: 3085.70 cm\*\*-1  
 66: 3099.84 cm\*\*-1  
 67: 3148.46 cm\*\*-1  
 68: 3577.35 cm\*\*-1

GIBBS FREE ENERGY

The Gibbs free energy is  $G = H - T \cdot S$

|                          |     |                  |                 |
|--------------------------|-----|------------------|-----------------|
| Total enthalpy           | ... | -350.38807281 Eh |                 |
| Total entropy correction | ... | -0.04681745 Eh   | -29.38 kcal/mol |

-----

Final Gibbs free energy ... -350.43489026

**2,3-HEPTANEDIONE C<sub>7</sub>H<sub>12</sub>O<sub>2</sub>**  
CARTESIAN COORDINATES (ANGSTROM)

INPUT GEOMETRY OPTIMIZATION CYCLE

|   |           |           |           |
|---|-----------|-----------|-----------|
| C | -5.083490 | 2.594280  | -0.079010 |
| C | -4.809110 | 1.177990  | 0.328010  |
| H | -6.133200 | 2.831280  | 0.115710  |
| H | -4.898670 | 2.718590  | -1.148690 |
| H | -4.450920 | 3.275180  | 0.494860  |
| C | -3.523950 | 0.560940  | -0.199550 |
| C | -2.266980 | 1.372410  | 0.013250  |
| C | -1.010320 | 0.510080  | -0.076100 |
| H | -2.316440 | 1.837940  | 1.003850  |
| H | -2.241640 | 2.163660  | -0.743760 |
| C | 0.253510  | 1.352660  | 0.086490  |
| H | -0.980820 | -0.011170 | -1.040500 |
| H | -1.044470 | -0.265490 | 0.698840  |
| C | 1.506530  | 0.493760  | 0.039290  |
| H | 0.224140  | 1.893090  | 1.039390  |
| H | 0.302790  | 2.103670  | -0.710310 |
| H | 1.512390  | -0.235390 | 0.855450  |
| H | 2.399290  | 1.119070  | 0.136970  |
| H | 1.575120  | -0.050390 | -0.907750 |
| O | -5.525690 | 0.538820  | 1.085740  |
| O | -3.574520 | -0.501660 | -0.803590 |

FINAL GEOMETRY OPTIMIZATION CYCLE

|   |           |           |           |
|---|-----------|-----------|-----------|
| C | -5.871950 | 1.915822  | -0.421203 |
| C | -4.566358 | 2.090598  | 0.305418  |
| H | -6.657465 | 2.458372  | 0.102572  |
| H | -6.122220 | 0.853947  | -0.494939 |
| H | -5.778654 | 2.278468  | -1.449010 |
| C | -3.337785 | 1.352451  | -0.297336 |
| C | -2.021658 | 1.549686  | 0.409605  |
| C | -0.863813 | 0.769534  | -0.205721 |
| H | -2.168304 | 1.293915  | 1.466455  |
| H | -1.817023 | 2.628452  | 0.423635  |
| C | 0.460345  | 1.007349  | 0.525916  |
| H | -0.759083 | 1.046009  | -1.260296 |
| H | -1.102811 | -0.299520 | -0.201165 |
| C | 1.624844  | 0.226186  | -0.087652 |
| H | 0.348653  | 0.730228  | 1.581459  |
| H | 0.692902  | 2.079450  | 0.516215  |
| H | 1.434266  | -0.851378 | -0.060287 |
| H | 2.558504  | 0.413052  | 0.449956  |
| H | 1.780174  | 0.507519  | -1.134013 |
| O | -4.429225 | 2.758122  | 1.305610  |
| O | -3.489789 | 0.671059  | -1.286626 |

VIBRATIONAL FREQUENCIES

Scaling factor for frequencies = 1.00000000 (already applied!)

|     |        |                    |
|-----|--------|--------------------|
| 0:  | 0.00   | cm** <sup>-1</sup> |
| 1:  | 0.00   | cm** <sup>-1</sup> |
| 2:  | 0.00   | cm** <sup>-1</sup> |
| 3:  | 0.00   | cm** <sup>-1</sup> |
| 4:  | 0.00   | cm** <sup>-1</sup> |
| 5:  | 0.00   | cm** <sup>-1</sup> |
| 6:  | 30.91  | cm** <sup>-1</sup> |
| 7:  | 42.05  | cm** <sup>-1</sup> |
| 8:  | 78.59  | cm** <sup>-1</sup> |
| 9:  | 96.57  | cm** <sup>-1</sup> |
| 10: | 106.72 | cm** <sup>-1</sup> |
| 11: | 125.67 | cm** <sup>-1</sup> |
| 12: | 220.54 | cm** <sup>-1</sup> |
| 13: | 242.05 | cm** <sup>-1</sup> |
| 14: | 284.18 | cm** <sup>-1</sup> |

15: 326.92 cm\*\*-1  
 16: 351.33 cm\*\*-1  
 17: 431.25 cm\*\*-1  
 18: 532.48 cm\*\*-1  
 19: 590.41 cm\*\*-1  
 20: 594.23 cm\*\*-1  
 21: 731.92 cm\*\*-1  
 22: 781.03 cm\*\*-1  
 23: 793.03 cm\*\*-1  
 24: 910.32 cm\*\*-1  
 25: 919.67 cm\*\*-1  
 26: 924.07 cm\*\*-1  
 27: 1009.27 cm\*\*-1  
 28: 1024.97 cm\*\*-1  
 29: 1062.41 cm\*\*-1  
 30: 1071.90 cm\*\*-1  
 31: 1115.55 cm\*\*-1  
 32: 1134.44 cm\*\*-1  
 33: 1227.63 cm\*\*-1  
 34: 1232.31 cm\*\*-1  
 35: 1299.79 cm\*\*-1  
 36: 1305.05 cm\*\*-1  
 37: 1330.93 cm\*\*-1  
 38: 1375.81 cm\*\*-1  
 39: 1389.58 cm\*\*-1  
 40: 1406.73 cm\*\*-1  
 41: 1415.27 cm\*\*-1  
 42: 1438.98 cm\*\*-1  
 43: 1456.49 cm\*\*-1  
 44: 1458.30 cm\*\*-1  
 45: 1487.36 cm\*\*-1  
 46: 1495.76 cm\*\*-1  
 47: 1499.12 cm\*\*-1  
 48: 1510.20 cm\*\*-1  
 49: 1777.02 cm\*\*-1  
 50: 1782.45 cm\*\*-1  
 51: 3001.81 cm\*\*-1  
 52: 3014.83 cm\*\*-1  
 53: 3017.72 cm\*\*-1  
 54: 3023.16 cm\*\*-1  
 55: 3027.75 cm\*\*-1  
 56: 3035.75 cm\*\*-1  
 57: 3039.86 cm\*\*-1  
 58: 3063.73 cm\*\*-1  
 59: 3079.38 cm\*\*-1  
 60: 3083.93 cm\*\*-1  
 61: 3095.17 cm\*\*-1  
 62: 3146.47 cm\*\*-1

GIBBS FREE ENERGY

The Gibbs free energy is  $G = H - T*S$

|                          |     |                  |                 |
|--------------------------|-----|------------------|-----------------|
| Total enthalpy           | ... | -424.12343719 Eh |                 |
| Total entropy correction | ... | -0.04864324 Eh   | -30.52 kcal/mol |
| -----                    |     |                  |                 |
| Final Gibbs free energy  | ... | -424.17208043    |                 |



**PROTONATED 2,3-HEPTANEDIONE C<sub>7</sub>H<sub>12</sub>O<sub>2</sub><sup>+</sup>**  
CARTESIAN COORDINATES (ANGSTROEM)

INPUT GEOMETRY OPTIMIZATION CYCLE

|   |           |           |           |
|---|-----------|-----------|-----------|
| C | -5.872320 | 1.914130  | -0.419470 |
| C | -4.565910 | 2.091980  | 0.304370  |
| H | -6.657570 | 2.457630  | 0.103680  |
| H | -6.121590 | 0.851790  | -0.489410 |
| H | -5.780620 | 2.273470  | -1.448560 |
| C | -3.336770 | 1.355890  | -0.300090 |
| C | -2.021590 | 1.549790  | 0.409070  |
| C | -0.863560 | 0.770480  | -0.206960 |
| H | -2.170130 | 1.290220  | 1.464670  |
| H | -1.816290 | 2.628370  | 0.427290  |
| C | 0.460140  | 1.007740  | 0.525450  |
| H | -0.758720 | 1.047730  | -1.261320 |
| H | -1.102690 | -0.298550 | -0.203050 |
| C | 1.624460  | 0.225090  | -0.086420 |
| H | 0.347390  | 0.731480  | 1.581130  |
| H | 0.693650  | 2.079630  | 0.515320  |
| H | 1.433490  | -0.852360 | -0.057220 |
| H | 2.558070  | 0.412490  | 0.451100  |
| H | 1.780200  | 0.504450  | -1.133250 |
| O | -4.428200 | 2.759960  | 1.304320  |
| O | -3.487890 | 0.677910  | -1.292060 |
| H | -6.279760 | 4.274290  | 0.952310  |

FINAL GEOMETRY OPTIMIZATION CYCLE

|   |           |           |           |
|---|-----------|-----------|-----------|
| C | -5.901595 | 1.696421  | -0.136427 |
| C | -4.581296 | 2.308235  | 0.008617  |
| H | -6.725011 | 2.357813  | 0.136781  |
| H | -5.928775 | 0.784777  | 0.478922  |
| H | -5.999652 | 1.343115  | -1.170707 |
| C | -3.310231 | 1.590360  | -0.498404 |
| C | -2.084269 | 1.606323  | 0.348919  |
| C | -0.891891 | 0.883186  | -0.282411 |
| H | -2.352164 | 1.165316  | 1.322551  |
| H | -1.848389 | 2.656155  | 0.575740  |
| C | 0.342661  | 0.915156  | 0.625897  |
| H | -0.662040 | 1.348419  | -1.245779 |
| H | -1.169735 | -0.152972 | -0.500047 |
| C | 1.543181  | 0.205031  | -0.003277 |
| H | 0.099770  | 0.447443  | 1.587544  |
| H | 0.604754  | 1.956980  | 0.845761  |
| H | 1.319378  | -0.845770 | -0.208579 |
| H | 2.407761  | 0.236931  | 0.663039  |
| H | 1.832073  | 0.676872  | -0.946754 |
| O | -4.388432 | 3.486471  | 0.450947  |
| O | -3.469256 | 1.108814  | -1.590349 |
| H | -5.203051 | 3.978536  | 0.678916  |

VIBRATIONAL FREQUENCIES

Scaling factor for frequencies = 1.00000000 (already applied!)

|     |        |                    |
|-----|--------|--------------------|
| 0:  | 0.00   | cm** <sup>-1</sup> |
| 1:  | 0.00   | cm** <sup>-1</sup> |
| 2:  | 0.00   | cm** <sup>-1</sup> |
| 3:  | 0.00   | cm** <sup>-1</sup> |
| 4:  | 0.00   | cm** <sup>-1</sup> |
| 5:  | 0.00   | cm** <sup>-1</sup> |
| 6:  | 22.21  | cm** <sup>-1</sup> |
| 7:  | 43.93  | cm** <sup>-1</sup> |
| 8:  | 75.62  | cm** <sup>-1</sup> |
| 9:  | 92.51  | cm** <sup>-1</sup> |
| 10: | 118.08 | cm** <sup>-1</sup> |
| 11: | 126.03 | cm** <sup>-1</sup> |

12: 203.87 cm\*\*<sup>-1</sup>  
 13: 239.99 cm\*\*<sup>-1</sup>  
 14: 254.85 cm\*\*<sup>-1</sup>  
 15: 293.96 cm\*\*<sup>-1</sup>  
 16: 326.32 cm\*\*<sup>-1</sup>  
 17: 416.66 cm\*\*<sup>-1</sup>  
 18: 546.14 cm\*\*<sup>-1</sup>  
 19: 559.95 cm\*\*<sup>-1</sup>  
 20: 578.82 cm\*\*<sup>-1</sup>  
 21: 727.01 cm\*\*<sup>-1</sup>  
 22: 746.20 cm\*\*<sup>-1</sup>  
 23: 780.00 cm\*\*<sup>-1</sup>  
 24: 805.21 cm\*\*<sup>-1</sup>  
 25: 915.63 cm\*\*<sup>-1</sup>  
 26: 924.41 cm\*\*<sup>-1</sup>  
 27: 937.47 cm\*\*<sup>-1</sup>  
 28: 993.57 cm\*\*<sup>-1</sup>  
 29: 1025.35 cm\*\*<sup>-1</sup>  
 30: 1057.46 cm\*\*<sup>-1</sup>  
 31: 1067.95 cm\*\*<sup>-1</sup>  
 32: 1117.88 cm\*\*<sup>-1</sup>  
 33: 1123.98 cm\*\*<sup>-1</sup>  
 34: 1141.64 cm\*\*<sup>-1</sup>  
 35: 1228.15 cm\*\*<sup>-1</sup>  
 36: 1290.66 cm\*\*<sup>-1</sup>  
 37: 1305.29 cm\*\*<sup>-1</sup>  
 38: 1334.46 cm\*\*<sup>-1</sup>  
 39: 1343.64 cm\*\*<sup>-1</sup>  
 40: 1367.14 cm\*\*<sup>-1</sup>  
 41: 1397.55 cm\*\*<sup>-1</sup>  
 42: 1407.62 cm\*\*<sup>-1</sup>  
 43: 1415.10 cm\*\*<sup>-1</sup>  
 44: 1421.91 cm\*\*<sup>-1</sup>  
 45: 1430.49 cm\*\*<sup>-1</sup>  
 46: 1444.05 cm\*\*<sup>-1</sup>  
 47: 1487.56 cm\*\*<sup>-1</sup>  
 48: 1494.18 cm\*\*<sup>-1</sup>  
 49: 1500.38 cm\*\*<sup>-1</sup>  
 50: 1509.61 cm\*\*<sup>-1</sup>  
 51: 1568.61 cm\*\*<sup>-1</sup>  
 52: 1794.64 cm\*\*<sup>-1</sup>  
 53: 2980.59 cm\*\*<sup>-1</sup>  
 54: 3002.89 cm\*\*<sup>-1</sup>  
 55: 3008.09 cm\*\*<sup>-1</sup>  
 56: 3013.90 cm\*\*<sup>-1</sup>  
 57: 3028.68 cm\*\*<sup>-1</sup>  
 58: 3034.15 cm\*\*<sup>-1</sup>  
 59: 3038.35 cm\*\*<sup>-1</sup>  
 60: 3053.39 cm\*\*<sup>-1</sup>  
 61: 3077.27 cm\*\*<sup>-1</sup>  
 62: 3091.95 cm\*\*<sup>-1</sup>  
 63: 3103.44 cm\*\*<sup>-1</sup>  
 64: 3130.46 cm\*\*<sup>-1</sup>  
 65: 3618.24 cm\*\*<sup>-1</sup>

GIBBS FREE ENERGY

The Gibbs free energy is  $G = H - T \cdot S$

|                          |     |                  |                 |
|--------------------------|-----|------------------|-----------------|
| Total enthalpy           | ... | -424.41651267 Eh |                 |
| Total entropy correction | ... | -0.04929206 Eh   | -30.93 kcal/mol |
| -----                    |     |                  |                 |
| Final Gibbs free energy  | ... | -424.46580473    |                 |

**MENTHONE C<sub>10</sub>H<sub>18</sub>O**

CARTESIAN COORDINATES (ANGSTROM)

## INPUT GEOMETRY OPTIMIZATION CYCLE

|   |           |           |           |
|---|-----------|-----------|-----------|
| O | 0.014400  | -2.244100 | 0.654700  |
| C | -0.673500 | 0.056800  | 0.637600  |
| C | 0.193200  | 1.301000  | 0.847400  |
| C | 2.020100  | 0.377100  | -0.674900 |
| C | 1.138600  | 1.583300  | -0.320700 |
| C | -1.803800 | 0.284600  | -0.361200 |
| C | 1.170700  | -0.869300 | -0.931000 |
| C | 0.182000  | -1.116600 | 0.189600  |
| C | 3.082800  | 0.111800  | 0.396000  |
| C | -2.668900 | -0.967900 | -0.490600 |
| C | -2.655500 | 1.483300  | 0.053200  |
| H | -1.101100 | -0.210700 | 1.613800  |
| H | 0.803700  | 1.139000  | 1.745900  |
| H | -0.396300 | 2.193200  | 1.075600  |
| H | 2.556800  | 0.616200  | -1.602300 |
| H | 0.551300  | 1.871500  | -1.201200 |
| H | 1.769100  | 2.446600  | -0.076100 |
| H | -1.398800 | 0.496400  | -1.358600 |
| H | 1.809000  | -1.753000 | -1.043200 |
| H | 0.601300  | -0.758700 | -1.860600 |
| H | 3.683900  | 1.009300  | 0.575900  |
| H | 2.644600  | -0.199600 | 1.349000  |
| H | 3.763300  | -0.682500 | 0.070300  |
| H | -3.059100 | -1.286600 | 0.482100  |
| H | -3.526300 | -0.778800 | -1.146300 |
| H | -2.115900 | -1.803300 | -0.930700 |
| H | -2.958700 | 1.419600  | 1.103700  |
| H | -3.568500 | 1.534600  | -0.551100 |
| H | -2.132700 | 2.430900  | -0.105600 |

## FINAL GEOMETRY OPTIMIZATION CYCLE

|   |           |           |           |
|---|-----------|-----------|-----------|
| O | 0.179902  | -2.126648 | 0.932919  |
| C | -0.676028 | 0.104205  | 0.678276  |
| C | 0.250066  | 1.329419  | 0.873296  |
| C | 2.015202  | 0.353245  | -0.696850 |
| C | 1.159957  | 1.582807  | -0.335989 |
| C | -1.809716 | 0.327927  | -0.361468 |
| C | 1.104491  | -0.883458 | -0.895505 |
| C | 0.192199  | -1.090937 | 0.300327  |
| C | 3.104297  | 0.071571  | 0.346882  |
| C | -2.607176 | -0.963167 | -0.592651 |
| C | -2.751292 | 1.456927  | 0.077722  |
| H | -1.148358 | -0.148270 | 1.633473  |
| H | 0.863428  | 1.158502  | 1.763839  |
| H | -0.346389 | 2.218507  | 1.090730  |
| H | 2.513252  | 0.554122  | -1.652147 |
| H | 0.552866  | 1.866223  | -1.203204 |
| H | 1.815312  | 2.435665  | -0.130044 |
| H | -1.357204 | 0.621400  | -1.315931 |
| H | 1.689503  | -1.792134 | -1.049973 |
| H | 0.477616  | -0.728377 | -1.781867 |
| H | 3.745563  | 0.947119  | 0.484848  |
| H | 2.683195  | -0.193309 | 1.320705  |
| H | 3.736889  | -0.763093 | 0.032245  |
| H | -3.053552 | -1.315213 | 0.343093  |
| H | -3.416586 | -0.792880 | -1.308131 |
| H | -1.984374 | -1.773519 | -0.979873 |
| H | -3.189944 | 1.236919  | 1.057053  |
| H | -3.572448 | 1.568325  | -0.636217 |
| H | -2.244971 | 2.422221  | 0.145143  |

VIBRATIONAL FREQUENCIES

Scaling factor for frequencies = 1.00000000 (already applied!)

|     |         |        |
|-----|---------|--------|
| 0:  | 0.00    | cm**-1 |
| 1:  | 0.00    | cm**-1 |
| 2:  | 0.00    | cm**-1 |
| 3:  | 0.00    | cm**-1 |
| 4:  | 0.00    | cm**-1 |
| 5:  | 0.00    | cm**-1 |
| 6:  | 46.97   | cm**-1 |
| 7:  | 78.69   | cm**-1 |
| 8:  | 103.73  | cm**-1 |
| 9:  | 154.01  | cm**-1 |
| 10: | 182.88  | cm**-1 |
| 11: | 215.82  | cm**-1 |
| 12: | 223.91  | cm**-1 |
| 13: | 234.53  | cm**-1 |
| 14: | 321.88  | cm**-1 |
| 15: | 332.04  | cm**-1 |
| 16: | 366.40  | cm**-1 |
| 17: | 379.64  | cm**-1 |
| 18: | 392.93  | cm**-1 |
| 19: | 429.79  | cm**-1 |
| 20: | 448.81  | cm**-1 |
| 21: | 518.07  | cm**-1 |
| 22: | 552.42  | cm**-1 |
| 23: | 588.98  | cm**-1 |
| 24: | 702.27  | cm**-1 |
| 25: | 750.06  | cm**-1 |
| 26: | 806.79  | cm**-1 |
| 27: | 820.80  | cm**-1 |
| 28: | 866.83  | cm**-1 |
| 29: | 904.14  | cm**-1 |
| 30: | 926.41  | cm**-1 |
| 31: | 933.52  | cm**-1 |
| 32: | 959.74  | cm**-1 |
| 33: | 967.04  | cm**-1 |
| 34: | 972.81  | cm**-1 |
| 35: | 993.97  | cm**-1 |
| 36: | 1019.61 | cm**-1 |
| 37: | 1060.00 | cm**-1 |
| 38: | 1071.87 | cm**-1 |
| 39: | 1097.90 | cm**-1 |
| 40: | 1127.45 | cm**-1 |
| 41: | 1154.25 | cm**-1 |
| 42: | 1173.42 | cm**-1 |
| 43: | 1185.67 | cm**-1 |
| 44: | 1217.62 | cm**-1 |
| 45: | 1244.69 | cm**-1 |
| 46: | 1266.20 | cm**-1 |
| 47: | 1292.42 | cm**-1 |
| 48: | 1299.20 | cm**-1 |
| 49: | 1322.81 | cm**-1 |
| 50: | 1354.28 | cm**-1 |
| 51: | 1356.98 | cm**-1 |
| 52: | 1367.54 | cm**-1 |
| 53: | 1373.15 | cm**-1 |
| 54: | 1377.53 | cm**-1 |
| 55: | 1393.95 | cm**-1 |
| 56: | 1404.17 | cm**-1 |
| 57: | 1418.62 | cm**-1 |
| 58: | 1426.15 | cm**-1 |
| 59: | 1473.31 | cm**-1 |
| 60: | 1486.56 | cm**-1 |
| 61: | 1486.93 | cm**-1 |
| 62: | 1493.05 | cm**-1 |
| 63: | 1498.85 | cm**-1 |

64: 1503.26 cm\*\*<sup>-1</sup>  
 65: 1504.90 cm\*\*<sup>-1</sup>  
 66: 1508.99 cm\*\*<sup>-1</sup>  
 67: 1519.50 cm\*\*<sup>-1</sup>  
 68: 1772.94 cm\*\*<sup>-1</sup>  
 69: 3005.09 cm\*\*<sup>-1</sup>  
 70: 3012.26 cm\*\*<sup>-1</sup>  
 71: 3017.12 cm\*\*<sup>-1</sup>  
 72: 3018.06 cm\*\*<sup>-1</sup>  
 73: 3021.63 cm\*\*<sup>-1</sup>  
 74: 3022.12 cm\*\*<sup>-1</sup>  
 75: 3028.36 cm\*\*<sup>-1</sup>  
 76: 3032.01 cm\*\*<sup>-1</sup>  
 77: 3041.15 cm\*\*<sup>-1</sup>  
 78: 3053.56 cm\*\*<sup>-1</sup>  
 79: 3070.25 cm\*\*<sup>-1</sup>  
 80: 3076.09 cm\*\*<sup>-1</sup>  
 81: 3084.24 cm\*\*<sup>-1</sup>  
 82: 3084.50 cm\*\*<sup>-1</sup>  
 83: 3088.74 cm\*\*<sup>-1</sup>  
 84: 3090.01 cm\*\*<sup>-1</sup>  
 85: 3091.63 cm\*\*<sup>-1</sup>  
 86: 3095.31 cm\*\*<sup>-1</sup>

GIBBS FREE ENERGY

The Gibbs free energy is  $G = H - T \cdot S$

|                          |     |                  |                 |
|--------------------------|-----|------------------|-----------------|
| Total enthalpy           | ... | -466.73107800 Eh |                 |
| Total entropy correction | ... | -0.04933087 Eh   | -30.96 kcal/mol |
| -----                    |     |                  |                 |
| Final Gibbs free energy  | ... | -466.78040887 Eh |                 |

PROTONATED MENTHONE C<sub>10</sub>H<sub>18</sub>O<sup>+</sup>

CARTESIAN COORDINATES (ANGSTROEM)

INPUT GEOMETRY OPTIMIZATION CYCLE

|   |           |           |           |
|---|-----------|-----------|-----------|
| O | 0.369860  | -2.093630 | 0.847490  |
| C | -0.622210 | 0.068230  | 0.657380  |
| C | 0.283170  | 1.306840  | 0.896100  |
| C | 2.045990  | 0.420040  | -0.748540 |
| C | 1.159450  | 1.627690  | -0.338600 |
| C | -1.772380 | 0.306320  | -0.378840 |
| C | 1.166930  | -0.824230 | -0.995060 |
| C | 0.294040  | -1.053530 | 0.211370  |
| C | 3.137300  | 0.125090  | 0.297910  |
| C | -2.599350 | -0.977530 | -0.577230 |
| C | -2.724010 | 1.432630  | 0.061550  |
| H | -1.106490 | -0.205440 | 1.622020  |
| H | 0.949030  | 1.097910  | 1.758980  |
| H | -0.309390 | 2.194080  | 1.192070  |
| H | 2.578850  | 0.674810  | -1.691030 |
| H | 0.500350  | 1.900260  | -1.189240 |
| H | 1.801350  | 2.510070  | -0.127470 |
| H | -1.354800 | 0.588910  | -1.367050 |
| H | 1.799190  | -1.711240 | -1.218590 |
| H | 0.515980  | -0.648830 | -1.876710 |
| H | 3.773690  | 1.022890  | 0.447470  |
| H | 2.715360  | -0.179750 | 1.276680  |
| H | 3.787500  | -0.701340 | -0.060190 |
| H | -3.059650 | -1.300380 | 0.381380  |
| H | -3.407500 | -0.804870 | -1.320010 |
| H | -1.966560 | -1.802830 | -0.964920 |
| H | -3.176400 | 1.201210  | 1.049810  |
| H | -3.540640 | 1.555410  | -0.681930 |
| H | -2.202700 | 2.407950  | 0.119240  |
| H | 1.350590  | -2.336010 | 0.523550  |

FINAL GEOMETRY OPTIMIZATION CYCLE

|   |           |           |           |
|---|-----------|-----------|-----------|
| O | 0.306050  | -2.026685 | 0.947010  |
| C | -0.607606 | 0.118876  | 0.652267  |
| C | 0.305607  | 1.378388  | 0.842898  |
| C | 2.070442  | 0.442835  | -0.744128 |
| C | 1.198011  | 1.651560  | -0.369019 |
| C | -1.776899 | 0.329823  | -0.381756 |
| C | 1.142244  | -0.813373 | -0.961496 |
| C | 0.272288  | -0.971232 | 0.212947  |
| C | 3.171074  | 0.136574  | 0.275707  |
| C | -2.500081 | -0.994433 | -0.657240 |
| C | -2.754066 | 1.383509  | 0.146534  |
| H | -1.053074 | -0.165371 | 1.609124  |
| H | 0.911849  | 1.230245  | 1.739990  |
| H | -0.343955 | 2.228098  | 1.051824  |
| H | 2.536397  | 0.628289  | -1.714941 |
| H | 0.590251  | 1.948589  | -1.228814 |
| H | 1.849271  | 2.502022  | -0.149667 |
| H | -1.338384 | 0.695231  | -1.315913 |
| H | 1.731511  | -1.713482 | -1.158269 |
| H | 0.504543  | -0.617028 | -1.829849 |
| H | 3.839803  | 0.994153  | 0.374381  |
| H | 2.775377  | -0.084255 | 1.272276  |
| H | 3.778527  | -0.715882 | -0.040014 |
| H | -2.902590 | -1.424156 | 0.265153  |
| H | -3.337067 | -0.833865 | -1.339065 |
| H | -1.850374 | -1.745084 | -1.121615 |
| H | -3.176581 | 1.081064  | 1.109227  |
| H | -3.581685 | 1.495960  | -0.557706 |
| H | -2.295227 | 2.366163  | 0.264393  |
| H | 0.920895  | -2.705802 | 0.613351  |

VIBRATIONAL FREQUENCIES

Scaling factor for frequencies = 1.00000000 (already applied!)

|     |         |                    |
|-----|---------|--------------------|
| 0:  | 0.00    | cm** <sup>-1</sup> |
| 1:  | 0.00    | cm** <sup>-1</sup> |
| 2:  | 0.00    | cm** <sup>-1</sup> |
| 3:  | 0.00    | cm** <sup>-1</sup> |
| 4:  | 0.00    | cm** <sup>-1</sup> |
| 5:  | 0.00    | cm** <sup>-1</sup> |
| 6:  | 50.78   | cm** <sup>-1</sup> |
| 7:  | 71.44   | cm** <sup>-1</sup> |
| 8:  | 91.85   | cm** <sup>-1</sup> |
| 9:  | 145.45  | cm** <sup>-1</sup> |
| 10: | 179.58  | cm** <sup>-1</sup> |
| 11: | 216.89  | cm** <sup>-1</sup> |
| 12: | 233.26  | cm** <sup>-1</sup> |
| 13: | 250.12  | cm** <sup>-1</sup> |
| 14: | 306.19  | cm** <sup>-1</sup> |
| 15: | 324.43  | cm** <sup>-1</sup> |
| 16: | 361.94  | cm** <sup>-1</sup> |
| 17: | 373.15  | cm** <sup>-1</sup> |
| 18: | 389.54  | cm** <sup>-1</sup> |
| 19: | 423.76  | cm** <sup>-1</sup> |
| 20: | 446.33  | cm** <sup>-1</sup> |
| 21: | 491.42  | cm** <sup>-1</sup> |
| 22: | 537.31  | cm** <sup>-1</sup> |
| 23: | 587.48  | cm** <sup>-1</sup> |
| 24: | 705.37  | cm** <sup>-1</sup> |
| 25: | 729.30  | cm** <sup>-1</sup> |
| 26: | 766.07  | cm** <sup>-1</sup> |
| 27: | 803.32  | cm** <sup>-1</sup> |
| 28: | 835.54  | cm** <sup>-1</sup> |
| 29: | 861.42  | cm** <sup>-1</sup> |
| 30: | 891.29  | cm** <sup>-1</sup> |
| 31: | 907.47  | cm** <sup>-1</sup> |
| 32: | 932.86  | cm** <sup>-1</sup> |
| 33: | 938.84  | cm** <sup>-1</sup> |
| 34: | 957.14  | cm** <sup>-1</sup> |
| 35: | 966.25  | cm** <sup>-1</sup> |
| 36: | 991.37  | cm** <sup>-1</sup> |
| 37: | 1015.99 | cm** <sup>-1</sup> |
| 38: | 1049.13 | cm** <sup>-1</sup> |
| 39: | 1069.86 | cm** <sup>-1</sup> |
| 40: | 1097.40 | cm** <sup>-1</sup> |
| 41: | 1121.84 | cm** <sup>-1</sup> |
| 42: | 1140.40 | cm** <sup>-1</sup> |
| 43: | 1149.71 | cm** <sup>-1</sup> |
| 44: | 1179.56 | cm** <sup>-1</sup> |
| 45: | 1184.20 | cm** <sup>-1</sup> |
| 46: | 1199.52 | cm** <sup>-1</sup> |
| 47: | 1241.26 | cm** <sup>-1</sup> |
| 48: | 1256.55 | cm** <sup>-1</sup> |
| 49: | 1292.44 | cm** <sup>-1</sup> |
| 50: | 1322.17 | cm** <sup>-1</sup> |
| 51: | 1342.50 | cm** <sup>-1</sup> |
| 52: | 1347.79 | cm** <sup>-1</sup> |
| 53: | 1353.18 | cm** <sup>-1</sup> |
| 54: | 1361.57 | cm** <sup>-1</sup> |
| 55: | 1364.20 | cm** <sup>-1</sup> |
| 56: | 1395.18 | cm** <sup>-1</sup> |
| 57: | 1413.31 | cm** <sup>-1</sup> |
| 58: | 1427.76 | cm** <sup>-1</sup> |
| 59: | 1433.78 | cm** <sup>-1</sup> |
| 60: | 1458.65 | cm** <sup>-1</sup> |

61: 1474.14 cm\*\*-1  
62: 1481.76 cm\*\*-1  
63: 1485.84 cm\*\*-1  
64: 1492.12 cm\*\*-1  
65: 1495.13 cm\*\*-1  
66: 1503.90 cm\*\*-1  
67: 1505.12 cm\*\*-1  
68: 1508.05 cm\*\*-1  
69: 1517.17 cm\*\*-1  
70: 1549.20 cm\*\*-1  
71: 3015.10 cm\*\*-1  
72: 3025.28 cm\*\*-1  
73: 3030.74 cm\*\*-1  
74: 3035.23 cm\*\*-1  
75: 3035.77 cm\*\*-1  
76: 3043.93 cm\*\*-1  
77: 3059.10 cm\*\*-1  
78: 3063.48 cm\*\*-1  
79: 3071.41 cm\*\*-1  
80: 3076.45 cm\*\*-1  
81: 3082.09 cm\*\*-1  
82: 3088.41 cm\*\*-1  
83: 3089.00 cm\*\*-1  
84: 3099.36 cm\*\*-1  
85: 3106.42 cm\*\*-1  
86: 3108.40 cm\*\*-1  
87: 3109.73 cm\*\*-1  
88: 3118.68 cm\*\*-1  
89: 3668.11 cm\*\*-1

GIBBS FREE ENERGY

The Gibbs free energy is  $G = H - T \cdot S$

|                          |     |                  |                 |
|--------------------------|-----|------------------|-----------------|
| Total enthalpy           | ... | -467.05763638 Eh |                 |
| Total entropy correction | ... | -0.04967448 Eh   | -31.17 kcal/mol |
| -----                    |     |                  |                 |
| Final Gibbs free energy  | ... | -467.10731086 Eh |                 |

**H<sub>2</sub>OH<sub>3</sub>O<sup>+</sup>**



CARTESIAN COORDINATES (ANGSTROEM)

INPUT GEOMETRY OPTIMIZATION CYCLE

|   |           |           |           |
|---|-----------|-----------|-----------|
| O | -2.864750 | 0.510500  | 0.109720  |
| H | -1.895720 | 0.660550  | 0.004510  |
| H | -2.820080 | -0.184200 | 0.808040  |
| O | -4.832920 | 1.365570  | -1.160350 |
| H | -5.568650 | 1.279580  | -0.506900 |
| H | -4.001940 | 0.971290  | -0.729460 |
| H | -4.649180 | 2.314170  | -1.360990 |

FINAL GEOMETRY OPTIMIZATION CYCLE

|   |           |          |           |
|---|-----------|----------|-----------|
| O | -2.914585 | 0.354239 | 0.088100  |
| H | -2.076395 | 0.238405 | -0.384138 |
| H | -2.767565 | 0.398611 | 1.044350  |
| O | -4.688444 | 1.504409 | -1.033022 |
| H | -5.502712 | 1.012170 | -1.217173 |
| H | -3.805072 | 0.964892 | -0.434262 |
| H | -4.878468 | 2.444735 | -0.899285 |

VIBRATIONAL FREQUENCIES

Scaling factor for frequencies = 1.00000000 (already applied!)

|     |         |                    |
|-----|---------|--------------------|
| 0:  | 0.00    | cm** <sup>-1</sup> |
| 1:  | 0.00    | cm** <sup>-1</sup> |
| 2:  | 0.00    | cm** <sup>-1</sup> |
| 3:  | 0.00    | cm** <sup>-1</sup> |
| 4:  | 0.00    | cm** <sup>-1</sup> |
| 5:  | 0.00    | cm** <sup>-1</sup> |
| 6:  | 192.51  | cm** <sup>-1</sup> |
| 7:  | 261.65  | cm** <sup>-1</sup> |
| 8:  | 359.66  | cm** <sup>-1</sup> |
| 9:  | 485.86  | cm** <sup>-1</sup> |
| 10: | 502.88  | cm** <sup>-1</sup> |
| 11: | 615.15  | cm** <sup>-1</sup> |
| 12: | 951.13  | cm** <sup>-1</sup> |
| 13: | 1461.09 | cm** <sup>-1</sup> |
| 14: | 1521.28 | cm** <sup>-1</sup> |
| 15: | 1679.30 | cm** <sup>-1</sup> |
| 16: | 1765.41 | cm** <sup>-1</sup> |
| 17: | 3741.72 | cm** <sup>-1</sup> |
| 18: | 3750.65 | cm** <sup>-1</sup> |
| 19: | 3832.84 | cm** <sup>-1</sup> |
| 20: | 3834.81 | cm** <sup>-1</sup> |

GIBBS FREE ENERGY

The Gibbs free energy is  $G = H - T*S$

|                          |     |                  |                 |
|--------------------------|-----|------------------|-----------------|
| Total enthalpy           | ... | -153.11310659 Eh |                 |
| Total entropy correction | ... | -0.03058098 Eh   | -19.19 kcal/mol |
| -----                    |     |                  |                 |
| Final Gibbs free energy  | ... | -153.14368757    |                 |

**NH<sub>3</sub>H<sub>3</sub>O<sup>+</sup>**

CARTESIAN COORDINATES (ANGSTROEM)

INPUT GEOMETRY OPTIMIZATION CYCLE

|   |           |           |           |
|---|-----------|-----------|-----------|
| N | -1.138030 | 0.696680  | -0.011400 |
| H | -0.123580 | 0.676570  | 0.007040  |
| H | -1.463280 | 0.880440  | 0.932140  |
| H | -1.463310 | -0.226560 | -0.278980 |
| O | -0.606550 | 0.032530  | -0.587520 |
| H | 0.473890  | 0.312300  | -0.847630 |
| H | -0.876810 | -0.705240 | -1.253090 |
| H | 0.115910  | -0.516430 | -1.566740 |

FINAL GEOMETRY OPTIMIZATION CYCLE

|   |           |           |           |
|---|-----------|-----------|-----------|
| N | -1.811290 | 1.435998  | 1.147398  |
| H | -1.095895 | 2.100236  | 0.942305  |
| H | -1.641522 | 0.761282  | 1.873166  |
| H | -2.534265 | 1.237703  | 0.477694  |
| O | 0.344779  | -1.102234 | -2.099134 |
| H | 0.159343  | -0.555542 | -1.299326 |
| H | 0.542597  | -2.040628 | -1.908675 |
| H | 0.954494  | -0.686525 | -2.739609 |

VIBRATIONAL FREQUENCIES

Scaling factor for frequencies = 1.00000000 (already applied!)

|     |         |                    |
|-----|---------|--------------------|
| 0:  | 0.00    | cm** <sup>-1</sup> |
| 1:  | 0.00    | cm** <sup>-1</sup> |
| 2:  | 0.00    | cm** <sup>-1</sup> |
| 3:  | 0.00    | cm** <sup>-1</sup> |
| 4:  | 0.00    | cm** <sup>-1</sup> |
| 5:  | 0.00    | cm** <sup>-1</sup> |
| 6:  | 25.80   | cm** <sup>-1</sup> |
| 7:  | 282.82  | cm** <sup>-1</sup> |
| 8:  | 303.18  | cm** <sup>-1</sup> |
| 9:  | 325.16  | cm** <sup>-1</sup> |
| 10: | 337.65  | cm** <sup>-1</sup> |
| 11: | 505.54  | cm** <sup>-1</sup> |
| 12: | 1442.74 | cm** <sup>-1</sup> |
| 13: | 1521.96 | cm** <sup>-1</sup> |
| 14: | 1550.60 | cm** <sup>-1</sup> |
| 15: | 1652.76 | cm** <sup>-1</sup> |
| 16: | 1733.55 | cm** <sup>-1</sup> |
| 17: | 1757.85 | cm** <sup>-1</sup> |
| 18: | 2811.93 | cm** <sup>-1</sup> |
| 19: | 3423.90 | cm** <sup>-1</sup> |
| 20: | 3507.61 | cm** <sup>-1</sup> |
| 21: | 3509.22 | cm** <sup>-1</sup> |
| 22: | 3789.89 | cm** <sup>-1</sup> |
| 23: | 3875.78 | cm** <sup>-1</sup> |

GIBBS FREE ENERGY

The Gibbs free energy is  $G = H - T \cdot S$

|                          |     |                  |                 |
|--------------------------|-----|------------------|-----------------|
| Total enthalpy           | ... | -133.26239789 Eh |                 |
| Total entropy correction | ... | -0.03255709 Eh   | -20.43 kcal/mol |
| -----                    |     |                  |                 |
| Final Gibbs free energy  | ... | -133.29495498    |                 |

**C<sub>3</sub>H<sub>6</sub>OH<sub>3</sub>O<sup>+</sup>**

CARTESIAN COORDINATES (ANGSTROEM)

## INPUT GEOMETRY OPTIMIZATION CYCLE

|   |           |          |           |
|---|-----------|----------|-----------|
| C | 1.261780  | 5.541500 | 0.514800  |
| C | 1.766090  | 4.121620 | 0.688520  |
| H | 2.036930  | 6.250960 | 0.801700  |
| H | 0.372170  | 5.700210 | 1.133370  |
| H | 0.962970  | 5.716600 | -0.523670 |
| C | 0.818630  | 3.013320 | 0.271530  |
| H | -0.144900 | 3.121240 | 0.779680  |
| H | 1.253070  | 2.041560 | 0.502740  |
| H | 0.620160  | 3.078990 | -0.803580 |
| O | 2.867730  | 3.886420 | 1.135050  |
| O | 3.713950  | 3.588680 | 1.552520  |
| H | 4.793410  | 2.939640 | 1.565460  |
| H | 2.560080  | 2.852140 | 1.649210  |
| H | 3.286860  | 4.906250 | 1.434080  |

## FINAL GEOMETRY OPTIMIZATION CYCLE

|   |           |          |           |
|---|-----------|----------|-----------|
| C | 1.542825  | 5.285589 | 0.773542  |
| C | 1.320985  | 3.848073 | 0.489944  |
| H | 2.579010  | 5.524749 | 1.011462  |
| H | 0.915432  | 5.562181 | 1.631253  |
| H | 1.186808  | 5.886493 | -0.067761 |
| C | 0.055223  | 3.378124 | -0.108505 |
| H | -0.787819 | 3.797978 | 0.450387  |
| H | -0.003849 | 2.292586 | -0.137205 |
| H | -0.026485 | 3.790084 | -1.121986 |
| O | 2.188424  | 2.968688 | 0.758371  |
| O | 4.367552  | 3.790587 | 1.795739  |
| H | 5.202218  | 3.681091 | 1.315301  |
| H | 4.558529  | 3.651949 | 2.734198  |
| H | 3.070077  | 3.300958 | 1.176670  |

## VIBRATIONAL FREQUENCIES

Scaling factor for frequencies = 1.00000000 (already applied!)

|     |         |                    |
|-----|---------|--------------------|
| 0:  | 0.00    | cm** <sup>-1</sup> |
| 1:  | 0.00    | cm** <sup>-1</sup> |
| 2:  | 0.00    | cm** <sup>-1</sup> |
| 3:  | 0.00    | cm** <sup>-1</sup> |
| 4:  | 0.00    | cm** <sup>-1</sup> |
| 5:  | 0.00    | cm** <sup>-1</sup> |
| 6:  | 93.79   | cm** <sup>-1</sup> |
| 7:  | 103.38  | cm** <sup>-1</sup> |
| 8:  | 117.90  | cm** <sup>-1</sup> |
| 9:  | 126.38  | cm** <sup>-1</sup> |
| 10: | 158.52  | cm** <sup>-1</sup> |
| 11: | 278.93  | cm** <sup>-1</sup> |
| 12: | 391.87  | cm** <sup>-1</sup> |
| 13: | 400.59  | cm** <sup>-1</sup> |
| 14: | 450.13  | cm** <sup>-1</sup> |
| 15: | 499.66  | cm** <sup>-1</sup> |
| 16: | 556.88  | cm** <sup>-1</sup> |
| 17: | 816.24  | cm** <sup>-1</sup> |
| 18: | 880.80  | cm** <sup>-1</sup> |
| 19: | 946.00  | cm** <sup>-1</sup> |
| 20: | 1083.22 | cm** <sup>-1</sup> |
| 21: | 1108.12 | cm** <sup>-1</sup> |
| 22: | 1250.29 | cm** <sup>-1</sup> |
| 23: | 1285.56 | cm** <sup>-1</sup> |
| 24: | 1380.38 | cm** <sup>-1</sup> |
| 25: | 1384.97 | cm** <sup>-1</sup> |
| 26: | 1426.57 | cm** <sup>-1</sup> |
| 27: | 1443.97 | cm** <sup>-1</sup> |

28: 1458.20 cm\*\*<sup>-1</sup>  
29: 1473.48 cm\*\*<sup>-1</sup>  
30: 1494.04 cm\*\*<sup>-1</sup>  
31: 1633.40 cm\*\*<sup>-1</sup>  
32: 1649.61 cm\*\*<sup>-1</sup>  
33: 2668.44 cm\*\*<sup>-1</sup>  
34: 3010.31 cm\*\*<sup>-1</sup>  
35: 3020.67 cm\*\*<sup>-1</sup>  
36: 3082.97 cm\*\*<sup>-1</sup>  
37: 3091.25 cm\*\*<sup>-1</sup>  
38: 3152.15 cm\*\*<sup>-1</sup>  
39: 3157.56 cm\*\*<sup>-1</sup>  
40: 3777.50 cm\*\*<sup>-1</sup>  
41: 3863.13 cm\*\*<sup>-1</sup>

#### GIBBS FREE ENERGY

The Gibbs free energy is  $G = H - T*S$

|                          |     |                  |                 |
|--------------------------|-----|------------------|-----------------|
| Total enthalpy           | ... | -269.76237118 Eh |                 |
| Total entropy correction | ... | -0.04109214 Eh   | -25.79 kcal/mol |
| -----                    |     |                  |                 |
| Final Gibbs free energy  | ... | -269.80346332    |                 |

**C<sub>3</sub>H<sub>8</sub>OH<sub>3</sub>O<sup>+</sup>**

CARTESIAN COORDINATES (ANGSTROM)

## INPUT GEOMETRY OPTIMIZATION CYCLE

|   |           |          |           |
|---|-----------|----------|-----------|
| C | -6.627230 | 1.426510 | -0.445090 |
| C | -5.721920 | 1.794960 | 0.722360  |
| H | -6.266740 | 1.864730 | -1.380390 |
| H | -7.640720 | 1.801210 | -0.271030 |
| H | -6.683970 | 0.340560 | -0.572040 |
| C | -4.337290 | 1.174080 | 0.597760  |
| H | -6.186130 | 1.457790 | 1.655390  |
| H | -5.637020 | 2.886900 | 0.764810  |
| O | -3.656610 | 1.711810 | -0.551880 |
| H | -4.401350 | 0.088750 | 0.473310  |
| H | -3.733210 | 1.380840 | 1.487590  |
| H | -3.236380 | 2.532100 | -0.197580 |
| O | -3.952500 | 0.939280 | -2.900960 |
| H | -3.028680 | 0.824680 | -3.232860 |
| H | -4.412570 | 0.068990 | -2.829100 |
| H | -3.898290 | 1.335460 | -1.972260 |

## FINAL GEOMETRY OPTIMIZATION CYCLE

|   |           |          |           |
|---|-----------|----------|-----------|
| C | -6.553320 | 1.344861 | -0.570709 |
| C | -5.718844 | 1.771024 | 0.636907  |
| H | -6.183421 | 1.785928 | -1.500412 |
| H | -7.583846 | 1.684538 | -0.460505 |
| H | -6.582959 | 0.254510 | -0.669575 |
| C | -4.324950 | 1.193738 | 0.686136  |
| H | -6.190200 | 1.417318 | 1.562471  |
| H | -5.679471 | 2.860824 | 0.730895  |
| O | -3.447307 | 1.642290 | -0.468959 |
| H | -4.287219 | 0.111990 | 0.582472  |
| H | -3.753876 | 1.493227 | 1.562397  |
| H | -3.169123 | 2.566766 | -0.464103 |
| O | -4.019731 | 0.997463 | -2.698071 |
| H | -3.369023 | 0.589689 | -3.314754 |
| H | -4.887644 | 0.580870 | -2.913513 |
| H | -3.669676 | 1.333615 | -1.352647 |

## VIBRATIONAL FREQUENCIES

Scaling factor for frequencies = 1.00000000 (already applied!)

|     |         |                    |
|-----|---------|--------------------|
| 0:  | 0.00    | cm** <sup>-1</sup> |
| 1:  | 0.00    | cm** <sup>-1</sup> |
| 2:  | 0.00    | cm** <sup>-1</sup> |
| 3:  | 0.00    | cm** <sup>-1</sup> |
| 4:  | 0.00    | cm** <sup>-1</sup> |
| 5:  | 0.00    | cm** <sup>-1</sup> |
| 6:  | 55.96   | cm** <sup>-1</sup> |
| 7:  | 81.92   | cm** <sup>-1</sup> |
| 8:  | 129.71  | cm** <sup>-1</sup> |
| 9:  | 164.77  | cm** <sup>-1</sup> |
| 10: | 212.58  | cm** <sup>-1</sup> |
| 11: | 231.48  | cm** <sup>-1</sup> |
| 12: | 306.55  | cm** <sup>-1</sup> |
| 13: | 358.00  | cm** <sup>-1</sup> |
| 14: | 408.20  | cm** <sup>-1</sup> |
| 15: | 433.87  | cm** <sup>-1</sup> |
| 16: | 533.70  | cm** <sup>-1</sup> |
| 17: | 741.72  | cm** <sup>-1</sup> |
| 18: | 822.65  | cm** <sup>-1</sup> |
| 19: | 872.51  | cm** <sup>-1</sup> |
| 20: | 900.30  | cm** <sup>-1</sup> |
| 21: | 998.67  | cm** <sup>-1</sup> |
| 22: | 1043.83 | cm** <sup>-1</sup> |
| 23: | 1106.82 | cm** <sup>-1</sup> |

24: 1183.16 cm\*\*<sup>-1</sup>  
 25: 1235.67 cm\*\*<sup>-1</sup>  
 26: 1297.26 cm\*\*<sup>-1</sup>  
 27: 1336.93 cm\*\*<sup>-1</sup>  
 28: 1381.29 cm\*\*<sup>-1</sup>  
 29: 1405.97 cm\*\*<sup>-1</sup>  
 30: 1428.84 cm\*\*<sup>-1</sup>  
 31: 1475.35 cm\*\*<sup>-1</sup>  
 32: 1493.82 cm\*\*<sup>-1</sup>  
 33: 1501.98 cm\*\*<sup>-1</sup>  
 34: 1508.62 cm\*\*<sup>-1</sup>  
 35: 1626.82 cm\*\*<sup>-1</sup>  
 36: 1683.35 cm\*\*<sup>-1</sup>  
 37: 2449.23 cm\*\*<sup>-1</sup>  
 38: 3021.83 cm\*\*<sup>-1</sup>  
 39: 3026.16 cm\*\*<sup>-1</sup>  
 40: 3054.03 cm\*\*<sup>-1</sup>  
 41: 3086.39 cm\*\*<sup>-1</sup>  
 42: 3104.80 cm\*\*<sup>-1</sup>  
 43: 3117.80 cm\*\*<sup>-1</sup>  
 44: 3167.19 cm\*\*<sup>-1</sup>  
 45: 3752.42 cm\*\*<sup>-1</sup>  
 46: 3790.17 cm\*\*<sup>-1</sup>  
 47: 3882.26 cm\*\*<sup>-1</sup>

#### GIBBS FREE ENERGY

The Gibbs free energy is  $G = H - T \cdot S$

|                          |     |                  |                 |
|--------------------------|-----|------------------|-----------------|
| Total enthalpy           | ... | -270.92528541 Eh |                 |
| Total entropy correction | ... | -0.04185183 Eh   | -26.26 kcal/mol |
| -----                    |     |                  |                 |
| Final Gibbs free energy  | ... | -270.96713724    |                 |

**C<sub>4</sub>H<sub>6</sub>OH<sub>3</sub>O<sup>+</sup>**

CARTESIAN COORDINATES (ANGSTROEM)

## INPUT GEOMETRY OPTIMIZATION CYCLE

|   |           |           |           |
|---|-----------|-----------|-----------|
| C | -5.888100 | 1.575870  | 0.019440  |
| C | -4.641300 | 0.813400  | 0.145310  |
| C | -3.455800 | 1.382770  | -0.109220 |
| C | -2.126190 | 0.709700  | -0.020910 |
| H | -2.216250 | -0.332710 | 0.290000  |
| H | -1.476710 | 1.231960  | 0.690560  |
| H | -1.614200 | 0.742420  | -0.989290 |
| H | -4.728750 | -0.226070 | 0.449580  |
| H | -3.447360 | 2.430630  | -0.410610 |
| O | -6.995790 | 1.126070  | 0.222900  |
| H | -5.755540 | 2.636800  | -0.287760 |
| O | -8.151920 | 0.485380  | 0.027060  |
| H | -6.818660 | 0.085020  | 0.328350  |
| H | -7.597090 | 1.866680  | -0.659220 |
| H | -9.294610 | -0.176830 | 0.296010  |

## FINAL GEOMETRY OPTIMIZATION CYCLE

|   |           |           |           |
|---|-----------|-----------|-----------|
| C | -5.652486 | 1.665956  | -0.014333 |
| C | -4.535192 | 0.882270  | 0.144901  |
| C | -3.291238 | 1.419596  | -0.140745 |
| C | -2.020909 | 0.702781  | -0.031344 |
| H | -2.130998 | -0.325324 | 0.312104  |
| H | -1.353010 | 1.249747  | 0.650856  |
| H | -1.511530 | 0.711607  | -1.006589 |
| H | -4.630611 | -0.146193 | 0.485404  |
| H | -3.246115 | 2.455306  | -0.476549 |
| O | -6.899626 | 1.210529  | 0.245946  |
| H | -5.620655 | 2.697062  | -0.345694 |
| O | -8.766326 | 0.324659  | -0.015089 |
| H | -6.960560 | 0.244060  | 0.446701  |
| H | -7.972858 | 1.344635  | -0.189373 |
| H | -9.616157 | -0.085600 | -0.073996 |

## VIBRATIONAL FREQUENCIES

Scaling factor for frequencies = 1.00000000 (already applied!)

|     |         |                    |
|-----|---------|--------------------|
| 0:  | 0.00    | cm** <sup>-1</sup> |
| 1:  | 0.00    | cm** <sup>-1</sup> |
| 2:  | 0.00    | cm** <sup>-1</sup> |
| 3:  | 0.00    | cm** <sup>-1</sup> |
| 4:  | 0.00    | cm** <sup>-1</sup> |
| 5:  | 0.00    | cm** <sup>-1</sup> |
| 6:  | 72.87   | cm** <sup>-1</sup> |
| 7:  | 111.49  | cm** <sup>-1</sup> |
| 8:  | 140.16  | cm** <sup>-1</sup> |
| 9:  | 167.84  | cm** <sup>-1</sup> |
| 10: | 196.43  | cm** <sup>-1</sup> |
| 11: | 210.52  | cm** <sup>-1</sup> |
| 12: | 309.42  | cm** <sup>-1</sup> |
| 13: | 341.39  | cm** <sup>-1</sup> |
| 14: | 403.39  | cm** <sup>-1</sup> |
| 15: | 463.08  | cm** <sup>-1</sup> |
| 16: | 469.02  | cm** <sup>-1</sup> |
| 17: | 553.06  | cm** <sup>-1</sup> |
| 18: | 823.11  | cm** <sup>-1</sup> |
| 19: | 938.74  | cm** <sup>-1</sup> |
| 20: | 982.74  | cm** <sup>-1</sup> |
| 21: | 1017.99 | cm** <sup>-1</sup> |
| 22: | 1074.38 | cm** <sup>-1</sup> |
| 23: | 1144.28 | cm** <sup>-1</sup> |
| 24: | 1224.87 | cm** <sup>-1</sup> |
| 25: | 1247.80 | cm** <sup>-1</sup> |

26: 1299.86 cm\*\*-1  
27: 1317.28 cm\*\*-1  
28: 1373.35 cm\*\*-1  
29: 1385.03 cm\*\*-1  
30: 1451.35 cm\*\*-1  
31: 1467.93 cm\*\*-1  
32: 1472.15 cm\*\*-1  
33: 1601.39 cm\*\*-1  
34: 1644.35 cm\*\*-1  
35: 1652.03 cm\*\*-1  
36: 2816.66 cm\*\*-1  
37: 3009.07 cm\*\*-1  
38: 3046.67 cm\*\*-1  
39: 3126.62 cm\*\*-1  
40: 3143.62 cm\*\*-1  
41: 3148.02 cm\*\*-1  
42: 3177.73 cm\*\*-1  
43: 3780.03 cm\*\*-1  
44: 3866.53 cm\*\*-1

#### GIBBS FREE ENERGY

The Gibbs free energy is  $G = H - T*S$

|                          |     |                  |                 |
|--------------------------|-----|------------------|-----------------|
| Total enthalpy           | ... | -307.83036003 Eh |                 |
| Total entropy correction | ... | -0.04255594 Eh   | -26.70 kcal/mol |
| -----                    |     |                  |                 |
| Final Gibbs free energy  | ... | -307.87291597    |                 |



**C<sub>7</sub>H<sub>12</sub>OH<sub>3</sub><sup>+</sup>**

CARTESIAN COORDINATES (ANGSTROEM)

## INPUT GEOMETRY OPTIMIZATION CYCLE

|   |           |           |           |
|---|-----------|-----------|-----------|
| C | -4.327620 | 0.493460  | 0.086280  |
| C | -3.023300 | -0.179870 | 0.221070  |
| C | -1.979400 | 0.274510  | -0.485180 |
| C | -0.608640 | -0.343070 | -0.444800 |
| C | 0.439750  | 0.696770  | -0.048350 |
| H | -0.379990 | -0.742120 | -1.440330 |
| H | -0.579370 | -1.187190 | 0.254890  |
| C | 1.849800  | 0.109400  | -0.072560 |
| H | 0.217770  | 1.080040  | 0.955720  |
| H | 0.391810  | 1.552130  | -0.734580 |
| C | 2.885910  | 1.153470  | 0.312170  |
| H | 2.077840  | -0.271370 | -1.074980 |
| H | 1.914380  | -0.737650 | 0.620000  |
| H | 2.862150  | 2.002010  | -0.379310 |
| H | 3.890430  | 0.720510  | 0.284620  |
| H | 2.704650  | 1.530450  | 1.323820  |
| H | -2.960040 | -1.038440 | 0.878770  |
| H | -2.089070 | 1.124220  | -1.158240 |
| O | -5.376380 | -0.065390 | 0.415100  |
| H | -4.316480 | 1.499880  | -0.367620 |
| O | -6.246210 | -0.951280 | 0.012290  |
| H | -6.040170 | -1.835450 | 0.400870  |
| H | -6.951720 | -0.492870 | 0.529240  |
| H | -5.407460 | -0.392780 | 0.085310  |

## FINAL GEOMETRY OPTIMIZATION CYCLE

|   |           |           |           |
|---|-----------|-----------|-----------|
| C | -4.254964 | 0.938718  | -0.629860 |
| C | -3.120862 | 0.127208  | -0.451194 |
| C | -1.938605 | 0.529994  | -1.003953 |
| C | -0.649416 | -0.167442 | -0.882900 |
| C | 0.354115  | 0.689358  | -0.052014 |
| H | -0.225237 | -0.292870 | -1.887719 |
| H | -0.769892 | -1.155416 | -0.433161 |
| C | 1.732374  | 0.022470  | 0.028770  |
| H | -0.050669 | 0.834989  | 0.954788  |
| H | 0.448329  | 1.681899  | -0.505723 |
| C | 2.720074  | 0.845360  | 0.858774  |
| H | 2.123906  | -0.117269 | -0.984919 |
| H | 1.626125  | -0.977908 | 0.462942  |
| H | 2.876939  | 1.836672  | 0.423796  |
| H | 3.691282  | 0.347824  | 0.908387  |
| H | 2.363846  | 0.980160  | 1.884274  |
| H | -3.201614 | -0.796938 | 0.111949  |
| H | -1.929499 | 1.470219  | -1.555777 |
| O | -5.428661 | 0.705881  | -0.187817 |
| H | -4.177840 | 1.867486  | -1.194296 |
| O | -5.670085 | -1.498828 | 1.132823  |
| H | -5.862373 | -1.486045 | 2.079334  |
| H | -6.179905 | -2.228900 | 0.758330  |
| H | -5.528727 | -0.157253 | 0.339366  |

## VIBRATIONAL FREQUENCIES

Scaling factor for frequencies = 1.00000000 (already applied!)

|    |       |                    |
|----|-------|--------------------|
| 0: | 0.00  | cm** <sup>-1</sup> |
| 1: | 0.00  | cm** <sup>-1</sup> |
| 2: | 0.00  | cm** <sup>-1</sup> |
| 3: | 0.00  | cm** <sup>-1</sup> |
| 4: | 0.00  | cm** <sup>-1</sup> |
| 5: | 0.00  | cm** <sup>-1</sup> |
| 6: | 27.97 | cm** <sup>-1</sup> |
| 7: | 57.34 | cm** <sup>-1</sup> |

|     |         |                    |
|-----|---------|--------------------|
| 8:  | 65.70   | cm** <sup>-1</sup> |
| 9:  | 80.30   | cm** <sup>-1</sup> |
| 10: | 118.02  | cm** <sup>-1</sup> |
| 11: | 150.55  | cm** <sup>-1</sup> |
| 12: | 172.21  | cm** <sup>-1</sup> |
| 13: | 184.50  | cm** <sup>-1</sup> |
| 14: | 216.20  | cm** <sup>-1</sup> |
| 15: | 241.44  | cm** <sup>-1</sup> |
| 16: | 279.50  | cm** <sup>-1</sup> |
| 17: | 302.77  | cm** <sup>-1</sup> |
| 18: | 342.36  | cm** <sup>-1</sup> |
| 19: | 395.58  | cm** <sup>-1</sup> |
| 20: | 425.06  | cm** <sup>-1</sup> |
| 21: | 477.17  | cm** <sup>-1</sup> |
| 22: | 505.56  | cm** <sup>-1</sup> |
| 23: | 572.80  | cm** <sup>-1</sup> |
| 24: | 741.51  | cm** <sup>-1</sup> |
| 25: | 805.43  | cm** <sup>-1</sup> |
| 26: | 862.55  | cm** <sup>-1</sup> |
| 27: | 908.35  | cm** <sup>-1</sup> |
| 28: | 936.87  | cm** <sup>-1</sup> |
| 29: | 970.72  | cm** <sup>-1</sup> |
| 30: | 985.52  | cm** <sup>-1</sup> |
| 31: | 1027.66 | cm** <sup>-1</sup> |
| 32: | 1041.66 | cm** <sup>-1</sup> |
| 33: | 1058.56 | cm** <sup>-1</sup> |
| 34: | 1103.61 | cm** <sup>-1</sup> |
| 35: | 1165.39 | cm** <sup>-1</sup> |
| 36: | 1218.88 | cm** <sup>-1</sup> |
| 37: | 1226.51 | cm** <sup>-1</sup> |
| 38: | 1228.35 | cm** <sup>-1</sup> |
| 39: | 1253.23 | cm** <sup>-1</sup> |
| 40: | 1288.88 | cm** <sup>-1</sup> |
| 41: | 1309.01 | cm** <sup>-1</sup> |
| 42: | 1323.48 | cm** <sup>-1</sup> |
| 43: | 1331.11 | cm** <sup>-1</sup> |
| 44: | 1343.78 | cm** <sup>-1</sup> |
| 45: | 1372.56 | cm** <sup>-1</sup> |
| 46: | 1382.05 | cm** <sup>-1</sup> |
| 47: | 1419.52 | cm** <sup>-1</sup> |
| 48: | 1469.37 | cm** <sup>-1</sup> |
| 49: | 1479.79 | cm** <sup>-1</sup> |
| 50: | 1488.29 | cm** <sup>-1</sup> |
| 51: | 1496.19 | cm** <sup>-1</sup> |
| 52: | 1498.70 | cm** <sup>-1</sup> |
| 53: | 1509.69 | cm** <sup>-1</sup> |
| 54: | 1593.19 | cm** <sup>-1</sup> |
| 55: | 1633.03 | cm** <sup>-1</sup> |
| 56: | 1649.02 | cm** <sup>-1</sup> |
| 57: | 2879.43 | cm** <sup>-1</sup> |
| 58: | 3010.41 | cm** <sup>-1</sup> |
| 59: | 3016.63 | cm** <sup>-1</sup> |
| 60: | 3025.48 | cm** <sup>-1</sup> |
| 61: | 3029.94 | cm** <sup>-1</sup> |
| 62: | 3042.50 | cm** <sup>-1</sup> |
| 63: | 3066.99 | cm** <sup>-1</sup> |
| 64: | 3089.35 | cm** <sup>-1</sup> |
| 65: | 3093.56 | cm** <sup>-1</sup> |
| 66: | 3100.22 | cm** <sup>-1</sup> |
| 67: | 3128.88 | cm** <sup>-1</sup> |
| 68: | 3151.00 | cm** <sup>-1</sup> |
| 69: | 3177.26 | cm** <sup>-1</sup> |
| 70: | 3782.36 | cm** <sup>-1</sup> |
| 71: | 3869.57 | cm** <sup>-1</sup> |

GIBBS FREE ENERGY

The Gibbs free energy is  $G = H - T \cdot S$

|                          |     |                  |                 |
|--------------------------|-----|------------------|-----------------|
| Total enthalpy           | ... | -425.64218463 Eh |                 |
| Total entropy correction | ... | -0.05205267 Eh   | -32.66 kcal/mol |

-----  
Final Gibbs free energy           ...   -425.69423730

**C<sub>7</sub>H<sub>14</sub>OH<sub>3</sub><sup>+</sup>**

CARTESIAN COORDINATES (ANGSTROEM)

INPUT GEOMETRY OPTIMIZATION CYCLE

|   |           |           |           |
|---|-----------|-----------|-----------|
| C | -5.563830 | 0.681580  | -0.081330 |
| C | -4.260150 | 1.424070  | 0.072100  |
| H | -5.650120 | 0.308930  | -1.104800 |
| H | -6.398060 | 1.357020  | 0.127360  |
| H | -5.601950 | -0.149150 | 0.627500  |
| C | -2.999610 | 0.576010  | 0.031670  |
| C | -1.721450 | 1.410870  | 0.060260  |
| H | -3.029070 | -0.022530 | -0.885710 |
| H | -3.024260 | -0.102450 | 0.891590  |
| C | -0.480920 | 0.517240  | 0.005240  |
| H | -1.697390 | 2.022320  | 0.970820  |
| H | -1.715890 | 2.106860  | -0.787780 |
| C | 0.806850  | 1.340130  | 0.008470  |
| H | -0.515250 | -0.103350 | -0.898630 |
| H | -0.483010 | -0.164640 | 0.864460  |
| C | 2.036530  | 0.445920  | -0.028800 |
| H | 0.846380  | 1.968900  | 0.905410  |
| H | 0.822840  | 2.009870  | -0.859200 |
| H | 2.069060  | -0.212550 | 0.845210  |
| H | 2.947440  | 1.052610  | -0.030780 |
| H | 2.041640  | -0.177570 | -0.928650 |
| O | -4.242420 | 2.655790  | 0.200280  |
| O | -4.386330 | 5.104660  | 0.090350  |
| H | -3.446540 | 5.344510  | 0.276930  |
| H | -4.416490 | 4.097230  | 0.014390  |
| H | -4.969960 | 5.362620  | 0.844050  |

FINAL GEOMETRY OPTIMIZATION CYCLE

|   |           |           |           |
|---|-----------|-----------|-----------|
| C | -5.330807 | 1.312654  | -0.214591 |
| C | -3.959840 | 1.805607  | 0.066394  |
| H | -5.436410 | 1.256293  | -1.307408 |
| H | -6.104442 | 1.977511  | 0.169215  |
| H | -5.461330 | 0.297703  | 0.164213  |
| C | -2.806601 | 0.883305  | 0.081826  |
| C | -1.411071 | 1.509903  | 0.068892  |
| H | -2.950087 | 0.165878  | -0.738172 |
| H | -2.954878 | 0.267849  | 0.987276  |
| C | -0.313734 | 0.440726  | 0.041860  |
| H | -1.288535 | 2.150393  | 0.946969  |
| H | -1.315838 | 2.159833  | -0.807245 |
| C | 1.095861  | 1.040754  | 0.026067  |
| H | -0.446399 | -0.196152 | -0.841921 |
| H | -0.419403 | -0.216438 | 0.914416  |
| C | 2.192229  | -0.025375 | -0.024861 |
| H | 1.230902  | 1.666593  | 0.916106  |
| H | 1.192910  | 1.709205  | -0.837729 |
| H | 2.140473  | -0.690450 | 0.842486  |
| H | 3.184376  | 0.431407  | -0.033117 |
| H | 2.103677  | -0.642223 | -0.924271 |
| O | -3.733458 | 3.032373  | 0.284670  |
| O | -5.753200 | 4.601160  | 0.353376  |
| H | -5.959541 | 5.203740  | -0.372816 |
| H | -4.550698 | 3.649018  | 0.296946  |
| H | -5.976115 | 5.063630  | 1.171829  |

VIBRATIONAL FREQUENCIES

Scaling factor for frequencies = 1.00000000 (already applied!)

|    |      |                    |
|----|------|--------------------|
| 0: | 0.00 | cm** <sup>-1</sup> |
| 1: | 0.00 | cm** <sup>-1</sup> |
| 2: | 0.00 | cm** <sup>-1</sup> |

3: 0.00 cm\*\*-1  
4: 0.00 cm\*\*-1  
5: 0.00 cm\*\*-1  
6: 41.90 cm\*\*-1  
7: 46.59 cm\*\*-1  
8: 62.47 cm\*\*-1  
9: 91.69 cm\*\*-1  
10: 108.55 cm\*\*-1  
11: 125.36 cm\*\*-1  
12: 133.72 cm\*\*-1  
13: 137.12 cm\*\*-1  
14: 157.73 cm\*\*-1  
15: 194.13 cm\*\*-1  
16: 243.81 cm\*\*-1  
17: 285.11 cm\*\*-1  
18: 308.14 cm\*\*-1  
19: 380.72 cm\*\*-1  
20: 410.20 cm\*\*-1  
21: 432.41 cm\*\*-1  
22: 468.02 cm\*\*-1  
23: 488.86 cm\*\*-1  
24: 610.97 cm\*\*-1  
25: 708.37 cm\*\*-1  
26: 743.77 cm\*\*-1  
27: 813.05 cm\*\*-1  
28: 854.55 cm\*\*-1  
29: 913.49 cm\*\*-1  
30: 934.62 cm\*\*-1  
31: 979.89 cm\*\*-1  
32: 1003.93 cm\*\*-1  
33: 1028.90 cm\*\*-1  
34: 1051.40 cm\*\*-1  
35: 1065.22 cm\*\*-1  
36: 1130.42 cm\*\*-1  
37: 1141.60 cm\*\*-1  
38: 1186.66 cm\*\*-1  
39: 1224.00 cm\*\*-1  
40: 1261.14 cm\*\*-1  
41: 1277.64 cm\*\*-1  
42: 1286.76 cm\*\*-1  
43: 1329.20 cm\*\*-1  
44: 1338.62 cm\*\*-1  
45: 1344.03 cm\*\*-1  
46: 1385.82 cm\*\*-1  
47: 1391.74 cm\*\*-1  
48: 1397.29 cm\*\*-1  
49: 1405.96 cm\*\*-1  
50: 1420.61 cm\*\*-1  
51: 1437.31 cm\*\*-1  
52: 1478.92 cm\*\*-1  
53: 1486.58 cm\*\*-1  
54: 1489.30 cm\*\*-1  
55: 1495.30 cm\*\*-1  
56: 1501.22 cm\*\*-1  
57: 1501.46 cm\*\*-1  
58: 1511.94 cm\*\*-1  
59: 1613.90 cm\*\*-1  
60: 1649.15 cm\*\*-1  
61: 2764.87 cm\*\*-1  
62: 2966.07 cm\*\*-1  
63: 2998.57 cm\*\*-1  
64: 3010.99 cm\*\*-1  
65: 3014.69 cm\*\*-1  
66: 3020.93 cm\*\*-1  
67: 3022.76 cm\*\*-1  
68: 3024.75 cm\*\*-1

69: 3035.49 cm\*\*<sup>-1</sup>  
70: 3045.54 cm\*\*<sup>-1</sup>  
71: 3078.72 cm\*\*<sup>-1</sup>  
72: 3085.66 cm\*\*<sup>-1</sup>  
73: 3095.63 cm\*\*<sup>-1</sup>  
74: 3098.54 cm\*\*<sup>-1</sup>  
75: 3149.56 cm\*\*<sup>-1</sup>  
76: 3780.91 cm\*\*<sup>-1</sup>  
77: 3867.61 cm\*\*<sup>-1</sup>

#### GIBBS FREE ENERGY

The Gibbs free energy is  $G = H - T \cdot S$

|                          |     |                  |                 |
|--------------------------|-----|------------------|-----------------|
| Total enthalpy           | ... | -426.84540251 Eh |                 |
| Total entropy correction | ... | -0.05372113 Eh   | -33.71 kcal/mol |
| -----                    |     |                  |                 |
| Final Gibbs free energy  | ... | -426.89912364    |                 |

**C<sub>7</sub>H<sub>14</sub>OH<sub>3</sub><sup>+</sup>**

CARTESIAN COORDINATES (ANGSTROEM)

## INPUT GEOMETRY OPTIMIZATION CYCLE

|   |           |           |           |
|---|-----------|-----------|-----------|
| O | 3.521720  | 0.838970  | 0.083590  |
| C | -0.554000 | -0.674530 | -0.016230 |
| C | -1.706090 | 0.330670  | 0.012800  |
| C | 0.808960  | 0.017640  | 0.013450  |
| C | -3.056020 | -0.387080 | -0.020750 |
| C | 1.937860  | -1.008260 | -0.017210 |
| C | -4.216970 | 0.593210  | 0.009960  |
| C | 3.308470  | -0.375460 | 0.009670  |
| H | -0.638310 | -1.350910 | 0.843210  |
| H | -0.630340 | -1.291070 | -0.920260 |
| H | -1.627010 | 1.008350  | -0.845900 |
| H | -1.637170 | 0.945520  | 0.918390  |
| H | 0.893040  | 0.636070  | 0.915720  |
| H | 0.900980  | 0.696280  | -0.843670 |
| H | -3.128130 | -1.000010 | -0.926870 |
| H | -3.137170 | -1.065940 | 0.836270  |
| H | 1.875820  | -1.616110 | -0.926310 |
| H | 1.869650  | -1.678070 | 0.846800  |
| H | -5.168360 | 0.052410  | -0.016210 |
| H | -4.185430 | 1.266550  | -0.852400 |
| H | -4.195680 | 1.198640  | 0.921570  |
| H | 4.151140  | -1.088980 | -0.034360 |
| O | 3.906960  | 3.252920  | 0.177930  |
| H | 4.893270  | 3.278350  | 0.130200  |
| H | 3.599880  | 3.451540  | 1.095470  |
| H | 3.632670  | 2.300520  | -0.019510 |

## FINAL GEOMETRY OPTIMIZATION CYCLE

|   |           |           |           |
|---|-----------|-----------|-----------|
| O | 3.969474  | 0.589546  | 0.232477  |
| C | -0.364479 | -0.595858 | -0.045979 |
| C | -1.492711 | 0.433729  | 0.056961  |
| C | 1.025616  | 0.039251  | 0.087692  |
| C | -2.887219 | -0.185294 | -0.084783 |
| C | 2.136131  | -1.007509 | 0.021597  |
| C | -4.009434 | 0.848830  | 0.027003  |
| C | 3.531374  | -0.577909 | 0.141555  |
| H | -0.492259 | -1.358216 | 0.731997  |
| H | -0.431231 | -1.118990 | -1.007422 |
| H | -1.357992 | 1.201086  | -0.716714 |
| H | -1.424579 | 0.951346  | 1.022971  |
| H | 1.085607  | 0.568975  | 1.046345  |
| H | 1.162561  | 0.777549  | -0.708882 |
| H | -2.955847 | -0.700405 | -1.050137 |
| H | -3.018524 | -0.955736 | 0.684175  |
| H | 2.105696  | -1.588475 | -0.918525 |
| H | 2.013228  | -1.795699 | 0.784194  |
| H | -4.989952 | 0.378613  | -0.075713 |
| H | -3.924867 | 1.611858  | -0.753013 |
| H | -3.985436 | 1.356978  | 0.995932  |
| H | 4.315930  | -1.339624 | 0.156835  |
| O | 2.758162  | 2.766376  | 0.081310  |
| H | 3.343783  | 3.517675  | -0.079868 |
| H | 1.975488  | 3.094916  | 0.539970  |
| H | 3.331220  | 1.418206  | 0.205373  |

## VIBRATIONAL FREQUENCIES

Scaling factor for frequencies = 1.00000000 (already applied!)

|    |      |        |
|----|------|--------|
| 0: | 0.00 | cm**-1 |
| 1: | 0.00 | cm**-1 |
| 2: | 0.00 | cm**-1 |
| 3: | 0.00 | cm**-1 |

4: 0.00 cm\*\*-1  
5: 0.00 cm\*\*-1  
6: 44.85 cm\*\*-1  
7: 55.64 cm\*\*-1  
8: 58.73 cm\*\*-1  
9: 83.77 cm\*\*-1  
10: 102.51 cm\*\*-1  
11: 123.86 cm\*\*-1  
12: 138.86 cm\*\*-1  
13: 149.73 cm\*\*-1  
14: 190.61 cm\*\*-1  
15: 241.11 cm\*\*-1  
16: 245.46 cm\*\*-1  
17: 269.88 cm\*\*-1  
18: 286.47 cm\*\*-1  
19: 336.61 cm\*\*-1  
20: 382.25 cm\*\*-1  
21: 447.44 cm\*\*-1  
22: 478.56 cm\*\*-1  
23: 635.85 cm\*\*-1  
24: 707.02 cm\*\*-1  
25: 738.54 cm\*\*-1  
26: 769.38 cm\*\*-1  
27: 848.65 cm\*\*-1  
28: 889.86 cm\*\*-1  
29: 921.82 cm\*\*-1  
30: 939.78 cm\*\*-1  
31: 1012.35 cm\*\*-1  
32: 1018.32 cm\*\*-1  
33: 1048.51 cm\*\*-1  
34: 1064.91 cm\*\*-1  
35: 1072.52 cm\*\*-1  
36: 1139.95 cm\*\*-1  
37: 1154.69 cm\*\*-1  
38: 1209.46 cm\*\*-1  
39: 1229.75 cm\*\*-1  
40: 1263.17 cm\*\*-1  
41: 1274.59 cm\*\*-1  
42: 1316.22 cm\*\*-1  
43: 1323.06 cm\*\*-1  
44: 1337.21 cm\*\*-1  
45: 1342.60 cm\*\*-1  
46: 1362.85 cm\*\*-1  
47: 1374.23 cm\*\*-1  
48: 1381.95 cm\*\*-1  
49: 1402.08 cm\*\*-1  
50: 1417.91 cm\*\*-1  
51: 1419.65 cm\*\*-1  
52: 1425.44 cm\*\*-1  
53: 1486.85 cm\*\*-1  
54: 1488.32 cm\*\*-1  
55: 1496.76 cm\*\*-1  
56: 1501.33 cm\*\*-1  
57: 1507.05 cm\*\*-1  
58: 1514.38 cm\*\*-1  
59: 1639.14 cm\*\*-1  
60: 1662.39 cm\*\*-1  
61: 2462.92 cm\*\*-1  
62: 2962.27 cm\*\*-1  
63: 2980.11 cm\*\*-1  
64: 2991.29 cm\*\*-1  
65: 3005.53 cm\*\*-1  
66: 3011.50 cm\*\*-1  
67: 3014.13 cm\*\*-1  
68: 3017.41 cm\*\*-1  
69: 3023.33 cm\*\*-1



70: 3037.55 cm\*\*<sup>-1</sup>  
71: 3049.59 cm\*\*<sup>-1</sup>  
72: 3069.35 cm\*\*<sup>-1</sup>  
73: 3083.32 cm\*\*<sup>-1</sup>  
74: 3097.83 cm\*\*<sup>-1</sup>  
75: 3114.61 cm\*\*<sup>-1</sup>  
76: 3785.69 cm\*\*<sup>-1</sup>  
77: 3878.31 cm\*\*<sup>-1</sup>

#### GIBBS FREE ENERGY

The Gibbs free energy is  $G = H - T*S$

|                          |     |                  |                 |
|--------------------------|-----|------------------|-----------------|
| Total enthalpy           | ... | -426.82083626 Eh |                 |
| Total entropy correction | ... | -0.05329838 Eh   | -33.45 kcal/mol |
| -----                    |     |                  |                 |
| Final Gibbs free energy  | ... | -426.87413464    |                 |

**C<sub>7</sub>H<sub>12</sub>O<sub>2</sub>H<sub>3</sub>O<sup>+</sup>**

CARTESIAN COORDINATES (ANGSTROEM)

## INPUT GEOMETRY OPTIMIZATION CYCLE

|   |           |           |           |
|---|-----------|-----------|-----------|
| C | -5.872320 | 1.914130  | -0.419470 |
| C | -4.565910 | 2.091980  | 0.304370  |
| H | -6.657570 | 2.457630  | 0.103680  |
| H | -6.121590 | 0.851790  | -0.489410 |
| H | -5.780620 | 2.273470  | -1.448560 |
| C | -3.336770 | 1.355890  | -0.300090 |
| C | -2.021590 | 1.549790  | 0.409070  |
| C | -0.863560 | 0.770480  | -0.206960 |
| H | -2.170130 | 1.290220  | 1.464670  |
| H | -1.816290 | 2.628370  | 0.427290  |
| C | 0.460140  | 1.007740  | 0.525450  |
| H | -0.758720 | 1.047730  | -1.261320 |
| H | -1.102690 | -0.298550 | -0.203050 |
| C | 1.624460  | 0.225090  | -0.086420 |
| H | 0.347390  | 0.731480  | 1.581130  |
| H | 0.693650  | 2.079630  | 0.515320  |
| H | 1.433490  | -0.852360 | -0.057220 |
| H | 2.558070  | 0.412490  | 0.451100  |
| H | 1.780200  | 0.504450  | -1.133250 |
| O | -4.428200 | 2.759960  | 1.304320  |
| O | -3.487890 | 0.677910  | -1.292060 |
| O | -3.148650 | 0.089120  | -1.942830 |
| H | -2.551350 | 0.677610  | -0.939040 |
| H | -4.379460 | 0.418700  | -1.924250 |
| H | -2.185660 | -0.734910 | -2.723560 |

## FINAL GEOMETRY OPTIMIZATION CYCLE

|   |           |           |           |
|---|-----------|-----------|-----------|
| C | -5.011801 | 2.307601  | 0.386662  |
| C | -4.574894 | 1.350918  | -0.673158 |
| H | -6.051774 | 2.581564  | 0.218261  |
| H | -4.387040 | 3.205763  | 0.390635  |
| H | -4.913103 | 1.842879  | 1.374502  |
| C | -3.091089 | 0.853159  | -0.682946 |
| C | -2.018479 | 1.563953  | 0.033031  |
| C | -0.614898 | 0.967710  | -0.068612 |
| H | -2.348259 | 1.662885  | 1.079843  |
| H | -2.045662 | 2.604846  | -0.333772 |
| C | 0.413177  | 1.797979  | 0.708753  |
| H | -0.323500 | 0.903232  | -1.121608 |
| H | -0.630978 | -0.058482 | 0.312110  |
| C | 1.821428  | 1.207087  | 0.620814  |
| H | 0.106843  | 1.864620  | 1.759572  |
| H | 0.418548  | 2.824103  | 0.322255  |
| H | 1.852953  | 0.195133  | 1.034807  |
| H | 2.534829  | 1.816498  | 1.179094  |
| H | 2.166512  | 1.157044  | -0.415963 |
| O | -5.276652 | 0.908049  | -1.548235 |
| O | -2.827792 | -0.161604 | -1.356003 |
| O | -4.474224 | -1.506448 | -2.570265 |
| H | -4.189795 | -2.197217 | -3.182092 |
| H | -3.617327 | -0.686675 | -1.897779 |
| H | -5.268595 | -1.074758 | -2.910993 |

## VIBRATIONAL FREQUENCIES

Scaling factor for frequencies = 1.00000000 (already applied!)

|    |      |                    |
|----|------|--------------------|
| 0: | 0.00 | cm** <sup>-1</sup> |
| 1: | 0.00 | cm** <sup>-1</sup> |
| 2: | 0.00 | cm** <sup>-1</sup> |
| 3: | 0.00 | cm** <sup>-1</sup> |
| 4: | 0.00 | cm** <sup>-1</sup> |
| 5: | 0.00 | cm** <sup>-1</sup> |

6: 32.63 cm\*\*-1  
7: 52.34 cm\*\*-1  
8: 61.07 cm\*\*-1  
9: 81.63 cm\*\*-1  
10: 118.34 cm\*\*-1  
11: 135.09 cm\*\*-1  
12: 139.32 cm\*\*-1  
13: 153.29 cm\*\*-1  
14: 213.13 cm\*\*-1  
15: 230.59 cm\*\*-1  
16: 243.22 cm\*\*-1  
17: 259.56 cm\*\*-1  
18: 309.73 cm\*\*-1  
19: 339.56 cm\*\*-1  
20: 355.16 cm\*\*-1  
21: 400.21 cm\*\*-1  
22: 424.79 cm\*\*-1  
23: 484.42 cm\*\*-1  
24: 539.25 cm\*\*-1  
25: 571.11 cm\*\*-1  
26: 634.64 cm\*\*-1  
27: 730.28 cm\*\*-1  
28: 773.18 cm\*\*-1  
29: 785.43 cm\*\*-1  
30: 913.21 cm\*\*-1  
31: 916.65 cm\*\*-1  
32: 977.66 cm\*\*-1  
33: 1009.63 cm\*\*-1  
34: 1029.40 cm\*\*-1  
35: 1059.94 cm\*\*-1  
36: 1086.46 cm\*\*-1  
37: 1106.84 cm\*\*-1  
38: 1137.76 cm\*\*-1  
39: 1199.07 cm\*\*-1  
40: 1217.57 cm\*\*-1  
41: 1255.60 cm\*\*-1  
42: 1300.37 cm\*\*-1  
43: 1301.50 cm\*\*-1  
44: 1336.83 cm\*\*-1  
45: 1370.70 cm\*\*-1  
46: 1380.76 cm\*\*-1  
47: 1396.03 cm\*\*-1  
48: 1401.24 cm\*\*-1  
49: 1413.22 cm\*\*-1  
50: 1423.80 cm\*\*-1  
51: 1456.16 cm\*\*-1  
52: 1461.62 cm\*\*-1  
53: 1487.80 cm\*\*-1  
54: 1493.81 cm\*\*-1  
55: 1501.32 cm\*\*-1  
56: 1509.46 cm\*\*-1  
57: 1611.35 cm\*\*-1  
58: 1665.25 cm\*\*-1  
59: 1792.07 cm\*\*-1  
60: 1908.33 cm\*\*-1  
61: 2969.58 cm\*\*-1  
62: 2992.98 cm\*\*-1  
63: 3008.58 cm\*\*-1  
64: 3028.67 cm\*\*-1  
65: 3029.48 cm\*\*-1  
66: 3034.76 cm\*\*-1  
67: 3036.39 cm\*\*-1  
68: 3075.24 cm\*\*-1  
69: 3086.95 cm\*\*-1  
70: 3091.25 cm\*\*-1  
71: 3105.70 cm\*\*-1

72: 3153.87 cm\*\*<sup>-1</sup>  
73: 3777.17 cm\*\*<sup>-1</sup>  
74: 3875.80 cm\*\*<sup>-1</sup>

GIBBS FREE ENERGY

The Gibbs free energy is  $G = H - T \cdot S$

|                          |     |                  |                 |
|--------------------------|-----|------------------|-----------------|
| Total enthalpy           | ... | -500.85963123 Eh |                 |
| Total entropy correction | ... | -0.05430866 Eh   | -34.08 kcal/mol |
| -----                    |     |                  |                 |
| Final Gibbs free energy  | ... | -500.91393989    |                 |

**C<sub>10</sub>H<sub>18</sub>OH<sub>3</sub>O<sup>+</sup>**

CARTESIAN COORDINATES (ANGSTROEM)

## INPUT GEOMETRY OPTIMIZATION CYCLE

|   |           |           |           |
|---|-----------|-----------|-----------|
| O | 0.123330  | -2.123260 | 0.291570  |
| C | -0.628410 | 0.163410  | 0.593410  |
| C | 0.232940  | 1.386940  | 0.951330  |
| C | 2.077540  | 0.712590  | -0.665840 |
| C | 1.149730  | 1.836150  | -0.186860 |
| C | -1.801930 | 0.448940  | -0.382890 |
| C | 1.270050  | -0.521410 | -1.055550 |
| C | 0.281090  | -0.922350 | 0.018810  |
| C | 3.150870  | 0.366520  | 0.371690  |
| C | -2.664080 | -0.806000 | -0.591720 |
| C | -2.710910 | 1.583390  | 0.103010  |
| H | -1.041930 | -0.223650 | 1.534730  |
| H | 0.849390  | 1.138630  | 1.824380  |
| H | -0.388320 | 2.228710  | 1.272710  |
| H | 2.604480  | 1.066650  | -1.561280 |
| H | 0.540320  | 2.184710  | -1.029820 |
| H | 1.745710  | 2.696100  | 0.140980  |
| H | -1.403530 | 0.737140  | -1.363370 |
| H | 1.936590  | -1.369270 | -1.252140 |
| H | 0.701400  | -0.334300 | -1.973130 |
| H | 3.739060  | 1.253560  | 0.628880  |
| H | 2.723980  | -0.036720 | 1.295060  |
| H | 3.841260  | -0.385340 | -0.026140 |
| H | -3.049390 | -1.184560 | 0.361350  |
| H | -3.520400 | -0.588720 | -1.239290 |
| H | -2.095970 | -1.607400 | -1.073620 |
| H | -3.068730 | 1.396880  | 1.121200  |
| H | -3.586680 | 1.687120  | -0.547420 |
| H | -2.193160 | 2.546700  | 0.088240  |
| O | 0.003240  | -4.510730 | -0.142110 |
| H | 0.955460  | -4.680250 | -0.342790 |
| H | -0.041880 | -3.595830 | 0.286430  |
| H | -0.519860 | -4.452110 | -0.977990 |

## FINAL GEOMETRY OPTIMIZATION CYCLE

|   |           |           |           |
|---|-----------|-----------|-----------|
| O | -0.170055 | -2.027233 | 0.644075  |
| C | -0.823565 | 0.233177  | 0.582800  |
| C | 0.200254  | 1.348009  | 0.970574  |
| C | 1.954452  | 0.396206  | -0.621179 |
| C | 1.203461  | 1.650324  | -0.145821 |
| C | -1.899351 | 0.692761  | -0.465700 |
| C | 0.911521  | -0.696443 | -1.050906 |
| C | -0.041946 | -0.905402 | 0.058315  |
| C | 2.936596  | -0.161747 | 0.414205  |
| C | -2.715936 | -0.502687 | -0.974088 |
| C | -2.820974 | 1.746133  | 0.156688  |
| H | -1.353496 | -0.109739 | 1.475456  |
| H | 0.723572  | 1.033447  | 1.877336  |
| H | -0.360578 | 2.242838  | 1.241429  |
| H | 2.514182  | 0.642139  | -1.527307 |
| H | 0.692267  | 2.110993  | -0.996549 |
| H | 1.927066  | 2.388563  | 0.210438  |
| H | -1.376652 | 1.146182  | -1.314435 |
| H | 1.401727  | -1.625664 | -1.343742 |
| H | 0.347864  | -0.308108 | -1.905609 |
| H | 3.687901  | 0.589951  | 0.666193  |
| H | 2.445431  | -0.455912 | 1.347353  |
| H | 3.464109  | -1.035899 | 0.023140  |
| H | -3.209984 | -1.023489 | -0.148125 |
| H | -3.491820 | -0.165316 | -1.664138 |
| H | -2.105437 | -1.234443 | -1.514862 |
| H | -3.348069 | 1.340562  | 1.025548  |

|   |           |           |           |
|---|-----------|-----------|-----------|
| H | -3.573056 | 2.051795  | -0.574527 |
| H | -2.287794 | 2.645655  | 0.468035  |
| O | 1.236935  | -4.003531 | -0.258182 |
| H | 0.819708  | -4.728160 | -0.741197 |
| H | 0.393119  | -2.784927 | 0.269957  |
| H | 1.929809  | -4.397796 | 0.286646  |

#### VIBRATIONAL FREQUENCIES

Scaling factor for frequencies = 1.00000000 (already applied!)

|     |         |                    |
|-----|---------|--------------------|
| 0:  | 0.00    | cm** <sup>-1</sup> |
| 1:  | 0.00    | cm** <sup>-1</sup> |
| 2:  | 0.00    | cm** <sup>-1</sup> |
| 3:  | 0.00    | cm** <sup>-1</sup> |
| 4:  | 0.00    | cm** <sup>-1</sup> |
| 5:  | 0.00    | cm** <sup>-1</sup> |
| 6:  | 36.38   | cm** <sup>-1</sup> |
| 7:  | 57.16   | cm** <sup>-1</sup> |
| 8:  | 76.79   | cm** <sup>-1</sup> |
| 9:  | 88.91   | cm** <sup>-1</sup> |
| 10: | 112.20  | cm** <sup>-1</sup> |
| 11: | 134.07  | cm** <sup>-1</sup> |
| 12: | 150.66  | cm** <sup>-1</sup> |
| 13: | 182.97  | cm** <sup>-1</sup> |
| 14: | 215.04  | cm** <sup>-1</sup> |
| 15: | 222.93  | cm** <sup>-1</sup> |
| 16: | 243.00  | cm** <sup>-1</sup> |
| 17: | 252.39  | cm** <sup>-1</sup> |
| 18: | 307.86  | cm** <sup>-1</sup> |
| 19: | 339.60  | cm** <sup>-1</sup> |
| 20: | 362.77  | cm** <sup>-1</sup> |
| 21: | 369.59  | cm** <sup>-1</sup> |
| 22: | 373.29  | cm** <sup>-1</sup> |
| 23: | 393.45  | cm** <sup>-1</sup> |
| 24: | 418.12  | cm** <sup>-1</sup> |
| 25: | 433.06  | cm** <sup>-1</sup> |
| 26: | 457.79  | cm** <sup>-1</sup> |
| 27: | 525.43  | cm** <sup>-1</sup> |
| 28: | 546.42  | cm** <sup>-1</sup> |
| 29: | 592.76  | cm** <sup>-1</sup> |
| 30: | 711.09  | cm** <sup>-1</sup> |
| 31: | 757.96  | cm** <sup>-1</sup> |
| 32: | 806.98  | cm** <sup>-1</sup> |
| 33: | 831.78  | cm** <sup>-1</sup> |
| 34: | 858.48  | cm** <sup>-1</sup> |
| 35: | 896.75  | cm** <sup>-1</sup> |
| 36: | 913.72  | cm** <sup>-1</sup> |
| 37: | 936.04  | cm** <sup>-1</sup> |
| 38: | 942.99  | cm** <sup>-1</sup> |
| 39: | 959.64  | cm** <sup>-1</sup> |
| 40: | 967.08  | cm** <sup>-1</sup> |
| 41: | 994.81  | cm** <sup>-1</sup> |
| 42: | 1015.73 | cm** <sup>-1</sup> |
| 43: | 1053.49 | cm** <sup>-1</sup> |
| 44: | 1073.74 | cm** <sup>-1</sup> |
| 45: | 1100.12 | cm** <sup>-1</sup> |
| 46: | 1130.64 | cm** <sup>-1</sup> |
| 47: | 1144.93 | cm** <sup>-1</sup> |
| 48: | 1156.02 | cm** <sup>-1</sup> |
| 49: | 1183.06 | cm** <sup>-1</sup> |
| 50: | 1191.07 | cm** <sup>-1</sup> |
| 51: | 1223.35 | cm** <sup>-1</sup> |
| 52: | 1243.97 | cm** <sup>-1</sup> |
| 53: | 1260.27 | cm** <sup>-1</sup> |
| 54: | 1268.08 | cm** <sup>-1</sup> |
| 55: | 1299.49 | cm** <sup>-1</sup> |

56: 1326.71 cm\*\*-1  
57: 1349.63 cm\*\*-1  
58: 1356.82 cm\*\*-1  
59: 1362.35 cm\*\*-1  
60: 1366.52 cm\*\*-1  
61: 1368.03 cm\*\*-1  
62: 1396.29 cm\*\*-1  
63: 1412.59 cm\*\*-1  
64: 1425.50 cm\*\*-1  
65: 1433.16 cm\*\*-1  
66: 1475.42 cm\*\*-1  
67: 1481.55 cm\*\*-1  
68: 1484.62 cm\*\*-1  
69: 1488.38 cm\*\*-1  
70: 1493.39 cm\*\*-1  
71: 1497.74 cm\*\*-1  
72: 1505.21 cm\*\*-1  
73: 1505.62 cm\*\*-1  
74: 1508.82 cm\*\*-1  
75: 1517.82 cm\*\*-1  
76: 1594.66 cm\*\*-1  
77: 1646.83 cm\*\*-1  
78: 2898.57 cm\*\*-1  
79: 3016.02 cm\*\*-1  
80: 3024.01 cm\*\*-1  
81: 3027.98 cm\*\*-1  
82: 3033.31 cm\*\*-1  
83: 3041.17 cm\*\*-1  
84: 3043.24 cm\*\*-1  
85: 3054.19 cm\*\*-1  
86: 3058.87 cm\*\*-1  
87: 3067.67 cm\*\*-1  
88: 3075.45 cm\*\*-1  
89: 3079.89 cm\*\*-1  
90: 3086.94 cm\*\*-1  
91: 3097.01 cm\*\*-1  
92: 3103.18 cm\*\*-1  
93: 3103.73 cm\*\*-1  
94: 3106.08 cm\*\*-1  
95: 3114.24 cm\*\*-1  
96: 3114.76 cm\*\*-1  
97: 3785.43 cm\*\*-1  
98: 3873.64 cm\*\*-1

GIBBS FREE ENERGY

|                          |     |                  |                 |
|--------------------------|-----|------------------|-----------------|
| Total enthalpy           | ... | -543.48625851 Eh |                 |
| Total entropy correction | ... | -0.05641629 Eh   | -35.40 kcal/mol |
| -----                    |     |                  |                 |
| Final Gibbs free energy  | ... | -543.54267480 Eh |                 |

**H<sub>2</sub>ONH<sub>4</sub><sup>+</sup>**

CARTESIAN COORDINATES (ANGSTROEM)

INPUT GEOMETRY OPTIMIZATION CYCLE

|   |           |           |           |
|---|-----------|-----------|-----------|
| O | -3.154680 | 0.628800  | 0.146560  |
| H | -2.205360 | 0.584110  | -0.094170 |
| H | -3.466500 | -0.150090 | 0.653720  |
| H | -3.738070 | 0.867390  | -0.604360 |
| N | -5.075900 | -0.848130 | 1.590540  |
| H | -4.839120 | -1.417670 | 2.359070  |
| H | -6.419750 | -0.647860 | 1.134000  |
| H | -5.983050 | -0.795860 | 2.900470  |

FINAL GEOMETRY OPTIMIZATION CYCLE

|   |           |           |          |
|---|-----------|-----------|----------|
| O | -3.349257 | 0.488255  | 0.093363 |
| H | -2.387000 | 0.461121  | 0.166292 |
| H | -4.421843 | -0.266731 | 1.065464 |



|   |           |           |           |
|---|-----------|-----------|-----------|
| H | -3.552866 | 1.063529  | -0.654699 |
| N | -5.120729 | -0.759556 | 1.698491  |
| H | -4.739419 | -1.657193 | 2.007772  |
| H | -5.992954 | -0.928954 | 1.191151  |
| H | -5.318363 | -0.179781 | 2.517997  |

VIBRATIONAL FREQUENCIES

Scaling factor for frequencies = 1.00000000 (already applied!)

|     |         |                    |
|-----|---------|--------------------|
| 0:  | 0.00    | cm** <sup>-1</sup> |
| 1:  | 0.00    | cm** <sup>-1</sup> |
| 2:  | 0.00    | cm** <sup>-1</sup> |
| 3:  | 0.00    | cm** <sup>-1</sup> |
| 4:  | 0.00    | cm** <sup>-1</sup> |
| 5:  | 0.00    | cm** <sup>-1</sup> |
| 6:  | 9.49    | cm** <sup>-1</sup> |
| 7:  | 283.96  | cm** <sup>-1</sup> |
| 8:  | 306.52  | cm** <sup>-1</sup> |
| 9:  | 326.56  | cm** <sup>-1</sup> |
| 10: | 339.80  | cm** <sup>-1</sup> |
| 11: | 506.94  | cm** <sup>-1</sup> |
| 12: | 1441.55 | cm** <sup>-1</sup> |
| 13: | 1523.09 | cm** <sup>-1</sup> |
| 14: | 1551.00 | cm** <sup>-1</sup> |
| 15: | 1653.10 | cm** <sup>-1</sup> |
| 16: | 1733.22 | cm** <sup>-1</sup> |
| 17: | 1758.41 | cm** <sup>-1</sup> |
| 18: | 2799.72 | cm** <sup>-1</sup> |
| 19: | 3424.03 | cm** <sup>-1</sup> |
| 20: | 3508.48 | cm** <sup>-1</sup> |
| 21: | 3509.60 | cm** <sup>-1</sup> |
| 22: | 3789.75 | cm** <sup>-1</sup> |
| 23: | 3875.45 | cm** <sup>-1</sup> |

GIBBS FREE ENERGY

The Gibbs free energy is  $G = H - T \cdot S$

|                          |     |                  |                 |
|--------------------------|-----|------------------|-----------------|
| Total enthalpy           | ... | -133.26241765 Eh |                 |
| Total entropy correction | ... | -0.03300077 Eh   | -20.71 kcal/mol |
| -----                    |     |                  |                 |
| Final Gibbs free energy  | ... | -133.29541842    |                 |

**NH<sub>3</sub>NH<sub>4</sub><sup>+</sup>**

CARTESIAN COORDINATES (ANGSTROEM)

## INPUT GEOMETRY OPTIMIZATION CYCLE

|   |           |           |           |
|---|-----------|-----------|-----------|
| N | -0.979750 | 0.436890  | 0.050460  |
| H | -0.504510 | 1.312740  | -0.196020 |
| H | -1.172160 | 0.424210  | 1.058690  |
| H | -1.863470 | 0.369660  | -0.467410 |
| H | -0.378560 | -0.358690 | -0.193180 |
| N | -1.694860 | 0.754790  | 2.574560  |
| H | -0.674860 | 0.754790  | 2.574560  |
| H | -2.034860 | 1.558940  | 3.101950  |
| H | -2.034860 | -0.104020 | 3.007270  |

## FINAL GEOMETRY OPTIMIZATION CYCLE

|   |           |           |           |
|---|-----------|-----------|-----------|
| N | -1.013878 | 0.458790  | -0.023932 |
| H | -0.395610 | 1.209179  | -0.337997 |
| H | -1.225795 | 0.554638  | 1.098792  |
| H | -1.882589 | 0.513105  | -0.559157 |
| H | -0.564715 | -0.435513 | -0.230000 |
| N | -1.509773 | 0.687149  | 2.605574  |
| H | -0.671216 | 0.908735  | 3.141671  |
| H | -2.184909 | 1.423483  | 2.809710  |
| H | -1.889405 | -0.170255 | 3.006219  |

## VIBRATIONAL FREQUENCIES

Scaling factor for frequencies = 1.00000000 (already applied!)

|     |         |                    |
|-----|---------|--------------------|
| 0:  | 0.00    | cm** <sup>-1</sup> |
| 1:  | 0.00    | cm** <sup>-1</sup> |
| 2:  | 0.00    | cm** <sup>-1</sup> |
| 3:  | 0.00    | cm** <sup>-1</sup> |
| 4:  | 0.00    | cm** <sup>-1</sup> |
| 5:  | 0.00    | cm** <sup>-1</sup> |
| 6:  | 24.49   | cm** <sup>-1</sup> |
| 7:  | 316.28  | cm** <sup>-1</sup> |
| 8:  | 396.22  | cm** <sup>-1</sup> |
| 9:  | 396.27  | cm** <sup>-1</sup> |
| 10: | 612.54  | cm** <sup>-1</sup> |
| 11: | 612.64  | cm** <sup>-1</sup> |
| 12: | 1265.96 | cm** <sup>-1</sup> |
| 13: | 1345.51 | cm** <sup>-1</sup> |
| 14: | 1580.93 | cm** <sup>-1</sup> |
| 15: | 1581.18 | cm** <sup>-1</sup> |
| 16: | 1667.18 | cm** <sup>-1</sup> |
| 17: | 1667.23 | cm** <sup>-1</sup> |
| 18: | 1667.84 | cm** <sup>-1</sup> |
| 19: | 1758.37 | cm** <sup>-1</sup> |
| 20: | 1758.43 | cm** <sup>-1</sup> |
| 21: | 3428.73 | cm** <sup>-1</sup> |
| 22: | 3445.71 | cm** <sup>-1</sup> |
| 23: | 3523.67 | cm** <sup>-1</sup> |
| 24: | 3524.23 | cm** <sup>-1</sup> |
| 25: | 3542.79 | cm** <sup>-1</sup> |
| 26: | 3542.98 | cm** <sup>-1</sup> |

## GIBBS FREE ENERGY

The Gibbs free energy is  $G = H - T*S$ 

|                          |     |                  |                 |
|--------------------------|-----|------------------|-----------------|
| Total enthalpy           | ... | -113.38630706 Eh |                 |
| Total entropy correction | ... | -0.03176504 Eh   | -19.93 kcal/mol |
| -----                    |     |                  |                 |
| Final Gibbs free energy  | ... | -113.41807210    |                 |

**C<sub>3</sub>H<sub>6</sub>ONH<sub>4</sub><sup>+</sup>**

CARTESIAN COORDINATES (ANGSTROEM)

## INPUT GEOMETRY OPTIMIZATION CYCLE

|   |           |          |           |
|---|-----------|----------|-----------|
| C | 1.033560  | 5.947530 | 0.501940  |
| C | 1.349790  | 4.511870 | 0.712350  |
| H | 1.923140  | 6.574280 | 0.614520  |
| H | 0.287030  | 6.278530 | 1.229880  |
| H | 0.634350  | 6.108770 | -0.503910 |
| C | 0.423000  | 3.429150 | 0.297010  |
| H | -0.617700 | 3.726190 | 0.456740  |
| H | 0.602670  | 2.516330 | 0.872990  |
| H | 0.560910  | 3.200530 | -0.763900 |
| O | 2.554110  | 4.153600 | 1.270890  |
| H | 3.100650  | 4.921040 | 1.515990  |
| N | 2.381670  | 2.754740 | 0.255420  |
| H | 2.725250  | 3.102740 | 1.151450  |
| H | 1.531150  | 2.241650 | 0.484300  |
| H | 2.051000  | 3.604170 | -0.211880 |

## FINAL GEOMETRY OPTIMIZATION CYCLE

|   |           |          |           |
|---|-----------|----------|-----------|
| C | 1.070655  | 5.893937 | 0.082014  |
| C | 0.587092  | 4.559760 | 0.569348  |
| H | 2.089521  | 5.841361 | -0.300937 |
| H | 1.039264  | 6.603730 | 0.916941  |
| H | 0.401571  | 6.290743 | -0.685893 |
| C | -0.869471 | 4.406320 | 0.877588  |
| H | -1.238476 | 5.262486 | 1.448678  |
| H | -1.059447 | 3.476662 | 1.410748  |
| H | -1.426132 | 4.400001 | -0.067308 |
| O | 1.353786  | 3.605427 | 0.718822  |
| H | 2.816947  | 3.131346 | 0.584350  |
| N | 3.727415  | 2.547316 | 0.580872  |
| H | 3.577254  | 1.707209 | 1.143997  |
| H | 4.505360  | 3.077919 | 0.977148  |
| H | 3.965241  | 2.266903 | -0.372579 |

## VIBRATIONAL FREQUENCIES

Scaling factor for frequencies = 1.00000000 (already applied!)

|     |         |                    |
|-----|---------|--------------------|
| 0:  | 0.00    | cm** <sup>-1</sup> |
| 1:  | 0.00    | cm** <sup>-1</sup> |
| 2:  | 0.00    | cm** <sup>-1</sup> |
| 3:  | 0.00    | cm** <sup>-1</sup> |
| 4:  | 0.00    | cm** <sup>-1</sup> |
| 5:  | 0.00    | cm** <sup>-1</sup> |
| 6:  | 1.07    | cm** <sup>-1</sup> |
| 7:  | 61.73   | cm** <sup>-1</sup> |
| 8:  | 80.10   | cm** <sup>-1</sup> |
| 9:  | 92.44   | cm** <sup>-1</sup> |
| 10: | 121.67  | cm** <sup>-1</sup> |
| 11: | 263.46  | cm** <sup>-1</sup> |
| 12: | 383.24  | cm** <sup>-1</sup> |
| 13: | 395.17  | cm** <sup>-1</sup> |
| 14: | 409.31  | cm** <sup>-1</sup> |
| 15: | 498.63  | cm** <sup>-1</sup> |
| 16: | 557.59  | cm** <sup>-1</sup> |
| 17: | 814.16  | cm** <sup>-1</sup> |
| 18: | 883.41  | cm** <sup>-1</sup> |
| 19: | 916.50  | cm** <sup>-1</sup> |
| 20: | 1090.11 | cm** <sup>-1</sup> |
| 21: | 1116.36 | cm** <sup>-1</sup> |
| 22: | 1270.37 | cm** <sup>-1</sup> |
| 23: | 1393.49 | cm** <sup>-1</sup> |
| 24: | 1399.84 | cm** <sup>-1</sup> |
| 25: | 1413.97 | cm** <sup>-1</sup> |

26: 1448.22 cm\*\*<sup>-1</sup>  
 27: 1454.35 cm\*\*<sup>-1</sup>  
 28: 1468.97 cm\*\*<sup>-1</sup>  
 29: 1480.22 cm\*\*<sup>-1</sup>  
 30: 1532.04 cm\*\*<sup>-1</sup>  
 31: 1552.04 cm\*\*<sup>-1</sup>  
 32: 1705.11 cm\*\*<sup>-1</sup>  
 33: 1729.74 cm\*\*<sup>-1</sup>  
 34: 1736.41 cm\*\*<sup>-1</sup>  
 35: 2514.96 cm\*\*<sup>-1</sup>  
 36: 3026.79 cm\*\*<sup>-1</sup>  
 37: 3033.26 cm\*\*<sup>-1</sup>  
 38: 3086.06 cm\*\*<sup>-1</sup>  
 39: 3092.77 cm\*\*<sup>-1</sup>  
 40: 3136.78 cm\*\*<sup>-1</sup>  
 41: 3153.11 cm\*\*<sup>-1</sup>  
 42: 3432.27 cm\*\*<sup>-1</sup>  
 43: 3520.26 cm\*\*<sup>-1</sup>  
 44: 3526.08 cm\*\*<sup>-1</sup>

GIBBS FREE ENERGY

The Gibbs free energy is  $G = H - T \cdot S$

|                          |     |                  |                 |
|--------------------------|-----|------------------|-----------------|
| Total enthalpy           | ... | -249.89592433 Eh |                 |
| Total entropy correction | ... | -0.04401066 Eh   | -27.62 kcal/mol |
| -----                    |     |                  |                 |
| Final Gibbs free energy  | ... | -249.93993500    |                 |

**C<sub>3</sub>H<sub>8</sub>ONH<sub>4</sub><sup>+</sup>**

CARTESIAN COORDINATES (ANGSTROEM)

## INPUT GEOMETRY OPTIMIZATION CYCLE

|   |           |          |           |
|---|-----------|----------|-----------|
| C | -6.626280 | 1.351750 | -0.622110 |
| C | -5.695940 | 1.775750 | 0.520970  |
| H | -6.337060 | 1.779750 | -1.591730 |
| H | -7.636560 | 1.717890 | -0.436150 |
| H | -6.680250 | 0.264490 | -0.722650 |
| C | -4.307160 | 1.207820 | 0.427960  |
| H | -6.083680 | 1.401310 | 1.476380  |
| H | -5.645210 | 2.863800 | 0.617810  |
| O | -3.677490 | 1.748770 | -0.903120 |
| H | -4.265660 | 0.123280 | 0.331530  |
| H | -3.608700 | 1.583710 | 1.171790  |
| H | -2.804690 | 1.381980 | -1.133280 |
| H | -4.290010 | 1.672500 | -1.659390 |
| N | -3.885720 | 1.307150 | -2.548260 |
| H | -5.273900 | 1.327240 | -3.074350 |
| H | -4.097130 | 1.250100 | -3.995010 |
| H | -2.735530 | 1.218110 | -3.758270 |

## FINAL GEOMETRY OPTIMIZATION CYCLE

|   |           |          |           |
|---|-----------|----------|-----------|
| C | -6.631068 | 1.504264 | -0.507288 |
| C | -5.639074 | 1.678686 | 0.644991  |
| H | -6.355222 | 2.116321 | -1.372505 |
| H | -7.634060 | 1.814819 | -0.210010 |
| H | -6.695829 | 0.455640 | -0.819043 |
| C | -4.239860 | 1.177274 | 0.330138  |
| H | -5.986062 | 1.123702 | 1.523349  |
| H | -5.592265 | 2.729835 | 0.952147  |
| O | -3.636162 | 1.874574 | -0.808772 |
| H | -4.250863 | 0.125474 | 0.034794  |
| H | -3.563775 | 1.280271 | 1.180791  |
| H | -3.392903 | 2.773752 | -0.558036 |
| H | -3.855835 | 1.433910 | -2.251933 |
| N | -4.007501 | 1.061389 | -3.264458 |
| H | -4.963457 | 0.715119 | -3.367955 |
| H | -3.853748 | 1.809427 | -3.943697 |
| H | -3.353288 | 0.300941 | -3.460394 |

## VIBRATIONAL FREQUENCIES

Scaling factor for frequencies = 1.00000000 (already applied!)

|     |         |                    |
|-----|---------|--------------------|
| 0:  | 0.00    | cm** <sup>-1</sup> |
| 1:  | 0.00    | cm** <sup>-1</sup> |
| 2:  | 0.00    | cm** <sup>-1</sup> |
| 3:  | 0.00    | cm** <sup>-1</sup> |
| 4:  | 0.00    | cm** <sup>-1</sup> |
| 5:  | 0.00    | cm** <sup>-1</sup> |
| 6:  | 37.06   | cm** <sup>-1</sup> |
| 7:  | 45.94   | cm** <sup>-1</sup> |
| 8:  | 88.39   | cm** <sup>-1</sup> |
| 9:  | 164.27  | cm** <sup>-1</sup> |
| 10: | 236.67  | cm** <sup>-1</sup> |
| 11: | 283.60  | cm** <sup>-1</sup> |
| 12: | 312.29  | cm** <sup>-1</sup> |
| 13: | 347.48  | cm** <sup>-1</sup> |
| 14: | 381.79  | cm** <sup>-1</sup> |
| 15: | 476.93  | cm** <sup>-1</sup> |
| 16: | 489.92  | cm** <sup>-1</sup> |
| 17: | 768.02  | cm** <sup>-1</sup> |
| 18: | 857.57  | cm** <sup>-1</sup> |
| 19: | 903.02  | cm** <sup>-1</sup> |
| 20: | 938.47  | cm** <sup>-1</sup> |
| 21: | 1059.38 | cm** <sup>-1</sup> |

22: 1094.96 cm\*\*-1  
 23: 1105.68 cm\*\*-1  
 24: 1235.46 cm\*\*-1  
 25: 1302.61 cm\*\*-1  
 26: 1365.71 cm\*\*-1  
 27: 1381.57 cm\*\*-1  
 28: 1404.74 cm\*\*-1  
 29: 1414.53 cm\*\*-1  
 30: 1419.83 cm\*\*-1  
 31: 1480.49 cm\*\*-1  
 32: 1498.50 cm\*\*-1  
 33: 1505.86 cm\*\*-1  
 34: 1508.42 cm\*\*-1  
 35: 1530.84 cm\*\*-1  
 36: 1575.53 cm\*\*-1  
 37: 1723.57 cm\*\*-1  
 38: 1769.27 cm\*\*-1  
 39: 2399.64 cm\*\*-1  
 40: 3011.34 cm\*\*-1  
 41: 3025.98 cm\*\*-1  
 42: 3050.22 cm\*\*-1  
 43: 3060.66 cm\*\*-1  
 44: 3076.49 cm\*\*-1  
 45: 3107.26 cm\*\*-1  
 46: 3110.17 cm\*\*-1  
 47: 3430.56 cm\*\*-1  
 48: 3520.90 cm\*\*-1  
 49: 3522.19 cm\*\*-1  
 50: 3814.16 cm\*\*-1

GIBBS FREE ENERGY

The Gibbs free energy is  $G = H - T \cdot S$

|                          |     |                  |                 |
|--------------------------|-----|------------------|-----------------|
| Total enthalpy           | ... | -251.06325928 Eh |                 |
| Total entropy correction | ... | -0.04212718 Eh   | -26.44 kcal/mol |
| -----                    |     |                  |                 |
| Final Gibbs free energy  | ... | -251.10538645    |                 |

**C<sub>4</sub>H<sub>6</sub>ONH<sub>4</sub><sup>+</sup>**

CARTESIAN COORDINATES (ANGSTROEM)

## INPUT GEOMETRY OPTIMIZATION CYCLE

|   |           |           |           |
|---|-----------|-----------|-----------|
| C | -5.798070 | 1.534670  | 0.024140  |
| C | -4.632910 | 0.773340  | 0.155210  |
| C | -3.427630 | 1.369020  | -0.107730 |
| C | -2.116910 | 0.713400  | -0.022180 |
| H | -2.167940 | -0.330540 | 0.283280  |
| H | -1.475920 | 1.276610  | 0.670810  |
| H | -1.609680 | 0.795150  | -0.994150 |
| H | -4.691130 | -0.268570 | 0.458090  |
| H | -3.431190 | 2.416810  | -0.407370 |
| O | -7.002120 | 1.127790  | 0.228960  |
| H | -5.761380 | 2.579530  | -0.277260 |
| H | -7.071880 | 0.195310  | 0.502470  |
| N | -7.026540 | -0.981210 | 2.735440  |
| H | -5.850720 | -0.945910 | 3.130430  |
| H | -7.734080 | -0.504510 | 3.878320  |
| H | -7.205320 | -0.737610 | 1.502710  |

## FINAL GEOMETRY OPTIMIZATION CYCLE

|   |           |           |           |
|---|-----------|-----------|-----------|
| C | -5.526407 | 1.409174  | 0.355630  |
| C | -4.205343 | 0.840658  | 0.357763  |
| C | -3.224138 | 1.420116  | -0.366288 |
| C | -1.821141 | 0.949115  | -0.461793 |
| H | -1.635185 | 0.055919  | 0.135153  |
| H | -1.137708 | 1.744300  | -0.142036 |
| H | -1.568352 | 0.741198  | -1.508109 |
| H | -4.022632 | -0.052360 | 0.948657  |
| H | -3.473653 | 2.314292  | -0.937058 |
| O | -6.503952 | 0.970727  | 0.974868  |
| H | -5.670704 | 2.314388  | -0.254021 |
| H | -7.037600 | -0.106725 | 1.902413  |
| N | -7.642472 | -0.747054 | 2.537432  |
| H | -7.326626 | -0.691877 | 3.507295  |
| H | -8.613281 | -0.430593 | 2.487274  |
| H | -7.594226 | -1.717998 | 2.223990  |

## VIBRATIONAL FREQUENCIES

Scaling factor for frequencies = 1.00000000 (already applied!)

|     |         |                    |
|-----|---------|--------------------|
| 0:  | 0.00    | cm** <sup>-1</sup> |
| 1:  | 0.00    | cm** <sup>-1</sup> |
| 2:  | 0.00    | cm** <sup>-1</sup> |
| 3:  | 0.00    | cm** <sup>-1</sup> |
| 4:  | 0.00    | cm** <sup>-1</sup> |
| 5:  | 0.00    | cm** <sup>-1</sup> |
| 6:  | 18.93   | cm** <sup>-1</sup> |
| 7:  | 44.58   | cm** <sup>-1</sup> |
| 8:  | 75.16   | cm** <sup>-1</sup> |
| 9:  | 146.14  | cm** <sup>-1</sup> |
| 10: | 196.54  | cm** <sup>-1</sup> |
| 11: | 205.71  | cm** <sup>-1</sup> |
| 12: | 300.42  | cm** <sup>-1</sup> |
| 13: | 324.50  | cm** <sup>-1</sup> |
| 14: | 402.09  | cm** <sup>-1</sup> |
| 15: | 405.69  | cm** <sup>-1</sup> |
| 16: | 482.62  | cm** <sup>-1</sup> |
| 17: | 553.84  | cm** <sup>-1</sup> |
| 18: | 809.38  | cm** <sup>-1</sup> |
| 19: | 942.27  | cm** <sup>-1</sup> |
| 20: | 984.52  | cm** <sup>-1</sup> |
| 21: | 1036.92 | cm** <sup>-1</sup> |
| 22: | 1075.32 | cm** <sup>-1</sup> |
| 23: | 1124.19 | cm** <sup>-1</sup> |

24: 1200.64 cm\*\*-1  
 25: 1293.42 cm\*\*-1  
 26: 1332.98 cm\*\*-1  
 27: 1402.57 cm\*\*-1  
 28: 1405.78 cm\*\*-1  
 29: 1426.72 cm\*\*-1  
 30: 1464.68 cm\*\*-1  
 31: 1476.86 cm\*\*-1  
 32: 1531.23 cm\*\*-1  
 33: 1553.95 cm\*\*-1  
 34: 1665.71 cm\*\*-1  
 35: 1669.87 cm\*\*-1  
 36: 1727.19 cm\*\*-1  
 37: 1733.93 cm\*\*-1  
 38: 2450.20 cm\*\*-1  
 39: 3011.06 cm\*\*-1  
 40: 3018.99 cm\*\*-1  
 41: 3062.38 cm\*\*-1  
 42: 3116.95 cm\*\*-1  
 43: 3133.95 cm\*\*-1  
 44: 3159.58 cm\*\*-1  
 45: 3433.85 cm\*\*-1  
 46: 3522.70 cm\*\*-1  
 47: 3529.55 cm\*\*-1

#### GIBBS FREE ENERGY

The Gibbs free energy is  $G = H - T*S$

|                          |     |                  |                 |
|--------------------------|-----|------------------|-----------------|
| Total enthalpy           | ... | -287.96097916 Eh |                 |
| Total entropy correction | ... | -0.04393237 Eh   | -27.57 kcal/mol |
| -----                    |     |                  |                 |
| Final Gibbs free energy  | ... | -288.00491153    |                 |



**C<sub>7</sub>H<sub>12</sub>ONH<sub>4</sub><sup>+</sup>**

CARTESIAN COORDINATES (ANGSTROEM)

## INPUT GEOMETRY OPTIMIZATION CYCLE

|   |           |           |           |
|---|-----------|-----------|-----------|
| C | -4.264660 | 0.367330  | 0.030780  |
| C | -3.033900 | -0.270800 | 0.169130  |
| C | -2.006630 | 0.082410  | -0.671760 |
| C | -0.646960 | -0.455490 | -0.624720 |
| C | 0.333340  | 0.655850  | -0.106590 |
| H | -0.327920 | -0.719260 | -1.640330 |
| H | -0.580270 | -1.339850 | 0.011670  |
| C | 1.777460  | 0.139270  | -0.077420 |
| H | 0.023420  | 0.965190  | 0.896240  |
| H | 0.261540  | 1.534800  | -0.755010 |
| C | 2.748120  | 1.200380  | 0.446140  |
| H | 2.069030  | -0.169810 | -1.086940 |
| H | 1.829690  | -0.755260 | 0.552510  |
| H | 2.744350  | 2.092460  | -0.186400 |
| H | 3.768030  | 0.809490  | 0.462570  |
| H | 2.494210  | 1.506460  | 1.465020  |
| H | -2.898270 | -1.041890 | 0.922760  |
| H | -2.199660 | 0.860960  | -1.410030 |
| O | -5.328230 | 0.136810  | 0.725750  |
| H | -4.420790 | 1.142650  | -0.716030 |
| H | -5.218680 | -0.553480 | 1.403730  |
| N | -5.391410 | -0.898140 | 2.950260  |
| H | -4.499690 | -0.974260 | 3.091940  |
| H | -6.013460 | 0.278390  | 2.976380  |
| H | -6.136770 | -2.193580 | 3.723490  |

## FINAL GEOMETRY OPTIMIZATION CYCLE

|   |           |           |           |
|---|-----------|-----------|-----------|
| C | -4.143915 | 0.394028  | 0.259014  |
| C | -2.850778 | -0.214589 | 0.396651  |
| C | -1.849941 | 0.137848  | -0.440203 |
| C | -0.465115 | -0.392420 | -0.417163 |
| C | 0.579458  | 0.723976  | -0.183570 |
| H | -0.261401 | -0.852586 | -1.393843 |
| H | -0.363436 | -1.174867 | 0.340094  |
| C | 2.014300  | 0.186834  | -0.208901 |
| H | 0.381742  | 1.206350  | 0.780255  |
| H | 0.462816  | 1.497970  | -0.951048 |
| C | 3.055598  | 1.283806  | 0.022438  |
| H | 2.198180  | -0.300459 | -1.173506 |
| H | 2.122010  | -0.591879 | 0.555212  |
| H | 2.993500  | 2.058182  | -0.747927 |
| H | 4.067963  | 0.873831  | -0.000436 |
| H | 2.915064  | 1.766940  | 0.994136  |
| H | -2.703397 | -0.959522 | 1.173506  |
| H | -2.061859 | 0.894226  | -1.196639 |
| O | -5.141146 | 0.147508  | 0.951816  |
| H | -4.251036 | 1.144957  | -0.538616 |
| H | -5.697294 | -0.649138 | 2.100744  |
| N | -6.323311 | -1.092615 | 2.874799  |
| H | -5.824070 | -1.149799 | 3.763561  |
| H | -7.152904 | -0.508019 | 2.996465  |
| H | -6.619136 | -2.029930 | 2.596301  |

## VIBRATIONAL FREQUENCIES

Scaling factor for frequencies = 1.00000000 (already applied!)

|    |      |                    |
|----|------|--------------------|
| 0: | 0.00 | cm** <sup>-1</sup> |
| 1: | 0.00 | cm** <sup>-1</sup> |
| 2: | 0.00 | cm** <sup>-1</sup> |
| 3: | 0.00 | cm** <sup>-1</sup> |
| 4: | 0.00 | cm** <sup>-1</sup> |
| 5: | 0.00 | cm** <sup>-1</sup> |

6: 12.24 cm\*\*-1  
7: 26.08 cm\*\*-1  
8: 39.62 cm\*\*-1  
9: 66.05 cm\*\*-1  
10: 72.61 cm\*\*-1  
11: 108.64 cm\*\*-1  
12: 147.25 cm\*\*-1  
13: 174.75 cm\*\*-1  
14: 211.41 cm\*\*-1  
15: 241.32 cm\*\*-1  
16: 275.33 cm\*\*-1  
17: 301.62 cm\*\*-1  
18: 347.99 cm\*\*-1  
19: 401.64 cm\*\*-1  
20: 414.32 cm\*\*-1  
21: 446.98 cm\*\*-1  
22: 510.89 cm\*\*-1  
23: 581.27 cm\*\*-1  
24: 739.70 cm\*\*-1  
25: 796.33 cm\*\*-1  
26: 848.52 cm\*\*-1  
27: 905.44 cm\*\*-1  
28: 938.59 cm\*\*-1  
29: 985.26 cm\*\*-1  
30: 1001.72 cm\*\*-1  
31: 1040.26 cm\*\*-1  
32: 1050.88 cm\*\*-1  
33: 1058.94 cm\*\*-1  
34: 1114.97 cm\*\*-1  
35: 1146.23 cm\*\*-1  
36: 1203.86 cm\*\*-1  
37: 1226.05 cm\*\*-1  
38: 1261.07 cm\*\*-1  
39: 1291.68 cm\*\*-1  
40: 1318.95 cm\*\*-1  
41: 1328.36 cm\*\*-1  
42: 1338.28 cm\*\*-1  
43: 1354.60 cm\*\*-1  
44: 1388.33 cm\*\*-1  
45: 1400.99 cm\*\*-1  
46: 1418.93 cm\*\*-1  
47: 1429.85 cm\*\*-1  
48: 1476.67 cm\*\*-1  
49: 1488.30 cm\*\*-1  
50: 1496.85 cm\*\*-1  
51: 1500.13 cm\*\*-1  
52: 1510.37 cm\*\*-1  
53: 1533.44 cm\*\*-1  
54: 1554.46 cm\*\*-1  
55: 1656.57 cm\*\*-1  
56: 1659.01 cm\*\*-1  
57: 1726.25 cm\*\*-1  
58: 1732.83 cm\*\*-1  
59: 2393.65 cm\*\*-1  
60: 3001.43 cm\*\*-1  
61: 3009.07 cm\*\*-1  
62: 3012.15 cm\*\*-1  
63: 3018.66 cm\*\*-1  
64: 3025.17 cm\*\*-1  
65: 3032.43 cm\*\*-1  
66: 3053.91 cm\*\*-1  
67: 3073.84 cm\*\*-1  
68: 3086.61 cm\*\*-1  
69: 3096.82 cm\*\*-1  
70: 3120.09 cm\*\*-1  
71: 3157.97 cm\*\*-1

72: 3435.45 cm\*\*<sup>-1</sup>  
73: 3524.57 cm\*\*<sup>-1</sup>  
74: 3532.29 cm\*\*<sup>-1</sup>

GIBBS FREE ENERGY

The Gibbs free energy is  $G = H - T*S$

|                          |     |                  |                 |
|--------------------------|-----|------------------|-----------------|
| Total enthalpy           | ... | -405.77117832 Eh |                 |
| Total entropy correction | ... | -0.05359825 Eh   | -33.63 kcal/mol |
| -----                    |     |                  |                 |
| Final Gibbs free energy  | ... | -405.82477657    |                 |

**C<sub>7</sub>H<sub>14</sub>ONH<sub>4</sub><sup>+</sup>**

CARTESIAN COORDINATES (ANGSTROEM)

## INPUT GEOMETRY OPTIMIZATION CYCLE

|   |           |           |           |
|---|-----------|-----------|-----------|
| C | -5.565090 | 0.986190  | -0.168500 |
| C | -4.245290 | 1.582890  | 0.119850  |
| H | -5.667000 | 0.944420  | -1.263690 |
| H | -6.396380 | 1.569920  | 0.232820  |
| H | -5.611950 | -0.044560 | 0.187920  |
| C | -3.004580 | 0.796340  | 0.115070  |
| C | -1.679290 | 1.561710  | 0.038600  |
| H | -3.100350 | 0.029310  | -0.665360 |
| H | -3.062600 | 0.210630  | 1.053600  |
| C | -0.481750 | 0.605370  | 0.041950  |
| H | -1.606360 | 2.255170  | 0.880940  |
| H | -1.668200 | 2.169380  | -0.872310 |
| C | 0.858680  | 1.343140  | -0.042830 |
| H | -0.565940 | -0.092210 | -0.800860 |
| H | -0.504140 | -0.005900 | 0.953070  |
| C | 2.056540  | 0.391160  | -0.041350 |
| H | 0.939800  | 2.039970  | 0.799620  |
| H | 0.875790  | 1.955610  | -0.952080 |
| H | 2.085140  | -0.209780 | 0.872480  |
| H | 2.996140  | 0.944290  | -0.103500 |
| H | 2.019270  | -0.295640 | -0.892260 |
| O | -4.131740 | 2.832900  | 0.374950  |
| H | -4.979200 | 3.314890  | 0.398910  |
| N | -5.585070 | 4.697360  | 0.423020  |
| H | -4.565070 | 4.697360  | 0.423020  |
| H | -5.925070 | 5.407570  | -0.225370 |
| H | -5.925070 | 4.903780  | 1.362270  |

## FINAL GEOMETRY OPTIMIZATION CYCLE

|   |           |           |           |
|---|-----------|-----------|-----------|
| C | -5.557234 | 0.784371  | -0.116097 |
| C | -4.251881 | 1.495340  | 0.100263  |
| H | -5.683216 | 0.618375  | -1.192817 |
| H | -6.401106 | 1.371256  | 0.247635  |
| H | -5.554497 | -0.200409 | 0.355292  |
| C | -2.993683 | 0.680982  | 0.059908  |
| C | -1.685577 | 1.468807  | 0.055462  |
| H | -3.062995 | 0.006724  | -0.804584 |
| H | -3.041899 | 0.006335  | 0.928629  |
| C | -0.458763 | 0.552915  | 0.008813  |
| H | -1.641099 | 2.103736  | 0.945882  |
| H | -1.673648 | 2.145713  | -0.805865 |
| C | 0.864316  | 1.324961  | 0.001306  |
| H | -0.510847 | -0.083981 | -0.883476 |
| H | -0.476579 | -0.126828 | 0.870362  |
| C | 2.088365  | 0.408074  | -0.048965 |
| H | 0.916232  | 1.958723  | 0.895017  |
| H | 0.878957  | 2.005636  | -0.858667 |
| H | 2.116804  | -0.261499 | 0.816114  |
| H | 3.016033  | 0.985316  | -0.052175 |
| H | 2.080847  | -0.213341 | -0.949682 |
| O | -4.205923 | 2.713872  | 0.292712  |
| H | -5.056896 | 3.961451  | 0.398587  |
| N | -5.448485 | 4.974752  | 0.477256  |
| H | -4.668131 | 5.632568  | 0.420765  |
| H | -6.102104 | 5.171156  | -0.282595 |
| H | -5.925770 | 5.106265  | 1.370899  |

## VIBRATIONAL FREQUENCIES

Scaling factor for frequencies = 1.00000000 (already applied!)

|    |                         |
|----|-------------------------|
| 0: | 0.00 cm** <sup>-1</sup> |
| 1: | 0.00 cm** <sup>-1</sup> |

2: 0.00 cm\*\*-1  
3: 0.00 cm\*\*-1  
4: 0.00 cm\*\*-1  
5: 0.00 cm\*\*-1  
6: 18.81 cm\*\*-1  
7: 36.23 cm\*\*-1  
8: 41.35 cm\*\*-1  
9: 54.20 cm\*\*-1  
10: 82.63 cm\*\*-1  
11: 99.68 cm\*\*-1  
12: 103.74 cm\*\*-1  
13: 120.38 cm\*\*-1  
14: 138.65 cm\*\*-1  
15: 193.78 cm\*\*-1  
16: 243.84 cm\*\*-1  
17: 290.18 cm\*\*-1  
18: 302.10 cm\*\*-1  
19: 393.18 cm\*\*-1  
20: 408.01 cm\*\*-1  
21: 436.56 cm\*\*-1  
22: 465.33 cm\*\*-1  
23: 484.93 cm\*\*-1  
24: 612.20 cm\*\*-1  
25: 719.32 cm\*\*-1  
26: 745.33 cm\*\*-1  
27: 818.73 cm\*\*-1  
28: 851.09 cm\*\*-1  
29: 914.50 cm\*\*-1  
30: 933.02 cm\*\*-1  
31: 966.74 cm\*\*-1  
32: 1008.91 cm\*\*-1  
33: 1028.69 cm\*\*-1  
34: 1058.55 cm\*\*-1  
35: 1066.54 cm\*\*-1  
36: 1133.93 cm\*\*-1  
37: 1149.47 cm\*\*-1  
38: 1196.37 cm\*\*-1  
39: 1226.83 cm\*\*-1  
40: 1280.27 cm\*\*-1  
41: 1291.46 cm\*\*-1  
42: 1328.72 cm\*\*-1  
43: 1336.73 cm\*\*-1  
44: 1350.39 cm\*\*-1  
45: 1391.78 cm\*\*-1  
46: 1401.05 cm\*\*-1  
47: 1404.59 cm\*\*-1  
48: 1408.76 cm\*\*-1  
49: 1418.96 cm\*\*-1  
50: 1430.66 cm\*\*-1  
51: 1455.73 cm\*\*-1  
52: 1478.12 cm\*\*-1  
53: 1486.81 cm\*\*-1  
54: 1489.95 cm\*\*-1  
55: 1500.67 cm\*\*-1  
56: 1500.88 cm\*\*-1  
57: 1511.93 cm\*\*-1  
58: 1536.78 cm\*\*-1  
59: 1556.96 cm\*\*-1  
60: 1691.46 cm\*\*-1  
61: 1730.05 cm\*\*-1  
62: 1735.53 cm\*\*-1  
63: 2401.34 cm\*\*-1  
64: 2992.80 cm\*\*-1  
65: 2997.08 cm\*\*-1  
66: 3006.37 cm\*\*-1  
67: 3017.36 cm\*\*-1

68: 3021.88 cm\*\*-1  
69: 3023.07 cm\*\*-1  
70: 3027.28 cm\*\*-1  
71: 3030.00 cm\*\*-1  
72: 3040.21 cm\*\*-1  
73: 3068.65 cm\*\*-1  
74: 3083.50 cm\*\*-1  
75: 3094.36 cm\*\*-1  
76: 3095.43 cm\*\*-1  
77: 3134.75 cm\*\*-1  
78: 3433.78 cm\*\*-1  
79: 3523.12 cm\*\*-1  
80: 3529.14 cm\*\*-1

#### GIBBS FREE ENERGY

The Gibbs free energy is  $G = H - T \cdot S$

|                          |     |                  |                 |
|--------------------------|-----|------------------|-----------------|
| Total enthalpy           | ... | -406.97662178 Eh |                 |
| Total entropy correction | ... | -0.05515792 Eh   | -34.61 kcal/mol |
| -----                    |     |                  |                 |
| Final Gibbs free energy  | ... | -407.03177970    |                 |

**C<sub>7</sub>H<sub>14</sub>ONH<sub>4</sub><sup>+</sup>**

CARTESIAN COORDINATES (ANGSTROEM)

## INPUT GEOMETRY OPTIMIZATION CYCLE

|   |           |           |           |
|---|-----------|-----------|-----------|
| O | 3.818610  | 0.770450  | -0.004410 |
| C | -0.449600 | -0.656670 | 0.049180  |
| C | -1.579180 | 0.367800  | -0.071970 |
| C | 0.920430  | 0.007070  | -0.111090 |
| C | -2.949300 | -0.294720 | 0.068230  |
| C | 2.053810  | -1.005170 | 0.056160  |
| C | -4.073080 | 0.723820  | -0.038280 |
| C | 3.410380  | -0.503330 | -0.300010 |
| H | -0.506590 | -1.152760 | 1.025720  |
| H | -0.573230 | -1.432490 | -0.716160 |
| H | -1.514080 | 0.874560  | -1.042560 |
| H | -1.461680 | 1.136390  | 0.701760  |
| H | 1.019830  | 0.794680  | 0.643990  |
| H | 0.983420  | 0.484800  | -1.096530 |
| H | -3.076990 | -1.054180 | -0.711920 |
| H | -3.018870 | -0.807290 | 1.034700  |
| H | 1.851830  | -1.876660 | -0.578640 |
| H | 2.073570  | -1.369360 | 1.089980  |
| H | -5.044200 | 0.228720  | 0.059960  |
| H | -4.048720 | 1.235490  | -1.005720 |
| H | -3.994800 | 1.477870  | 0.751460  |
| H | 4.254960  | -1.156500 | -0.473730 |
| H | 3.095730  | 1.413130  | 0.178250  |
| N | 2.434490  | 3.183810  | 0.295960  |
| H | 1.749920  | 3.517120  | -0.386070 |
| H | 3.312260  | 3.639210  | 0.031050  |
| H | 2.166240  | 3.624090  | 1.178480  |

## FINAL GEOMETRY OPTIMIZATION CYCLE

|   |           |           |           |
|---|-----------|-----------|-----------|
| O | 3.709231  | 0.747972  | 0.038636  |
| C | -0.470711 | -0.670366 | 0.027853  |
| C | -1.618529 | 0.341781  | -0.005080 |
| C | 0.910315  | -0.006344 | 0.025064  |
| C | -3.004877 | -0.311137 | 0.001690  |
| C | 2.057295  | -1.014019 | 0.036739  |
| C | -4.144922 | 0.708471  | -0.037701 |
| C | 3.433373  | -0.445568 | 0.038973  |
| H | -0.565513 | -1.302942 | 0.918310  |
| H | -0.549882 | -1.340770 | -0.836138 |
| H | -1.522973 | 0.970913  | -0.900805 |
| H | -1.535876 | 1.015654  | 0.859016  |
| H | 0.992642  | 0.646666  | 0.904105  |
| H | 0.998289  | 0.629008  | -0.866221 |
| H | -3.086457 | -0.987919 | -0.856854 |
| H | -3.102137 | -0.937588 | 0.896044  |
| H | 2.006880  | -1.697695 | -0.824207 |
| H | 1.999943  | -1.686742 | 0.906041  |
| H | -5.118477 | 0.212992  | -0.031989 |
| H | -4.093920 | 1.326562  | -0.939654 |
| H | -4.109753 | 1.377360  | 0.828144  |
| H | 4.267348  | -1.166099 | 0.040666  |
| H | 2.981159  | 2.123059  | 0.053442  |
| N | 2.675159  | 3.157976  | 0.080423  |
| H | 1.667917  | 3.238023  | -0.068576 |
| H | 3.166629  | 3.678966  | -0.649025 |
| H | 2.913005  | 3.561665  | 0.988894  |

## VIBRATIONAL FREQUENCIES

Scaling factor for frequencies = 1.00000000 (already applied!)

|    |                         |
|----|-------------------------|
| 0: | 0.00 cm** <sup>-1</sup> |
| 1: | 0.00 cm** <sup>-1</sup> |

2: 0.00 cm\*\*-1  
3: 0.00 cm\*\*-1  
4: 0.00 cm\*\*-1  
5: 0.00 cm\*\*-1  
6: 36.74 cm\*\*-1  
7: 41.02 cm\*\*-1  
8: 48.52 cm\*\*-1  
9: 59.50 cm\*\*-1  
10: 91.74 cm\*\*-1  
11: 93.80 cm\*\*-1  
12: 138.58 cm\*\*-1  
13: 146.82 cm\*\*-1  
14: 190.56 cm\*\*-1  
15: 214.83 cm\*\*-1  
16: 244.62 cm\*\*-1  
17: 272.57 cm\*\*-1  
18: 307.10 cm\*\*-1  
19: 374.91 cm\*\*-1  
20: 402.10 cm\*\*-1  
21: 415.27 cm\*\*-1  
22: 454.89 cm\*\*-1  
23: 660.18 cm\*\*-1  
24: 706.76 cm\*\*-1  
25: 737.73 cm\*\*-1  
26: 769.56 cm\*\*-1  
27: 852.91 cm\*\*-1  
28: 890.57 cm\*\*-1  
29: 922.61 cm\*\*-1  
30: 941.48 cm\*\*-1  
31: 1014.02 cm\*\*-1  
32: 1022.29 cm\*\*-1  
33: 1052.57 cm\*\*-1  
34: 1064.23 cm\*\*-1  
35: 1071.75 cm\*\*-1  
36: 1138.40 cm\*\*-1  
37: 1165.65 cm\*\*-1  
38: 1222.37 cm\*\*-1  
39: 1253.12 cm\*\*-1  
40: 1278.26 cm\*\*-1  
41: 1313.03 cm\*\*-1  
42: 1314.82 cm\*\*-1  
43: 1335.29 cm\*\*-1  
44: 1337.99 cm\*\*-1  
45: 1376.81 cm\*\*-1  
46: 1395.71 cm\*\*-1  
47: 1400.31 cm\*\*-1  
48: 1409.93 cm\*\*-1  
49: 1417.05 cm\*\*-1  
50: 1418.57 cm\*\*-1  
51: 1432.21 cm\*\*-1  
52: 1486.25 cm\*\*-1  
53: 1487.91 cm\*\*-1  
54: 1495.74 cm\*\*-1  
55: 1501.29 cm\*\*-1  
56: 1505.44 cm\*\*-1  
57: 1513.29 cm\*\*-1  
58: 1541.83 cm\*\*-1  
59: 1544.81 cm\*\*-1  
60: 1722.93 cm\*\*-1  
61: 1734.14 cm\*\*-1  
62: 1739.56 cm\*\*-1  
63: 2540.96 cm\*\*-1  
64: 2980.57 cm\*\*-1  
65: 2986.12 cm\*\*-1  
66: 2992.21 cm\*\*-1  
67: 3005.53 cm\*\*-1



68: 3006.38 cm\*\*-1  
69: 3008.14 cm\*\*-1  
70: 3010.63 cm\*\*-1  
71: 3016.55 cm\*\*-1  
72: 3020.96 cm\*\*-1  
73: 3024.19 cm\*\*-1  
74: 3041.73 cm\*\*-1  
75: 3057.56 cm\*\*-1  
76: 3080.22 cm\*\*-1  
77: 3095.69 cm\*\*-1  
78: 3431.48 cm\*\*-1  
79: 3519.81 cm\*\*-1  
80: 3527.80 cm\*\*-1

#### GIBBS FREE ENERGY

The Gibbs free energy is  $G = H - T \cdot S$

|                          |     |                  |                 |
|--------------------------|-----|------------------|-----------------|
| Total enthalpy           | ... | -406.96084112 Eh |                 |
| Total entropy correction | ... | -0.05388252 Eh   | -33.81 kcal/mol |
| -----                    |     |                  |                 |
| Final Gibbs free energy  | ... | -407.01472364    |                 |

**C<sub>7</sub>H<sub>12</sub>O<sub>2</sub>NH<sub>4</sub><sup>+</sup>**

CARTESIAN COORDINATES (ANGSTROEM)

## INPUT GEOMETRY OPTIMIZATION CYCLE

|   |           |           |           |
|---|-----------|-----------|-----------|
| C | -5.867060 | 1.924390  | -0.419770 |
| C | -4.581880 | 2.109510  | 0.316230  |
| H | -6.650590 | 2.480650  | 0.091400  |
| H | -6.133390 | 0.863540  | -0.469560 |
| H | -5.772200 | 2.277810  | -1.451940 |
| C | -3.315040 | 1.391050  | -0.230820 |
| C | -2.013830 | 1.538340  | 0.416250  |
| C | -0.853320 | 0.760020  | -0.204570 |
| H | -2.173570 | 1.302330  | 1.481510  |
| H | -1.824680 | 2.625110  | 0.460450  |
| C | 0.470340  | 1.010450  | 0.536810  |
| H | -0.721840 | 1.054390  | -1.255650 |
| H | -1.069020 | -0.316960 | -0.181500 |
| C | 1.636800  | 0.239270  | -0.080800 |
| H | 0.347120  | 0.725570  | 1.587270  |
| H | 0.684280  | 2.084700  | 0.526150  |
| H | 1.461600  | -0.840040 | -0.052240 |
| H | 2.560090  | 0.438280  | 0.466030  |
| H | 1.800190  | 0.529610  | -1.122660 |
| O | -4.396310 | 2.763910  | 1.307120  |
| O | -3.494120 | 0.679300  | -1.268840 |
| H | -2.672220 | 0.243510  | -1.583590 |
| N | -3.697370 | 0.122020  | -2.101320 |
| H | -2.677370 | 0.122020  | -2.101320 |
| H | -4.037360 | 0.528580  | -1.229820 |
| H | -4.037370 | -0.836000 | -2.184980 |

## FINAL GEOMETRY OPTIMIZATION CYCLE

|   |           |           |           |
|---|-----------|-----------|-----------|
| C | -4.910996 | 2.378317  | 0.616246  |
| C | -4.525214 | 1.479769  | -0.515204 |
| H | -5.985215 | 2.553792  | 0.599719  |
| H | -4.382136 | 3.334207  | 0.532196  |
| H | -4.619445 | 1.941811  | 1.576261  |
| C | -3.021961 | 1.036538  | -0.686089 |
| C | -2.035607 | 1.310818  | 0.399984  |
| C | -0.605491 | 0.854805  | 0.115787  |
| H | -2.427223 | 0.836224  | 1.313234  |
| H | -2.075147 | 2.386911  | 0.622375  |
| C | 0.339997  | 1.161224  | 1.282327  |
| H | -0.244667 | 1.343976  | -0.794812 |
| H | -0.603106 | -0.219738 | -0.093094 |
| C | 1.774896  | 0.705769  | 1.009497  |
| H | -0.033614 | 0.673140  | 2.190605  |
| H | 0.329335  | 2.238766  | 1.485924  |
| H | 1.822416  | -0.374029 | 0.839725  |
| H | 2.427552  | 0.937625  | 1.853989  |
| H | 2.186649  | 1.201853  | 0.125550  |
| O | -5.309390 | 1.065510  | -1.341882 |
| O | -2.731940 | 0.459469  | -1.721645 |
| H | -4.321808 | 0.163061  | -4.541977 |
| N | -4.479591 | -0.305583 | -3.648678 |
| H | -5.383123 | -0.023898 | -3.256763 |
| H | -3.759939 | -0.002043 | -2.926728 |
| H | -4.453354 | -1.316936 | -3.786708 |

## VIBRATIONAL FREQUENCIES

Scaling factor for frequencies = 1.00000000 (already applied!)

|    |      |                    |
|----|------|--------------------|
| 0: | 0.00 | cm** <sup>-1</sup> |
| 1: | 0.00 | cm** <sup>-1</sup> |
| 2: | 0.00 | cm** <sup>-1</sup> |
| 3: | 0.00 | cm** <sup>-1</sup> |

4: 0.00 cm\*\*-1  
5: 0.00 cm\*\*-1  
6: 35.20 cm\*\*-1  
7: 49.66 cm\*\*-1  
8: 62.78 cm\*\*-1  
9: 77.04 cm\*\*-1  
10: 98.12 cm\*\*-1  
11: 110.33 cm\*\*-1  
12: 126.68 cm\*\*-1  
13: 142.03 cm\*\*-1  
14: 146.18 cm\*\*-1  
15: 207.31 cm\*\*-1  
16: 232.13 cm\*\*-1  
17: 242.74 cm\*\*-1  
18: 282.23 cm\*\*-1  
19: 316.56 cm\*\*-1  
20: 348.32 cm\*\*-1  
21: 361.86 cm\*\*-1  
22: 386.31 cm\*\*-1  
23: 440.88 cm\*\*-1  
24: 483.96 cm\*\*-1  
25: 578.90 cm\*\*-1  
26: 629.35 cm\*\*-1  
27: 733.12 cm\*\*-1  
28: 785.66 cm\*\*-1  
29: 792.20 cm\*\*-1  
30: 917.30 cm\*\*-1  
31: 919.90 cm\*\*-1  
32: 973.02 cm\*\*-1  
33: 1012.35 cm\*\*-1  
34: 1025.08 cm\*\*-1  
35: 1062.74 cm\*\*-1  
36: 1078.42 cm\*\*-1  
37: 1116.44 cm\*\*-1  
38: 1135.63 cm\*\*-1  
39: 1205.40 cm\*\*-1  
40: 1229.16 cm\*\*-1  
41: 1296.87 cm\*\*-1  
42: 1306.81 cm\*\*-1  
43: 1334.39 cm\*\*-1  
44: 1377.42 cm\*\*-1  
45: 1391.77 cm\*\*-1  
46: 1393.62 cm\*\*-1  
47: 1403.69 cm\*\*-1  
48: 1417.57 cm\*\*-1  
49: 1421.41 cm\*\*-1  
50: 1458.38 cm\*\*-1  
51: 1462.91 cm\*\*-1  
52: 1487.79 cm\*\*-1  
53: 1494.72 cm\*\*-1  
54: 1501.13 cm\*\*-1  
55: 1509.90 cm\*\*-1  
56: 1511.50 cm\*\*-1  
57: 1572.77 cm\*\*-1  
58: 1713.55 cm\*\*-1  
59: 1736.60 cm\*\*-1  
60: 1739.94 cm\*\*-1  
61: 1777.61 cm\*\*-1  
62: 2784.35 cm\*\*-1  
63: 2988.72 cm\*\*-1  
64: 3006.80 cm\*\*-1  
65: 3012.69 cm\*\*-1  
66: 3025.36 cm\*\*-1  
67: 3031.57 cm\*\*-1  
68: 3031.98 cm\*\*-1  
69: 3033.86 cm\*\*-1

70: 3070.97 cm\*\*<sup>-1</sup>  
71: 3086.96 cm\*\*<sup>-1</sup>  
72: 3087.35 cm\*\*<sup>-1</sup>  
73: 3100.23 cm\*\*<sup>-1</sup>  
74: 3151.29 cm\*\*<sup>-1</sup>  
75: 3420.33 cm\*\*<sup>-1</sup>  
76: 3511.37 cm\*\*<sup>-1</sup>  
77: 3534.48 cm\*\*<sup>-1</sup>

#### GIBBS FREE ENERGY

The Gibbs free energy is  $G = H - T*S$

|                          |     |                  |                 |
|--------------------------|-----|------------------|-----------------|
| Total enthalpy           | ... | -481.00261178 Eh |                 |
| Total entropy correction | ... | -0.05554441 Eh   | -34.85 kcal/mol |
| -----                    |     |                  |                 |
| Final Gibbs free energy  | ... | -481.05815619 Eh |                 |

**C<sub>10</sub>H<sub>18</sub>ONH<sub>4</sub><sup>+</sup>**

CARTESIAN COORDINATES (ANGSTROEM)

## INPUT GEOMETRY OPTIMIZATION CYCLE

|   |           |           |           |
|---|-----------|-----------|-----------|
| O | 0.071380  | -2.141540 | 0.162330  |
| C | -0.632090 | 0.139000  | 0.573020  |
| C | 0.236030  | 1.341130  | 0.980830  |
| C | 2.087100  | 0.717300  | -0.644760 |
| C | 1.158090  | 1.826540  | -0.137030 |
| C | -1.799660 | 0.468240  | -0.397340 |
| C | 1.281630  | -0.503240 | -1.079010 |
| C | 0.268130  | -0.933890 | -0.038540 |
| C | 3.153870  | 0.338120  | 0.387700  |
| C | -2.688380 | -0.764150 | -0.629590 |
| C | -2.684390 | 1.612520  | 0.109190  |
| H | -1.052350 | -0.279090 | 1.497960  |
| H | 0.847880  | 1.055110  | 1.845490  |
| H | -0.380720 | 2.173860  | 1.333020  |
| H | 2.620360  | 1.099190  | -1.524980 |
| H | 0.553680  | 2.202080  | -0.971980 |
| H | 1.752810  | 2.675090  | 0.221260  |
| H | -1.395010 | 0.765670  | -1.372600 |
| H | 1.949240  | -1.347520 | -1.287290 |
| H | 0.730810  | -0.287810 | -2.001430 |
| H | 3.733420  | 1.218330  | 0.685040  |
| H | 2.721830  | -0.104800 | 1.290200  |
| H | 3.853250  | -0.392220 | -0.033780 |
| H | -3.076450 | -1.156390 | 0.316830  |
| H | -3.543540 | -0.515490 | -1.267330 |
| H | -2.139420 | -1.565670 | -1.132800 |
| H | -3.039040 | 1.419200  | 1.127180  |
| H | -3.562030 | 1.741810  | -0.534030 |
| H | -2.147900 | 2.565730  | 0.103400  |
| N | -0.213070 | -4.413180 | -0.921090 |
| H | -1.083350 | -4.330190 | -1.452350 |
| H | 0.595770  | -4.409750 | -1.547430 |
| H | -0.217980 | -5.251350 | -0.335210 |
| H | -0.062450 | -3.147350 | -0.234870 |

## FINAL GEOMETRY OPTIMIZATION CYCLE

|   |           |           |           |
|---|-----------|-----------|-----------|
| O | -0.197194 | -2.092469 | 0.118784  |
| C | -0.826459 | 0.171976  | 0.503996  |
| C | 0.222294  | 1.181748  | 1.049083  |
| C | 1.904442  | 0.538749  | -0.762189 |
| C | 1.179141  | 1.686678  | -0.036161 |
| C | -1.910599 | 0.815676  | -0.417805 |
| C | 0.857278  | -0.474496 | -1.312560 |
| C | -0.075896 | -0.907208 | -0.221229 |
| C | 2.940412  | -0.166936 | 0.121148  |
| C | -2.798578 | -0.260568 | -1.056097 |
| C | -2.765714 | 1.814968  | 0.369453  |
| H | -1.343634 | -0.306020 | 1.341161  |
| H | 0.787755  | 0.696970  | 1.850645  |
| H | -0.299993 | 2.016927  | 1.517401  |
| H | 2.427377  | 0.952347  | -1.629445 |
| H | 0.630617  | 2.287699  | -0.768139 |
| H | 1.919721  | 2.354961  | 0.412027  |
| H | -1.403941 | 1.363218  | -1.220209 |
| H | 1.344608  | -1.341350 | -1.766605 |
| H | 0.261154  | 0.021800  | -2.085947 |
| H | 3.683430  | 0.546017  | 0.485916  |
| H | 2.488802  | -0.644775 | 0.996417  |
| H | 3.475803  | -0.937381 | -0.442319 |
| H | -3.291159 | -0.866873 | -0.289195 |
| H | -3.577791 | 0.200180  | -1.667025 |

|   |           |           |           |
|---|-----------|-----------|-----------|
| H | -2.235795 | -0.938469 | -1.706343 |
| H | -3.270757 | 1.324734  | 1.207858  |
| H | -3.535918 | 2.238464  | -0.279769 |
| H | -2.181499 | 2.647810  | 0.764465  |
| N | 0.704897  | -4.430930 | -0.403367 |
| H | 0.383698  | -4.801418 | -1.298849 |
| H | 1.720536  | -4.519604 | -0.352140 |
| H | 0.288899  | -4.984604 | 0.347944  |
| H | 0.391514  | -3.372531 | -0.280893 |

#### VIBRATIONAL FREQUENCIES

Scaling factor for frequencies = 1.00000000 (already applied!)

|     |         |                    |
|-----|---------|--------------------|
| 0:  | 0.00    | cm** <sup>-1</sup> |
| 1:  | 0.00    | cm** <sup>-1</sup> |
| 2:  | 0.00    | cm** <sup>-1</sup> |
| 3:  | 0.00    | cm** <sup>-1</sup> |
| 4:  | 0.00    | cm** <sup>-1</sup> |
| 5:  | 0.00    | cm** <sup>-1</sup> |
| 6:  | 26.52   | cm** <sup>-1</sup> |
| 7:  | 31.98   | cm** <sup>-1</sup> |
| 8:  | 46.40   | cm** <sup>-1</sup> |
| 9:  | 53.95   | cm** <sup>-1</sup> |
| 10: | 87.28   | cm** <sup>-1</sup> |
| 11: | 113.49  | cm** <sup>-1</sup> |
| 12: | 152.73  | cm** <sup>-1</sup> |
| 13: | 182.14  | cm** <sup>-1</sup> |
| 14: | 216.77  | cm** <sup>-1</sup> |
| 15: | 224.25  | cm** <sup>-1</sup> |
| 16: | 242.39  | cm** <sup>-1</sup> |
| 17: | 255.16  | cm** <sup>-1</sup> |
| 18: | 317.01  | cm** <sup>-1</sup> |
| 19: | 346.54  | cm** <sup>-1</sup> |
| 20: | 366.22  | cm** <sup>-1</sup> |
| 21: | 378.75  | cm** <sup>-1</sup> |
| 22: | 398.17  | cm** <sup>-1</sup> |
| 23: | 427.18  | cm** <sup>-1</sup> |
| 24: | 436.09  | cm** <sup>-1</sup> |
| 25: | 441.11  | cm** <sup>-1</sup> |
| 26: | 478.45  | cm** <sup>-1</sup> |
| 27: | 551.23  | cm** <sup>-1</sup> |
| 28: | 557.27  | cm** <sup>-1</sup> |
| 29: | 593.36  | cm** <sup>-1</sup> |
| 30: | 712.40  | cm** <sup>-1</sup> |
| 31: | 755.16  | cm** <sup>-1</sup> |
| 32: | 813.51  | cm** <sup>-1</sup> |
| 33: | 826.74  | cm** <sup>-1</sup> |
| 34: | 865.84  | cm** <sup>-1</sup> |
| 35: | 900.91  | cm** <sup>-1</sup> |
| 36: | 922.57  | cm** <sup>-1</sup> |
| 37: | 935.68  | cm** <sup>-1</sup> |
| 38: | 952.98  | cm** <sup>-1</sup> |
| 39: | 966.50  | cm** <sup>-1</sup> |
| 40: | 969.73  | cm** <sup>-1</sup> |
| 41: | 995.35  | cm** <sup>-1</sup> |
| 42: | 1019.37 | cm** <sup>-1</sup> |
| 43: | 1056.47 | cm** <sup>-1</sup> |
| 44: | 1074.42 | cm** <sup>-1</sup> |
| 45: | 1099.21 | cm** <sup>-1</sup> |
| 46: | 1134.53 | cm** <sup>-1</sup> |
| 47: | 1152.43 | cm** <sup>-1</sup> |
| 48: | 1166.85 | cm** <sup>-1</sup> |
| 49: | 1185.50 | cm** <sup>-1</sup> |
| 50: | 1212.37 | cm** <sup>-1</sup> |
| 51: | 1248.37 | cm** <sup>-1</sup> |
| 52: | 1278.67 | cm** <sup>-1</sup> |

53: 1287.12 cm\*\*-1  
 54: 1301.54 cm\*\*-1  
 55: 1326.56 cm\*\*-1  
 56: 1353.80 cm\*\*-1  
 57: 1358.81 cm\*\*-1  
 58: 1366.27 cm\*\*-1  
 59: 1368.53 cm\*\*-1  
 60: 1379.55 cm\*\*-1  
 61: 1382.93 cm\*\*-1  
 62: 1397.75 cm\*\*-1  
 63: 1409.82 cm\*\*-1  
 64: 1420.66 cm\*\*-1  
 65: 1430.48 cm\*\*-1  
 66: 1473.27 cm\*\*-1  
 67: 1484.60 cm\*\*-1  
 68: 1487.24 cm\*\*-1  
 69: 1494.46 cm\*\*-1  
 70: 1499.22 cm\*\*-1  
 71: 1505.45 cm\*\*-1  
 72: 1505.70 cm\*\*-1  
 73: 1508.55 cm\*\*-1  
 74: 1519.06 cm\*\*-1  
 75: 1549.65 cm\*\*-1  
 76: 1562.93 cm\*\*-1  
 77: 1657.99 cm\*\*-1  
 78: 1728.56 cm\*\*-1  
 79: 1731.92 cm\*\*-1  
 80: 2106.93 cm\*\*-1  
 81: 3017.36 cm\*\*-1  
 82: 3018.39 cm\*\*-1  
 83: 3020.83 cm\*\*-1  
 84: 3028.98 cm\*\*-1  
 85: 3031.99 cm\*\*-1  
 86: 3034.91 cm\*\*-1  
 87: 3042.75 cm\*\*-1  
 88: 3048.02 cm\*\*-1  
 89: 3056.73 cm\*\*-1  
 90: 3073.35 cm\*\*-1  
 91: 3074.83 cm\*\*-1  
 92: 3078.41 cm\*\*-1  
 93: 3080.72 cm\*\*-1  
 94: 3091.34 cm\*\*-1  
 95: 3094.88 cm\*\*-1  
 96: 3097.56 cm\*\*-1  
 97: 3100.35 cm\*\*-1  
 98: 3109.25 cm\*\*-1  
 99: 3436.84 cm\*\*-1  
 100: 3528.94 cm\*\*-1  
 101: 3536.49 cm\*\*-1

GIBBS FREE ENERGY

|                          |     |                  |                 |
|--------------------------|-----|------------------|-----------------|
| Total enthalpy           | ... | -523.61370268 Eh |                 |
| Total entropy correction | ... | -0.05703075 Eh   | -35.79 kcal/mol |
| -----                    |     |                  |                 |
| Final Gibbs free energy  | ... | -523.67073343 Eh |                 |
